# Supplementary material
Source: PubMed Central journal article supplement (PMC6168984)

S1: HeLa cell images used for colocalization analysis shown in Fig. 3 and 4.

# WT CLN5 expression and co-localization with Lysosomal marker Lamp1

WT CLN5 expression

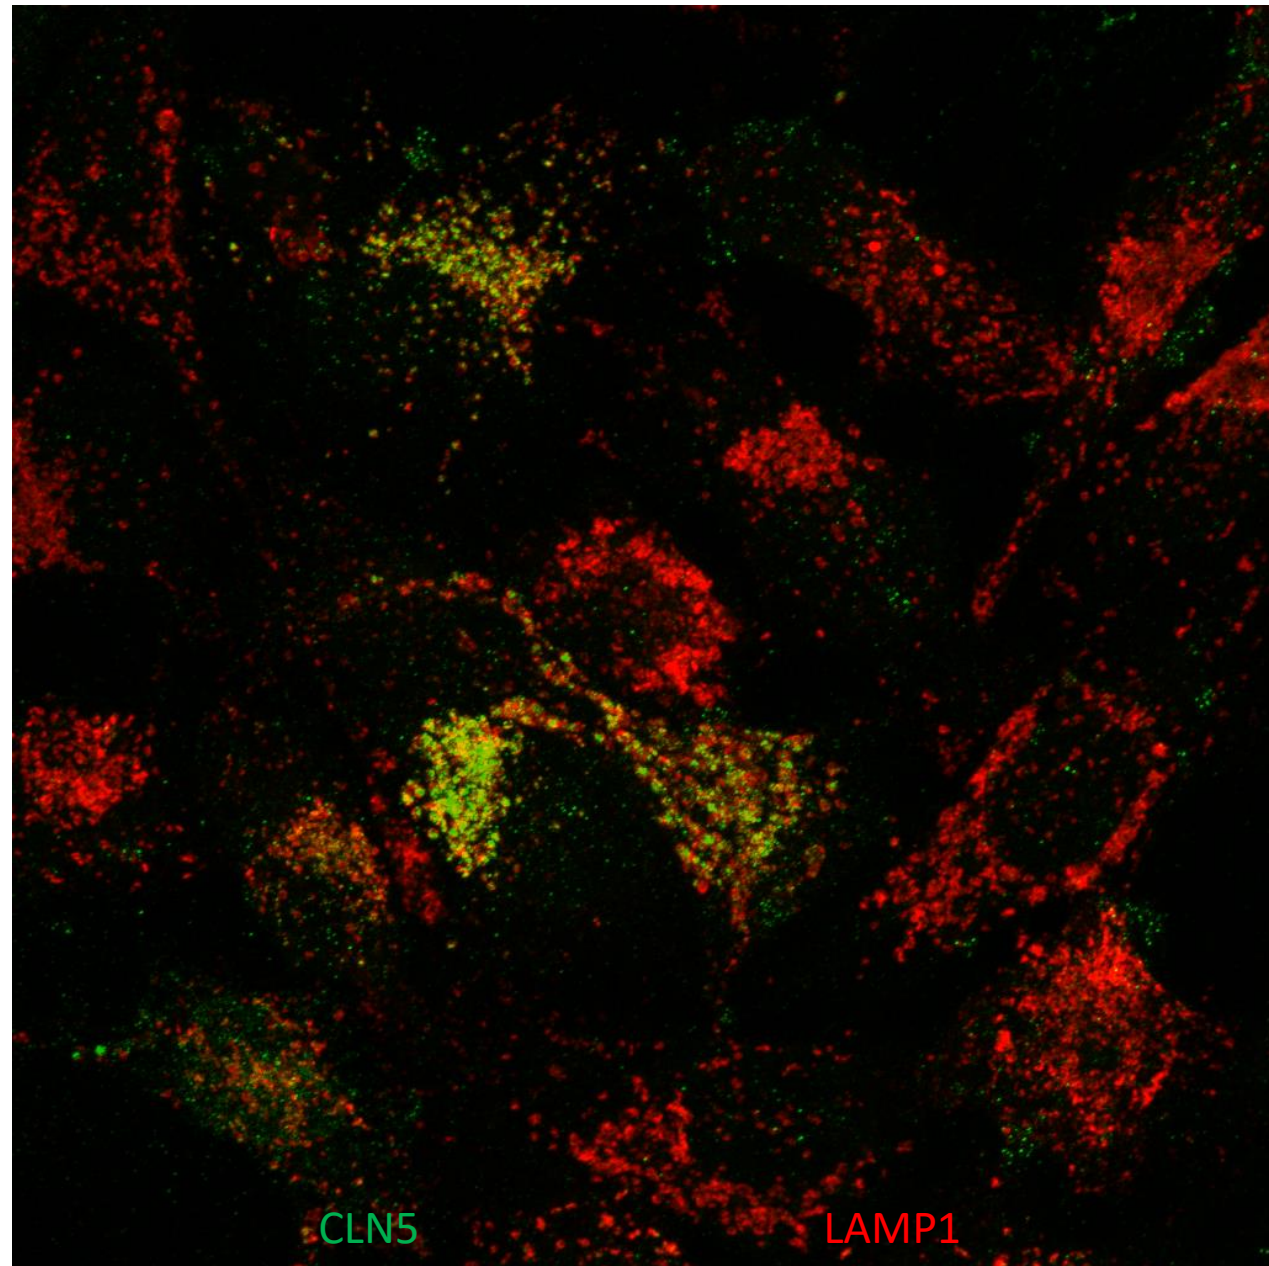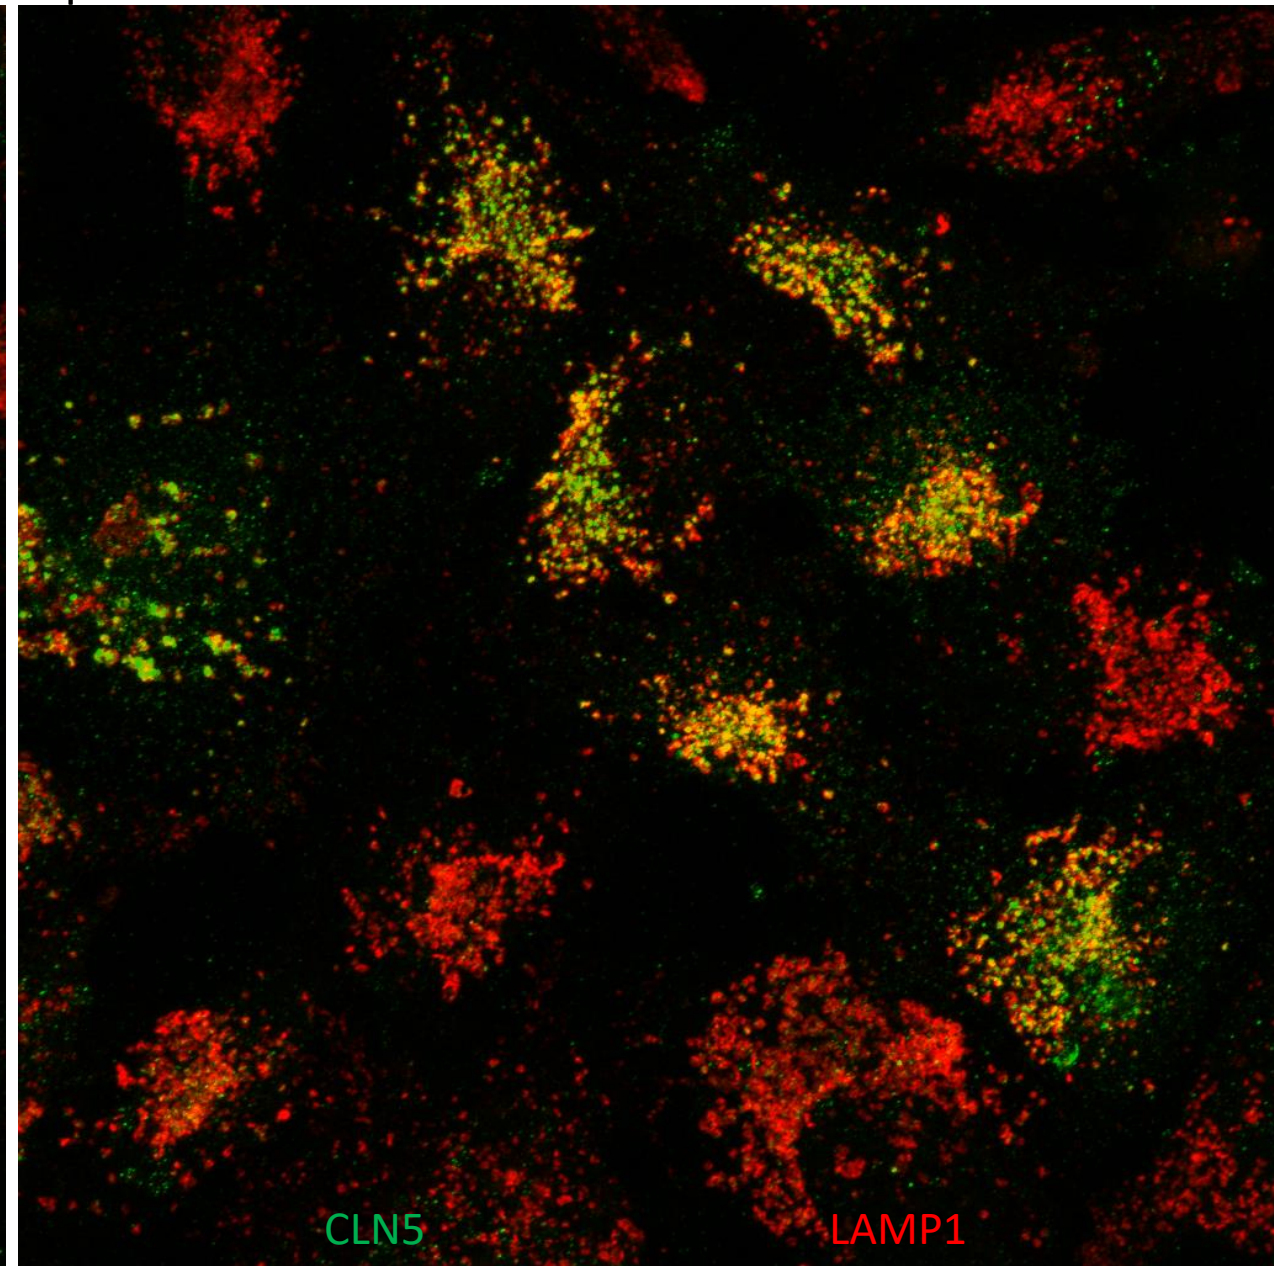

WT CLN5 expression

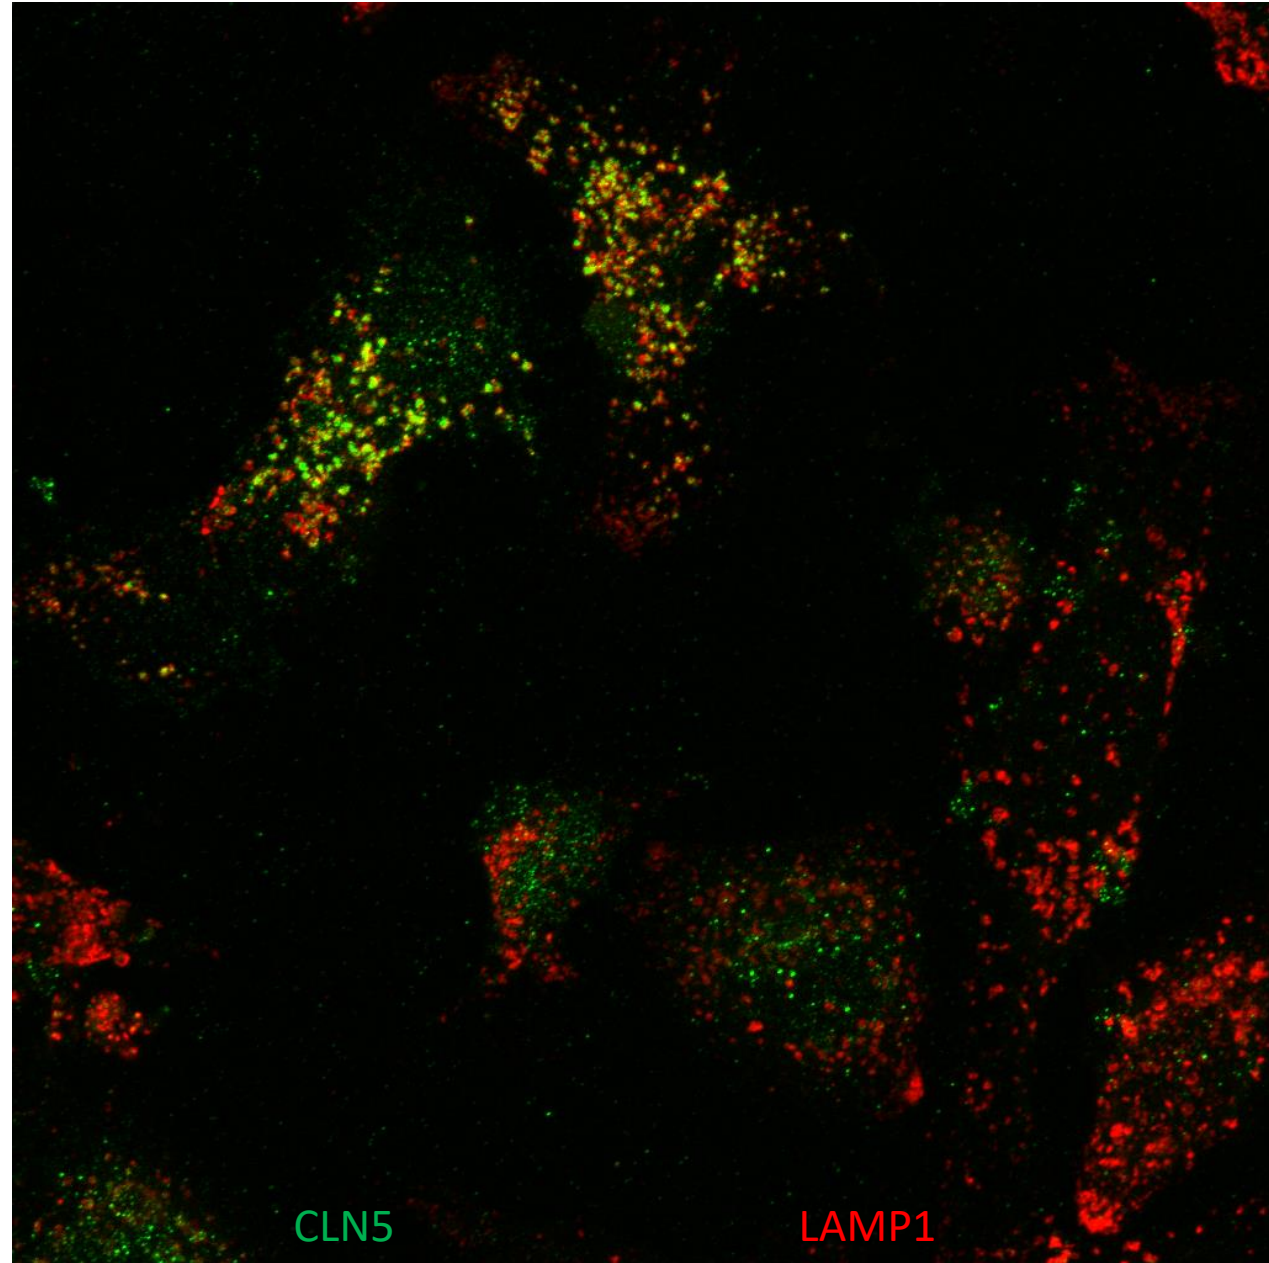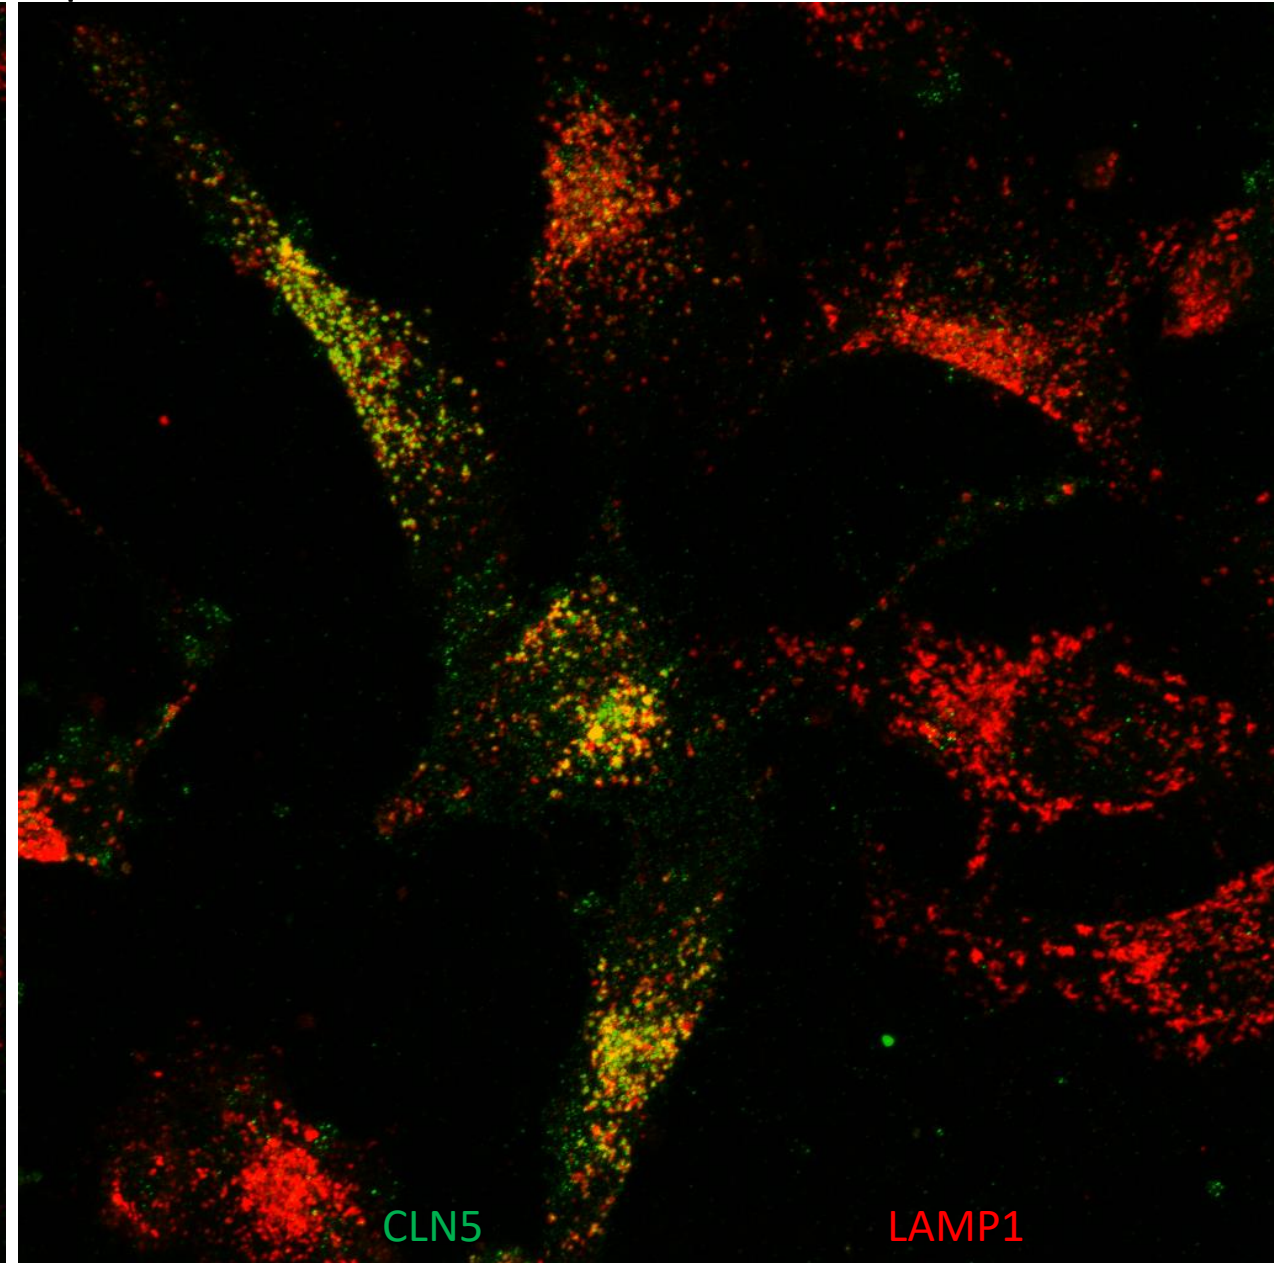

WT CLN5 expression

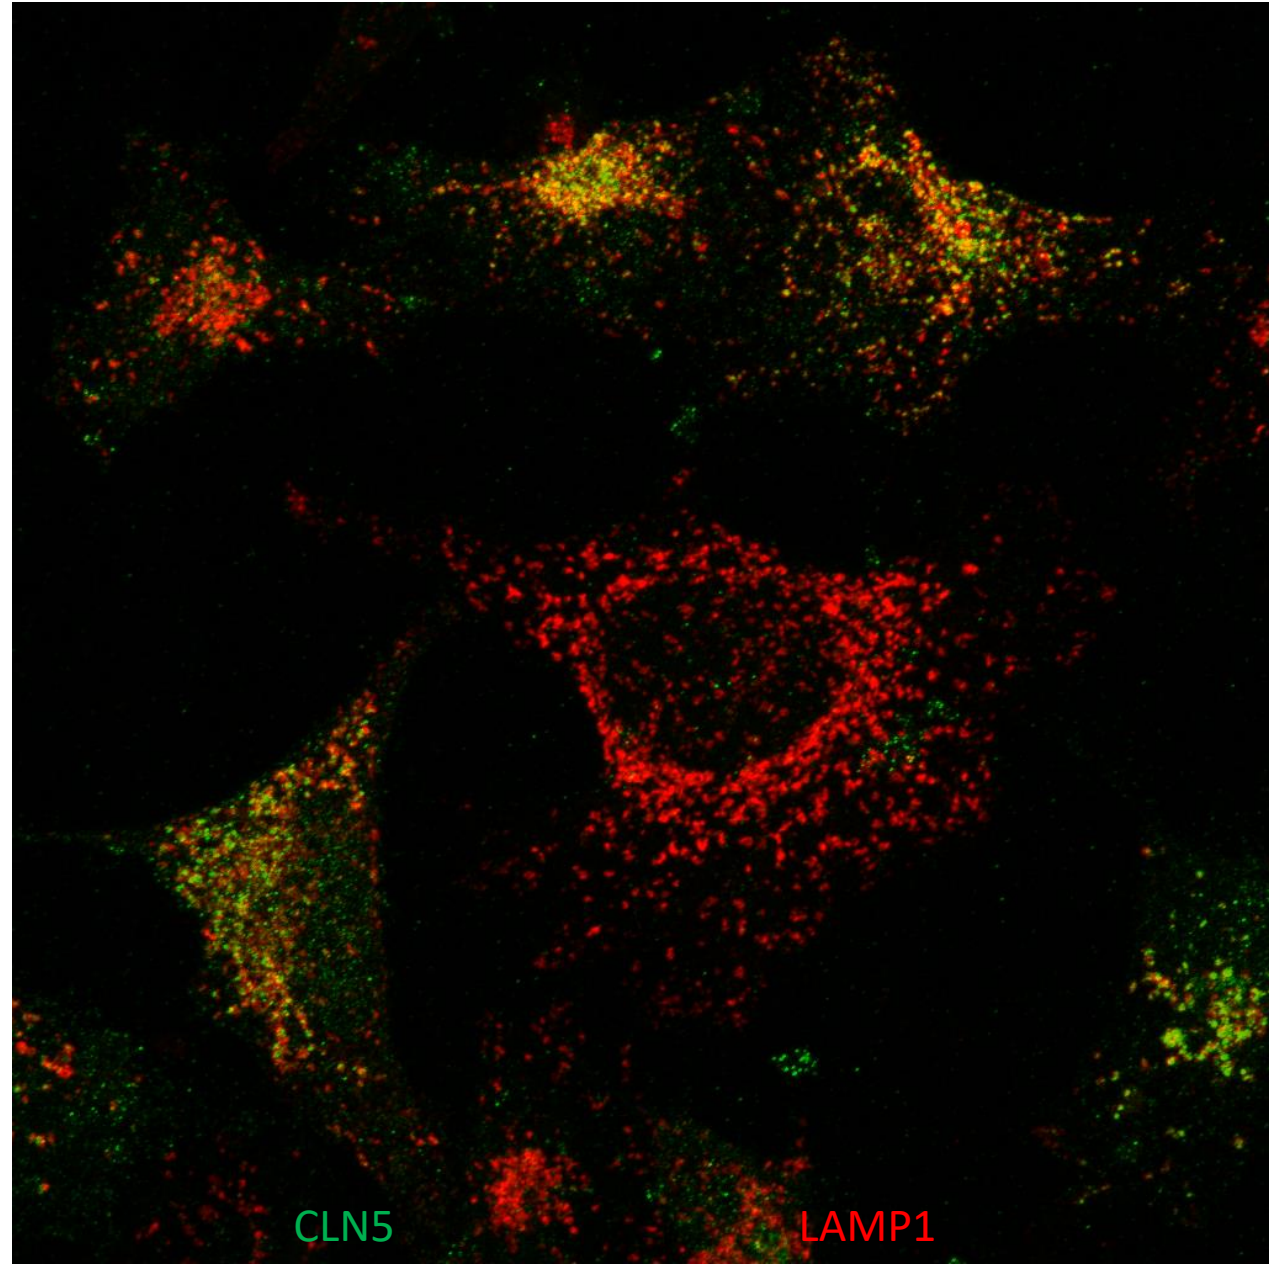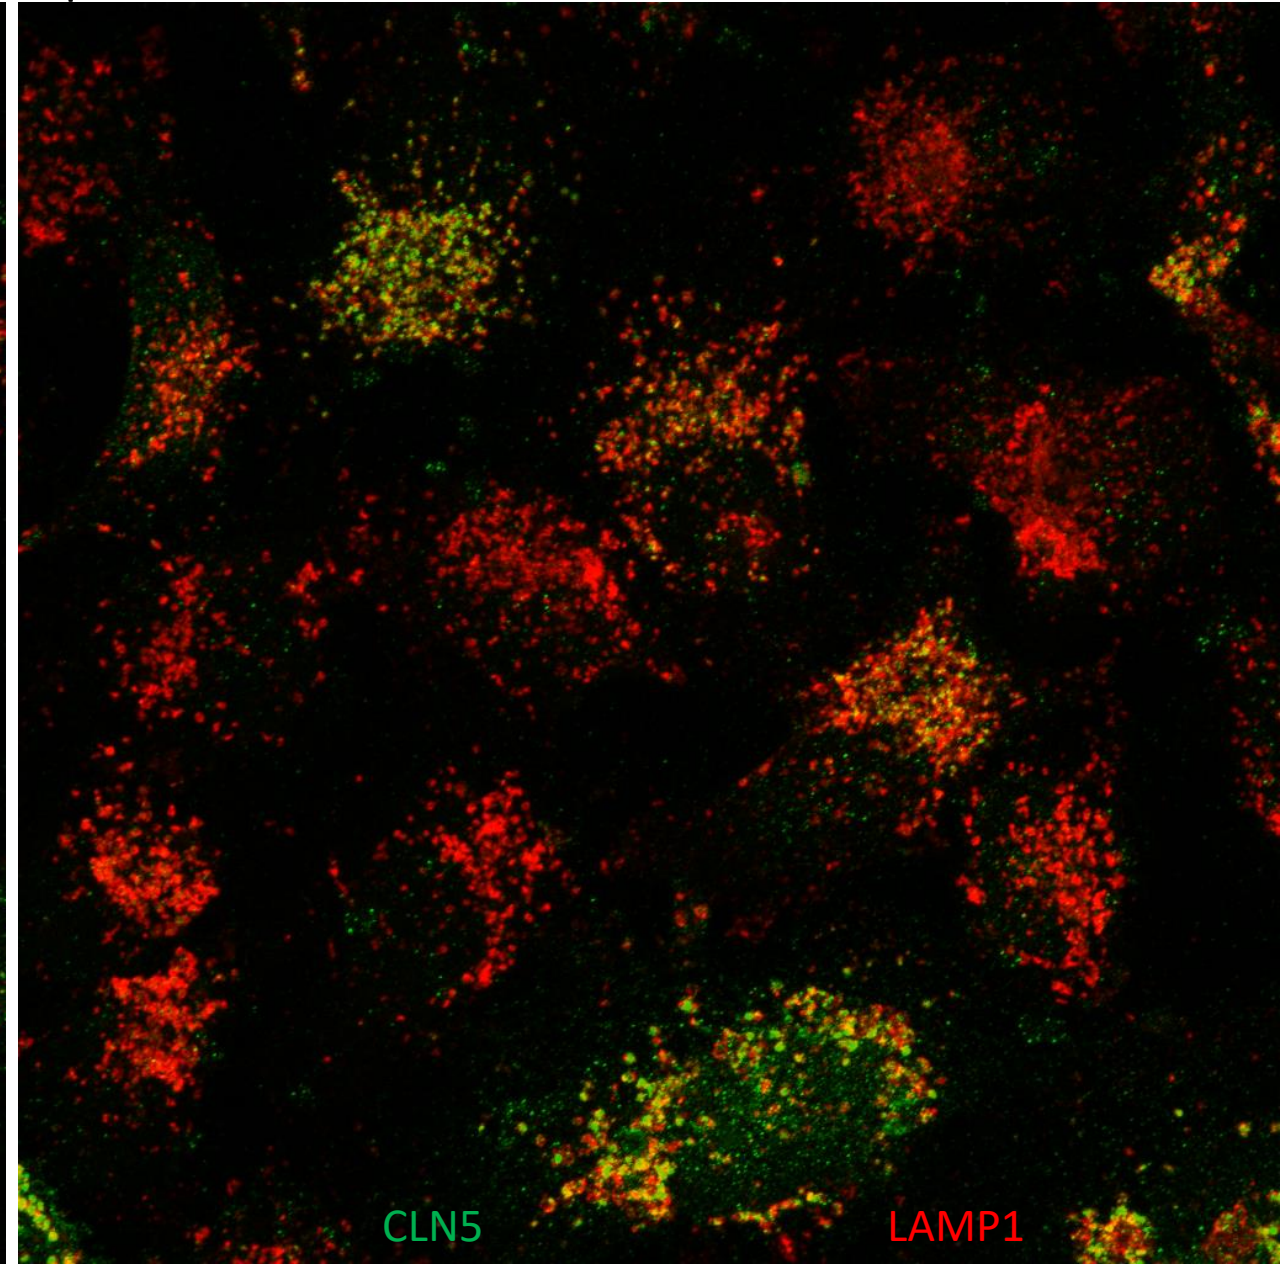

WT CLN5 expression

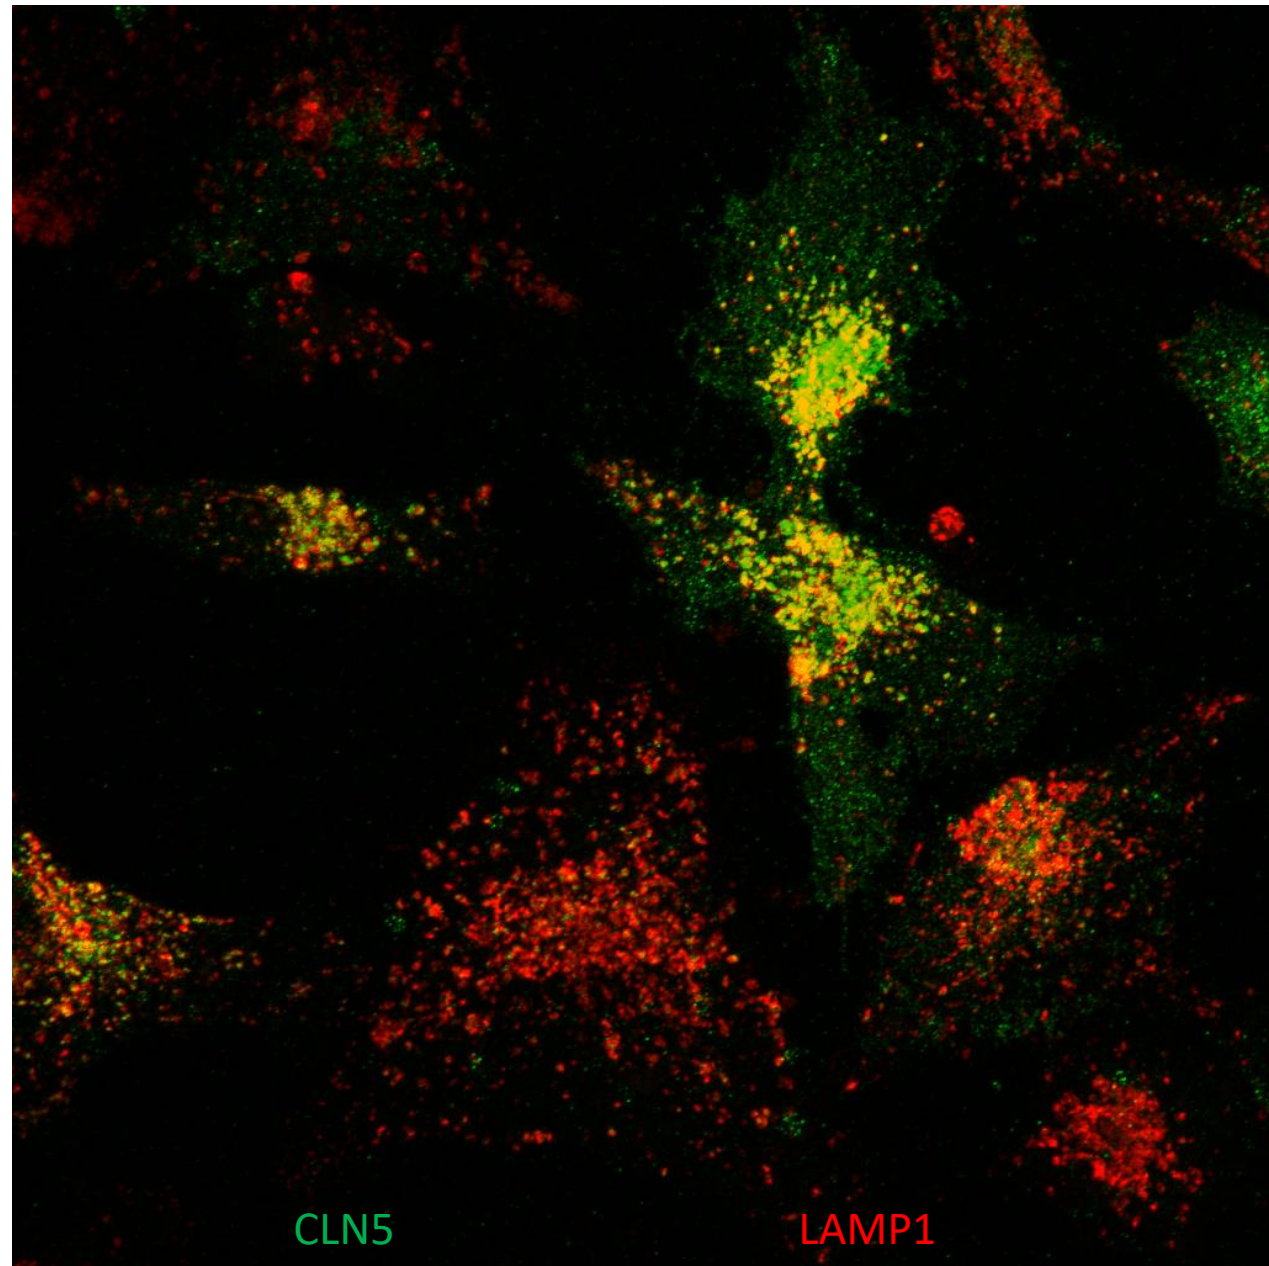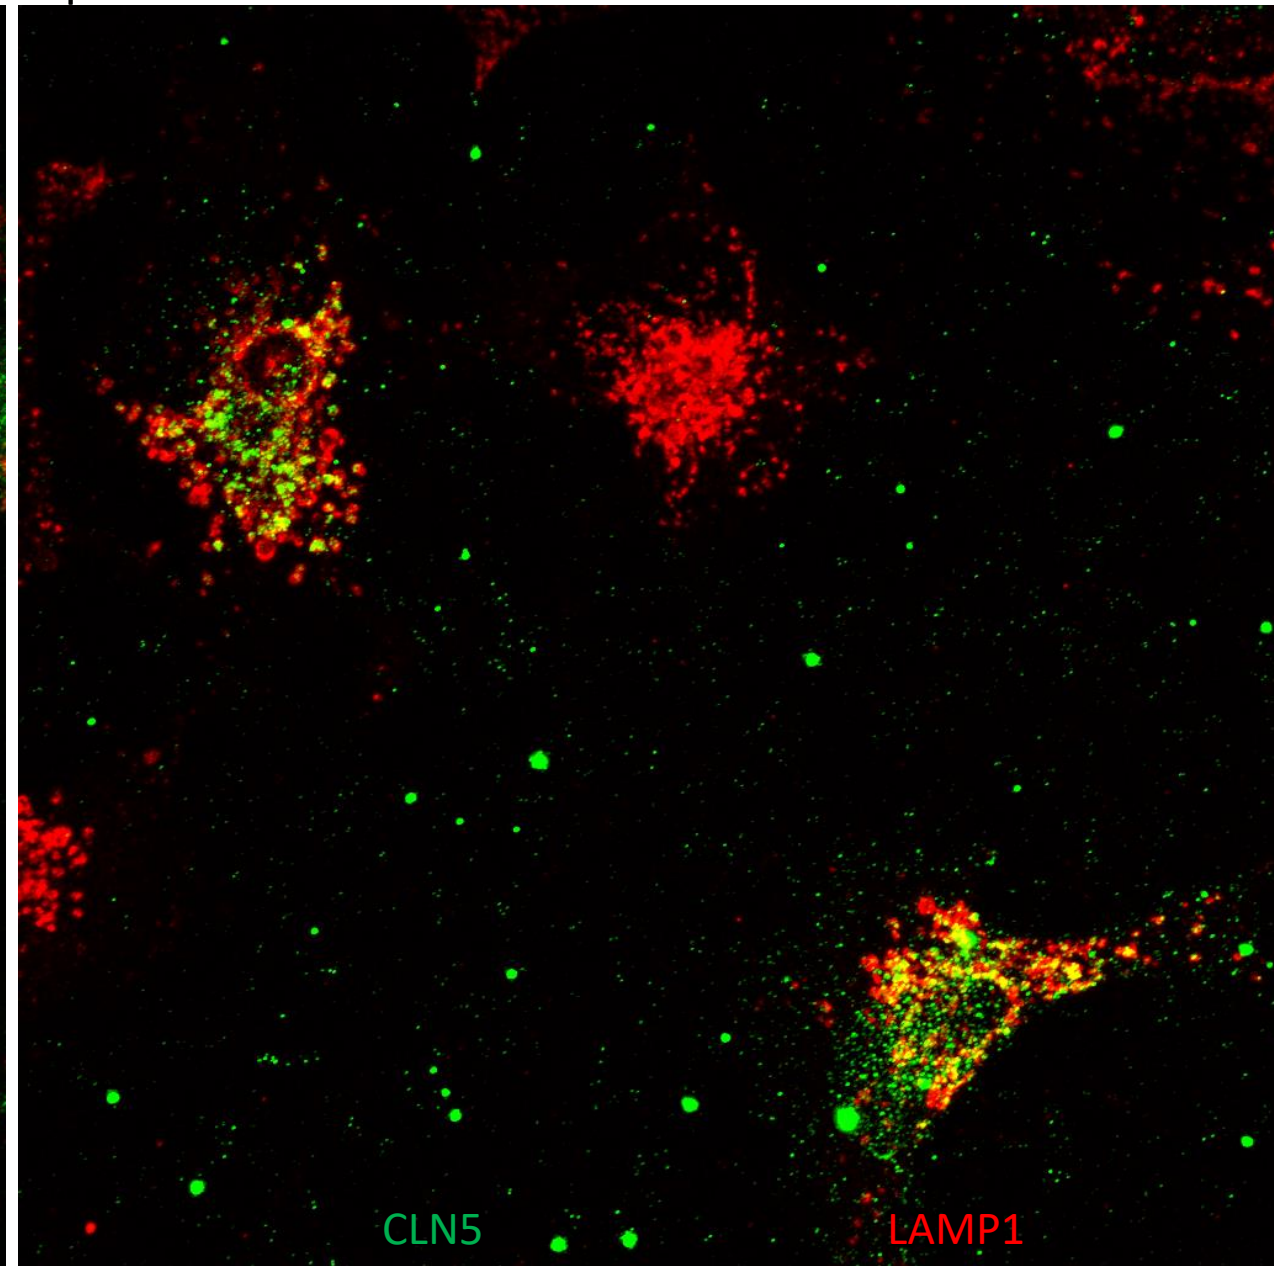

WT CLN5 expression

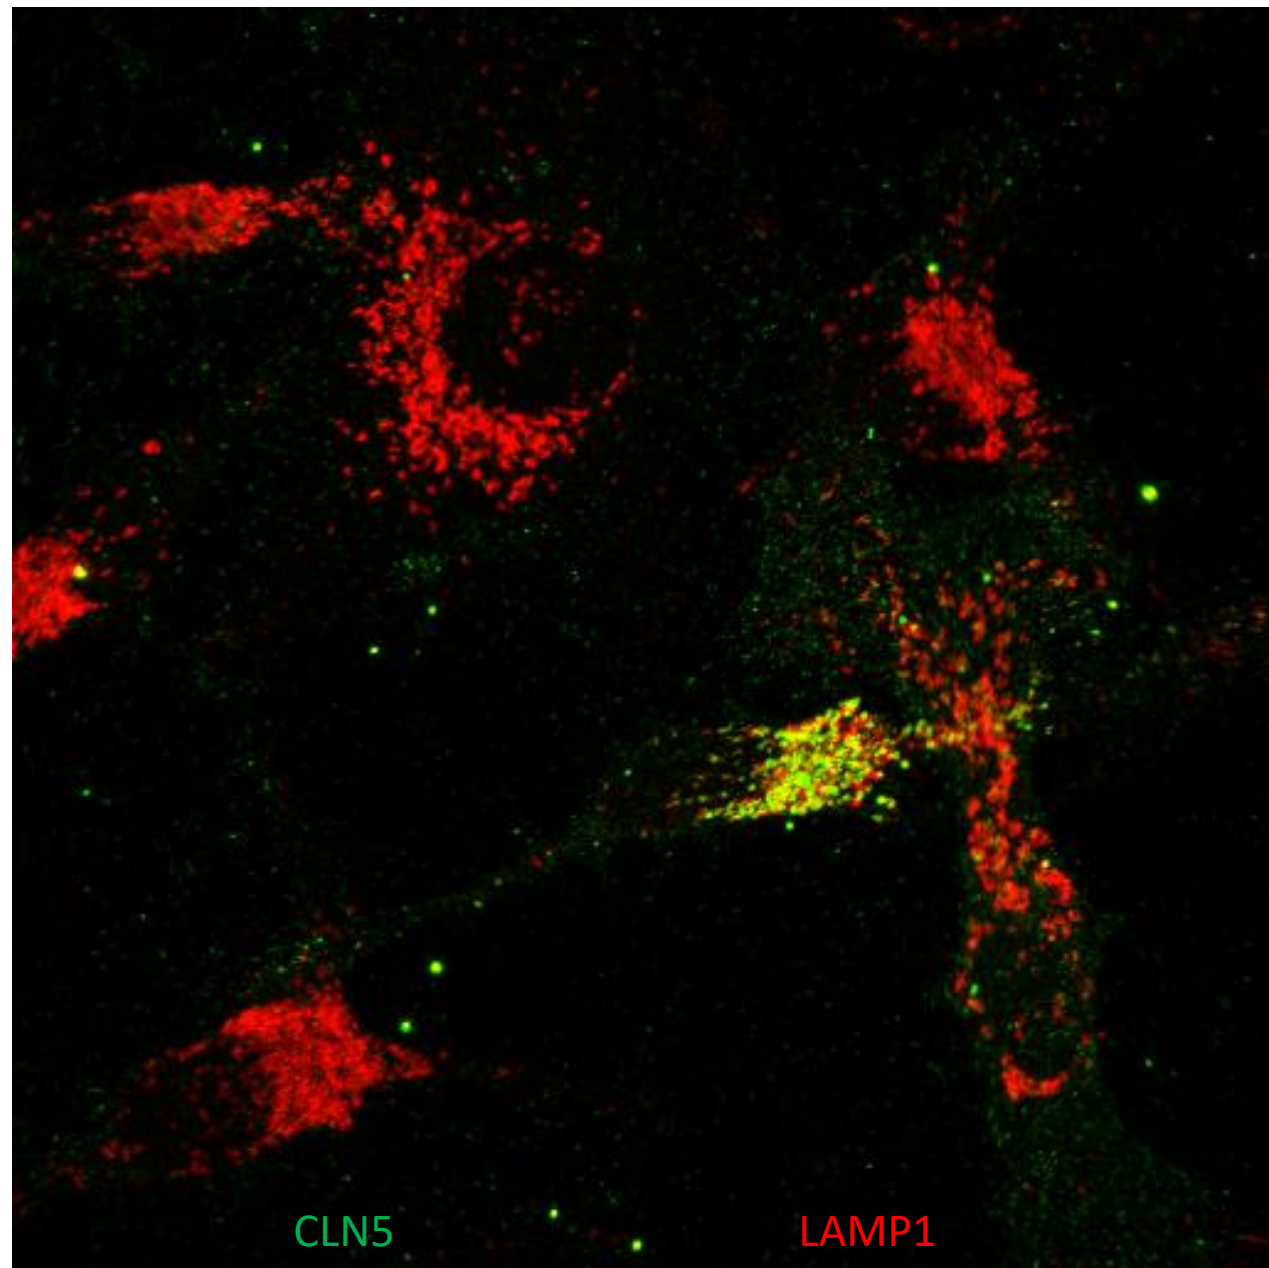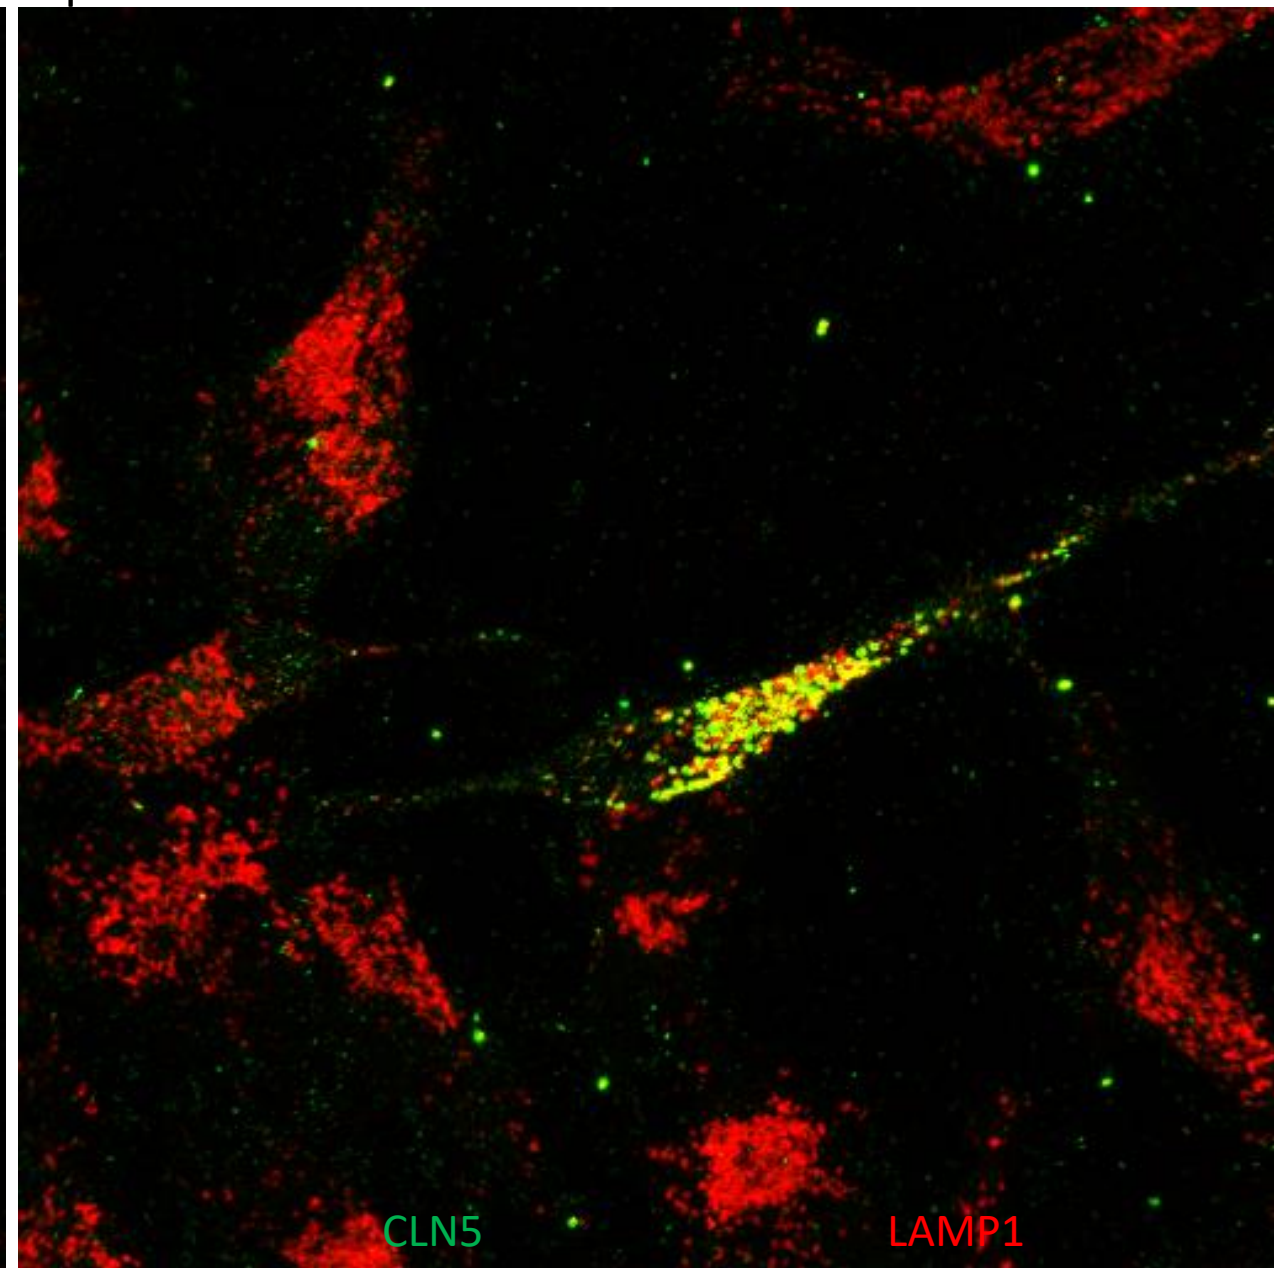

WT CLN5 expression

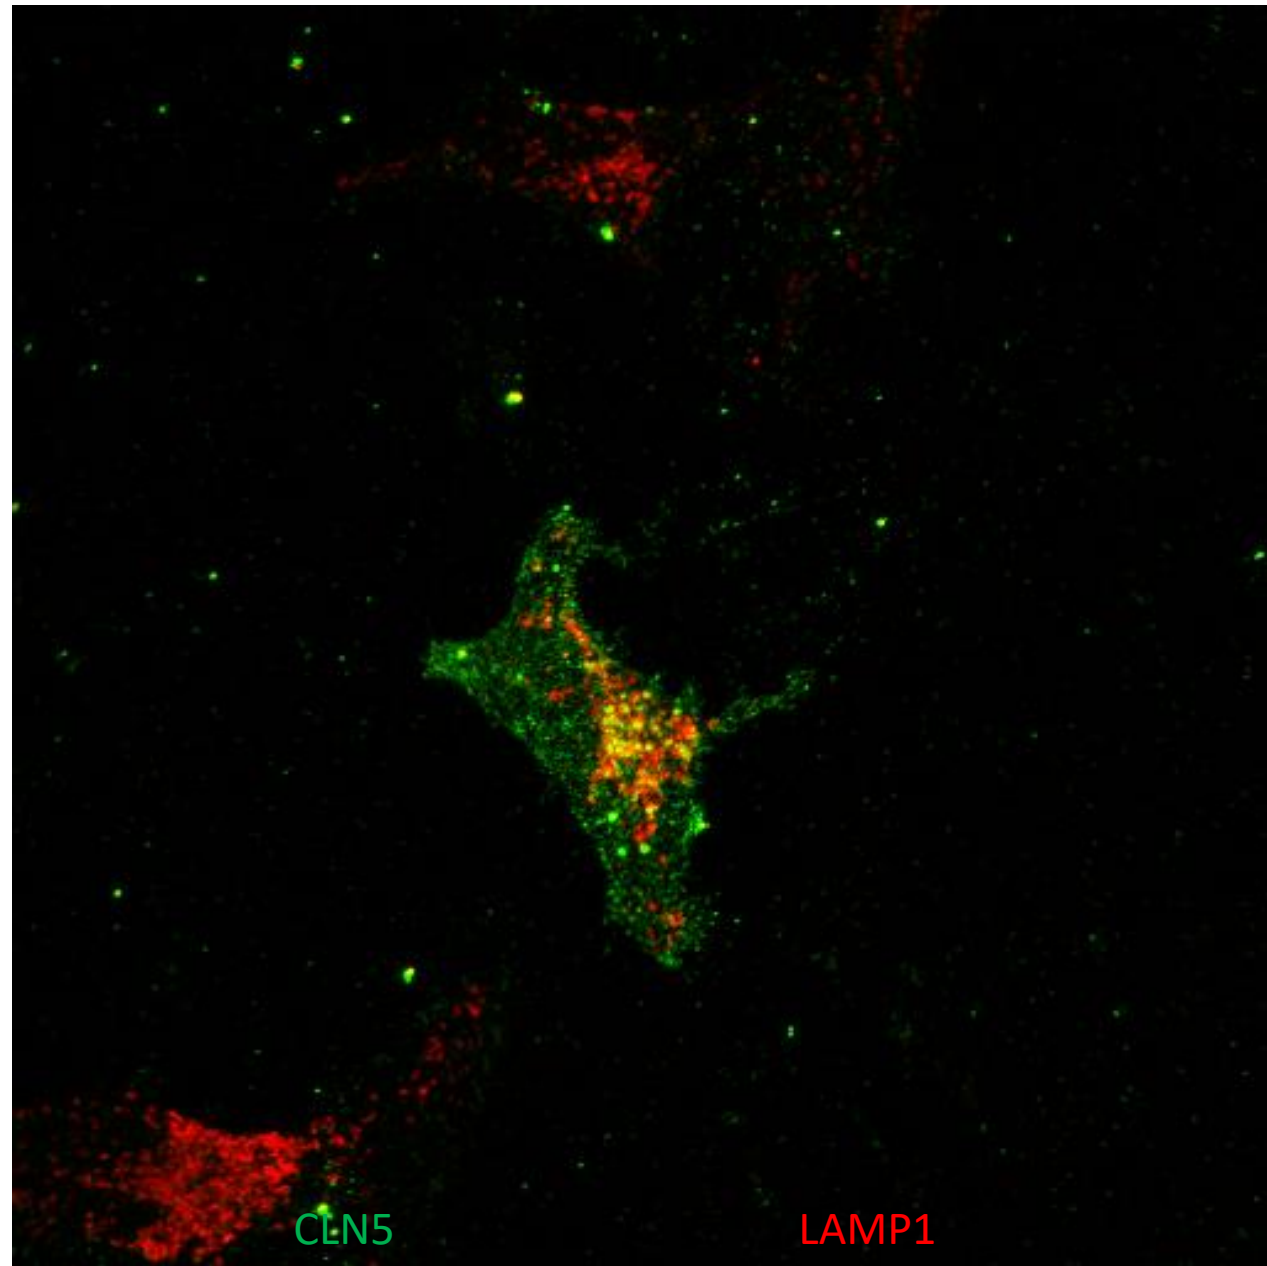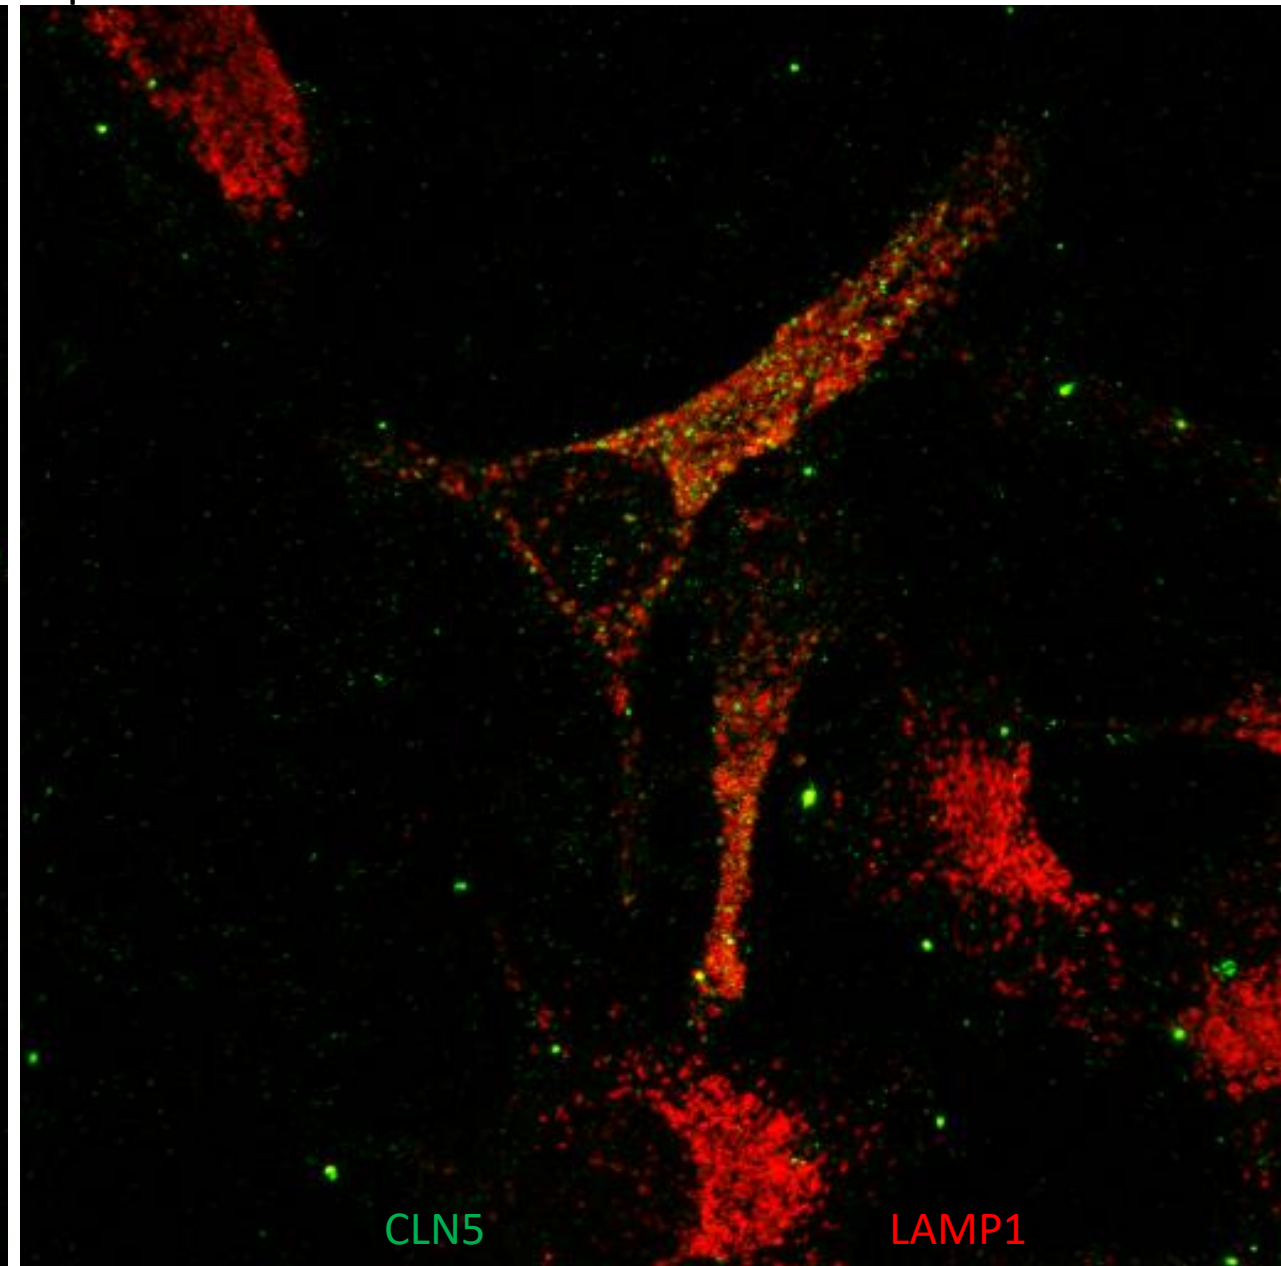

WT CLN5 expression

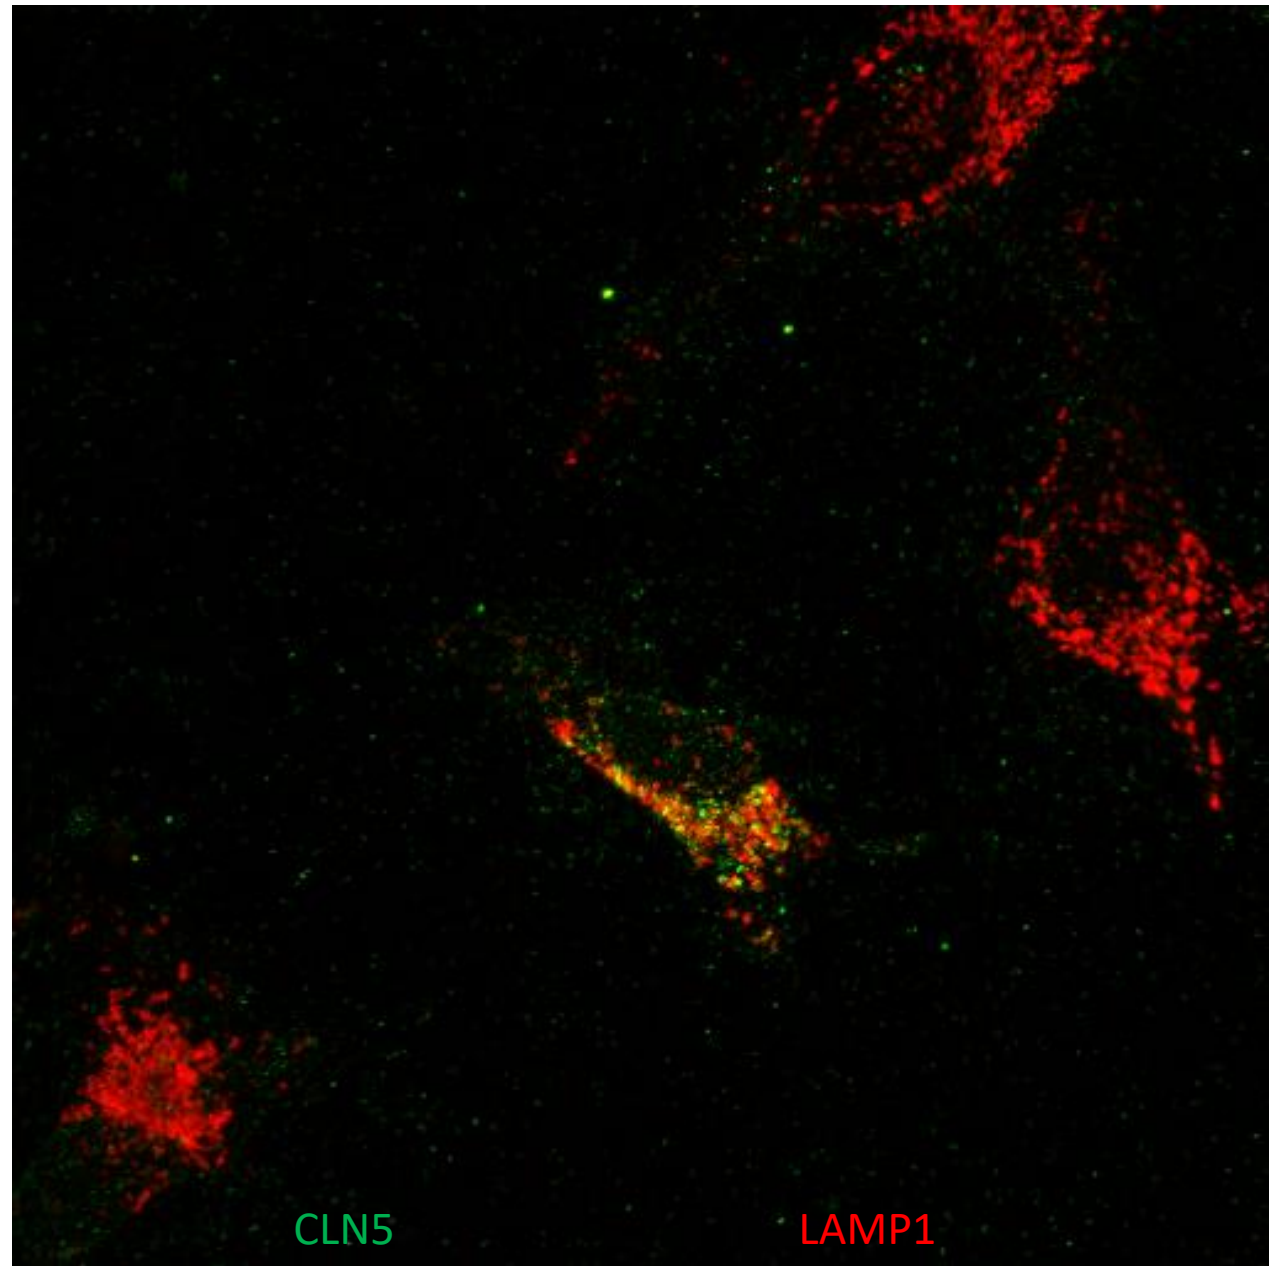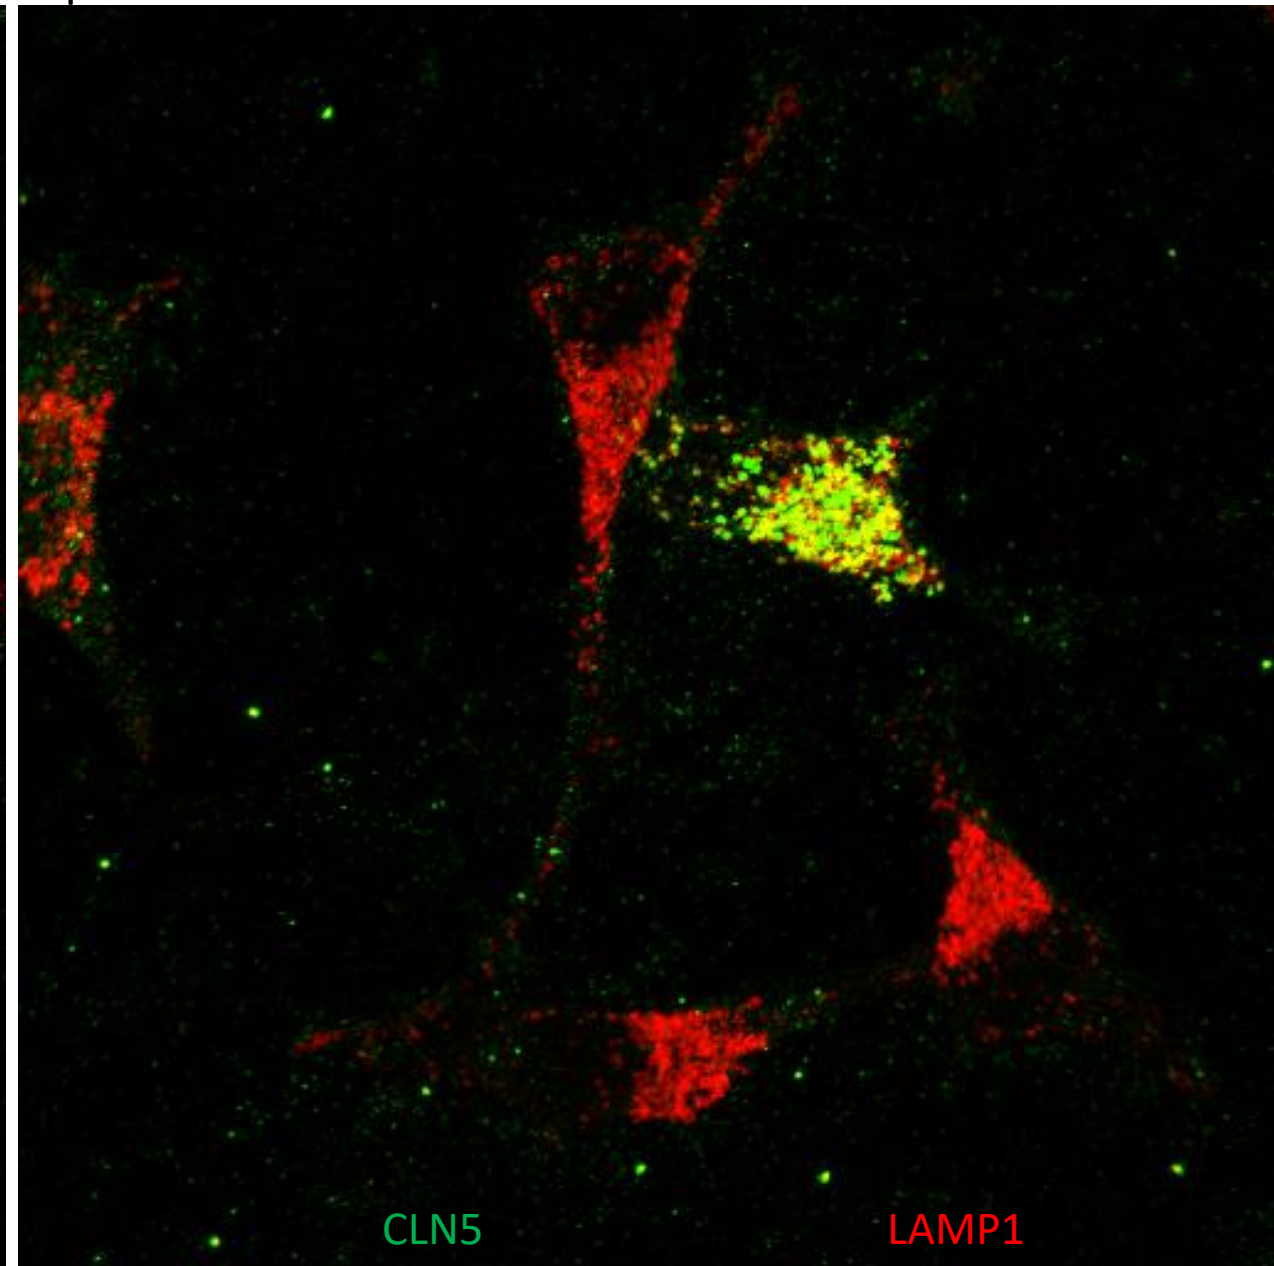



WT CLN5 expression

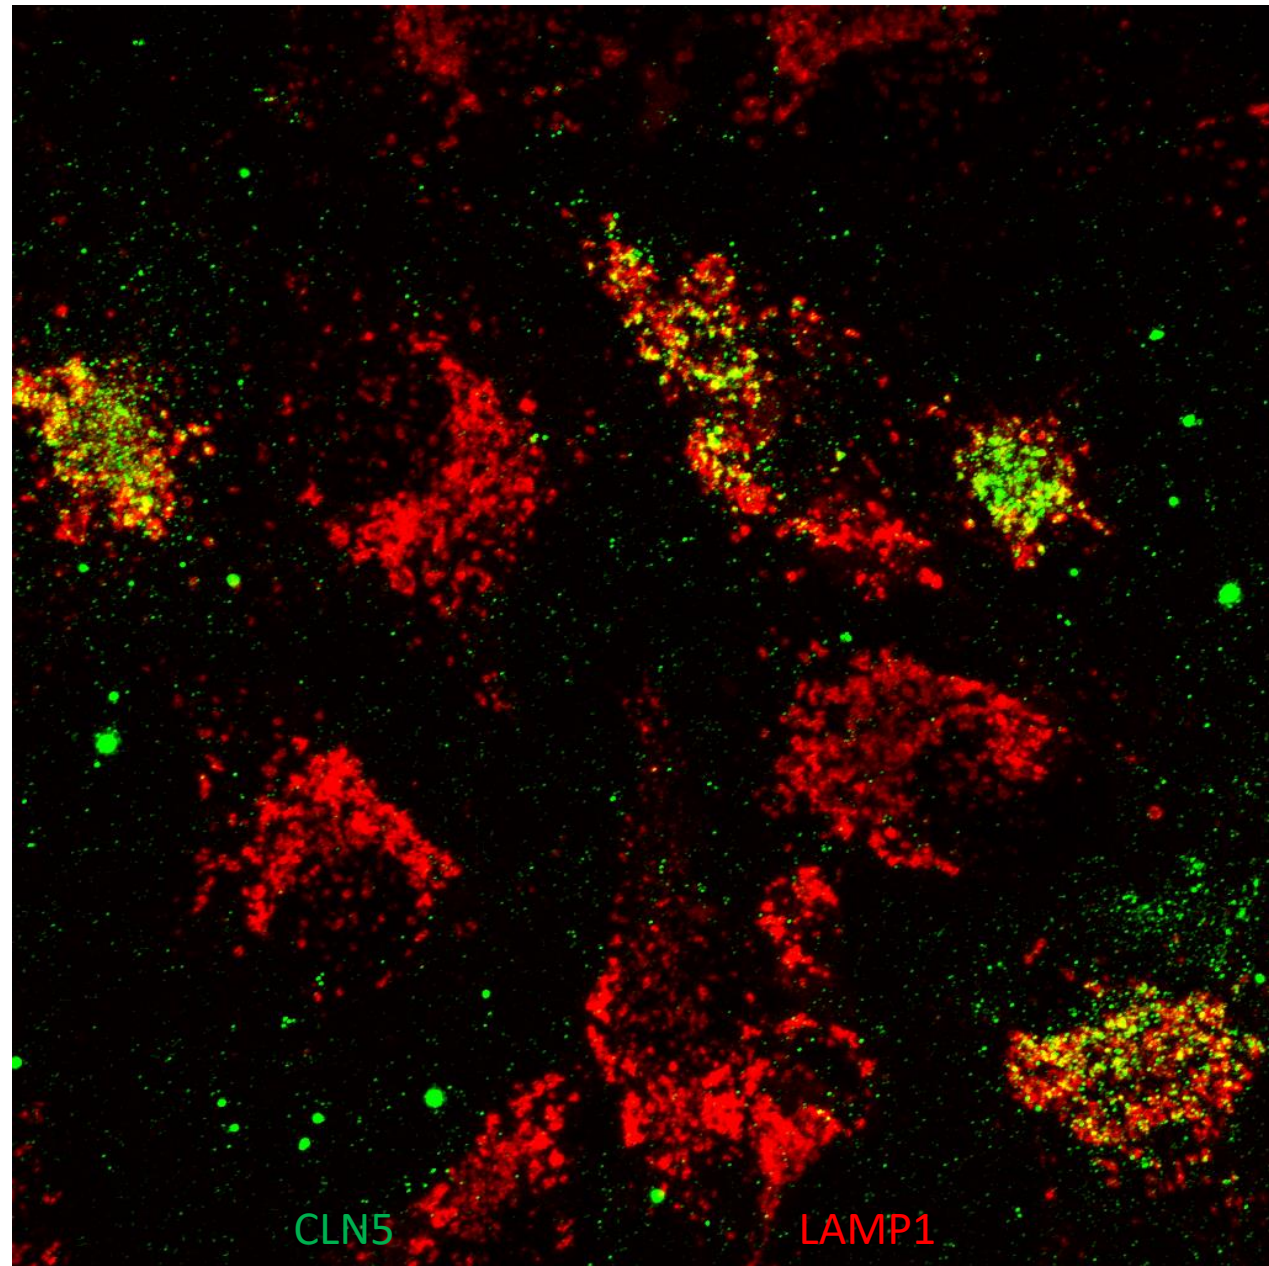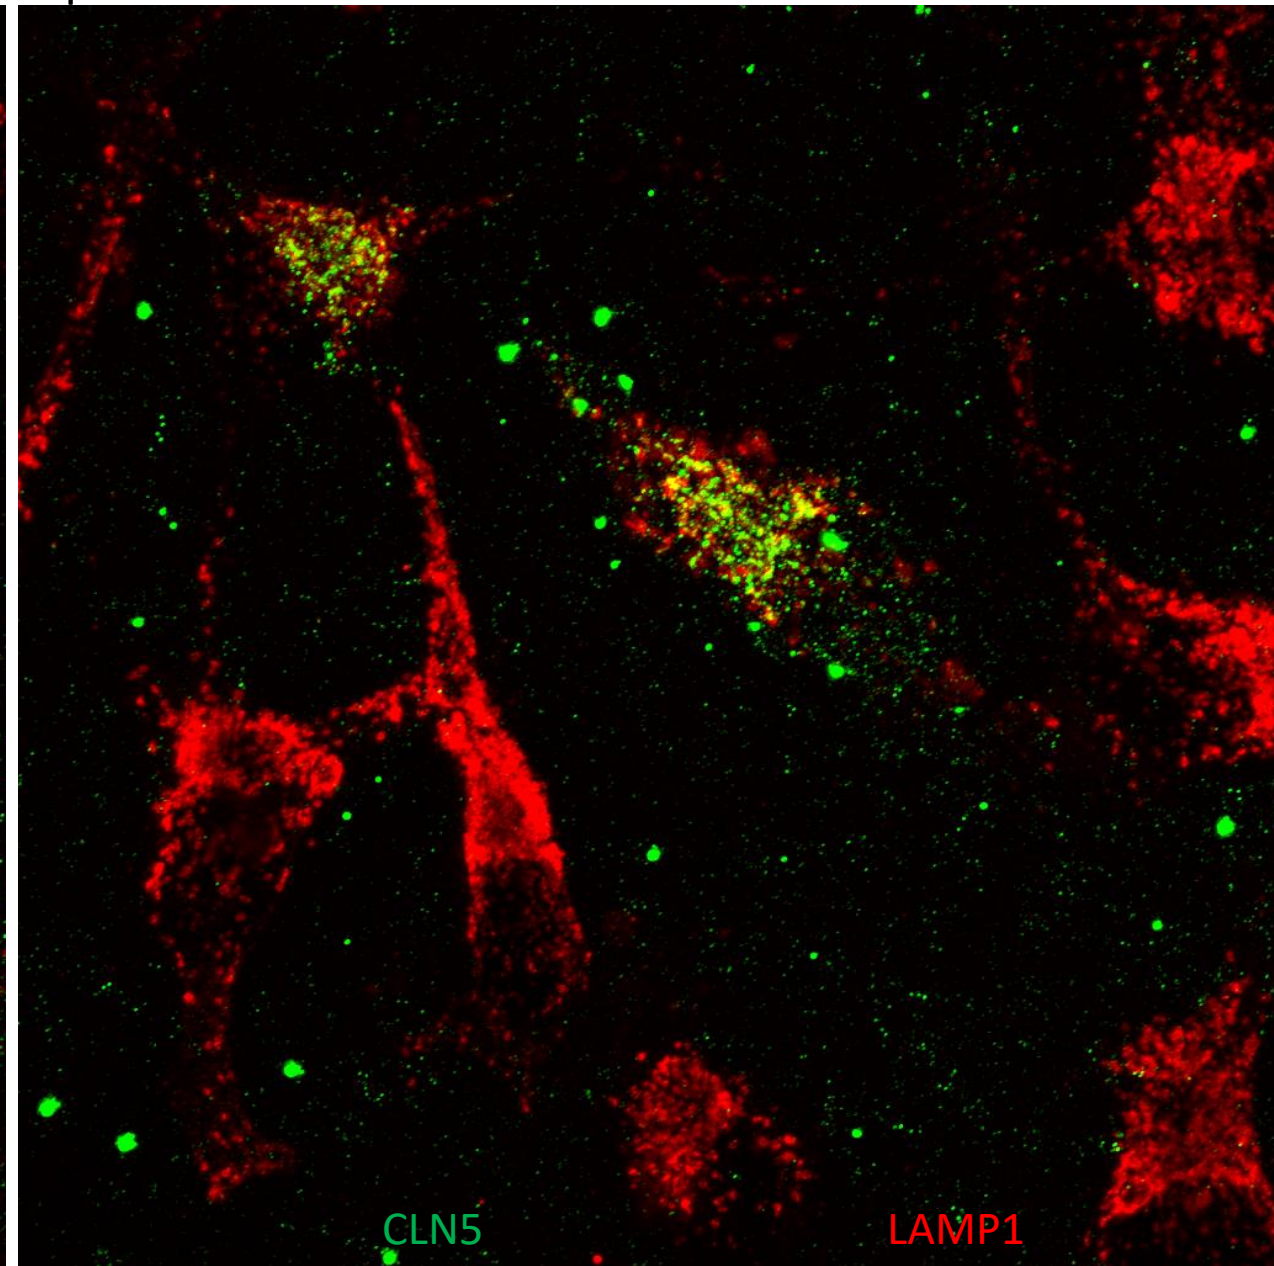

WT CLN5 expression

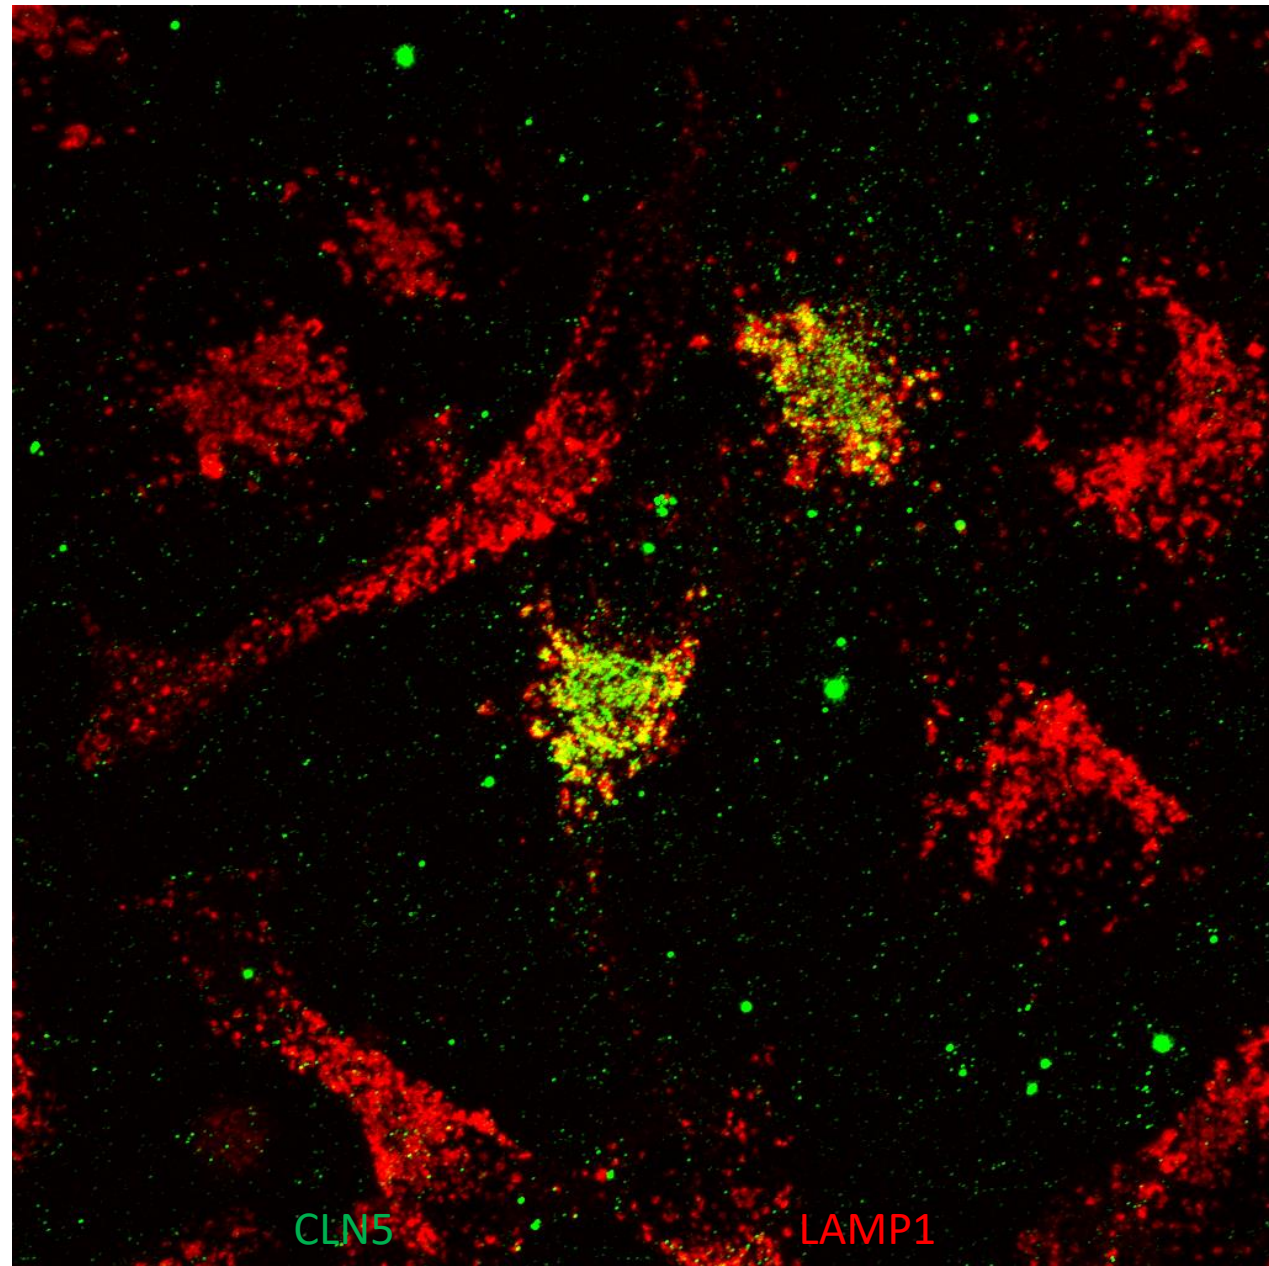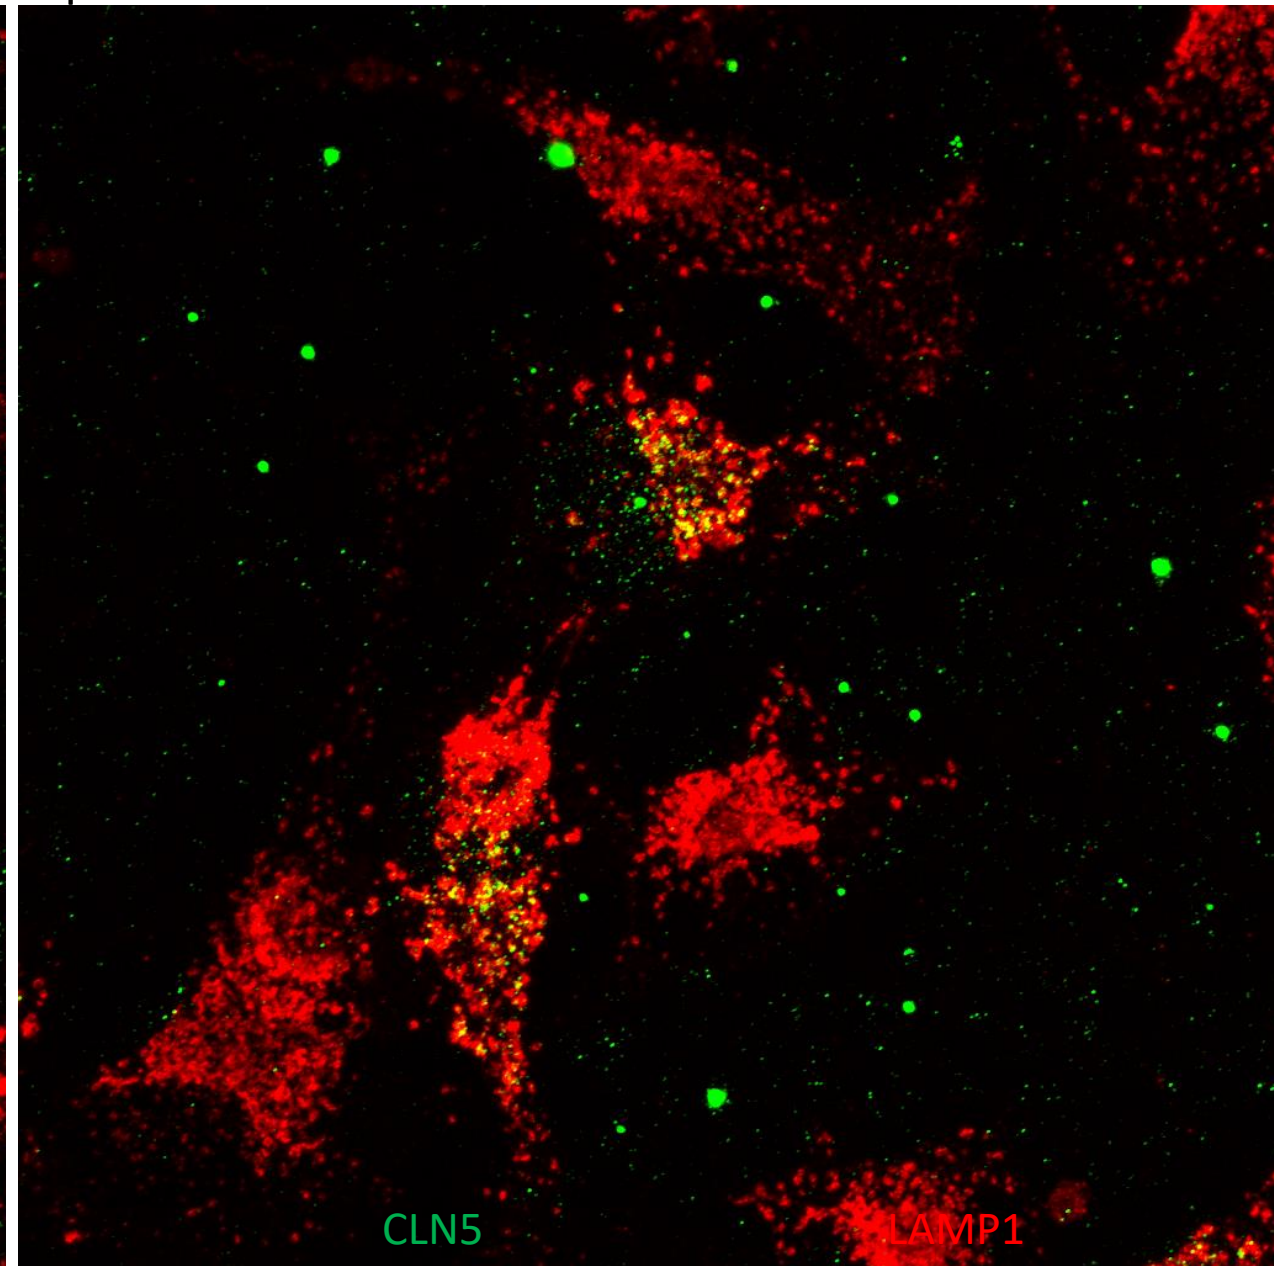

N320S CLN5 expression  
and co-localization with  
Lysosomal marker Lamp1

# N320S CLN5 expression

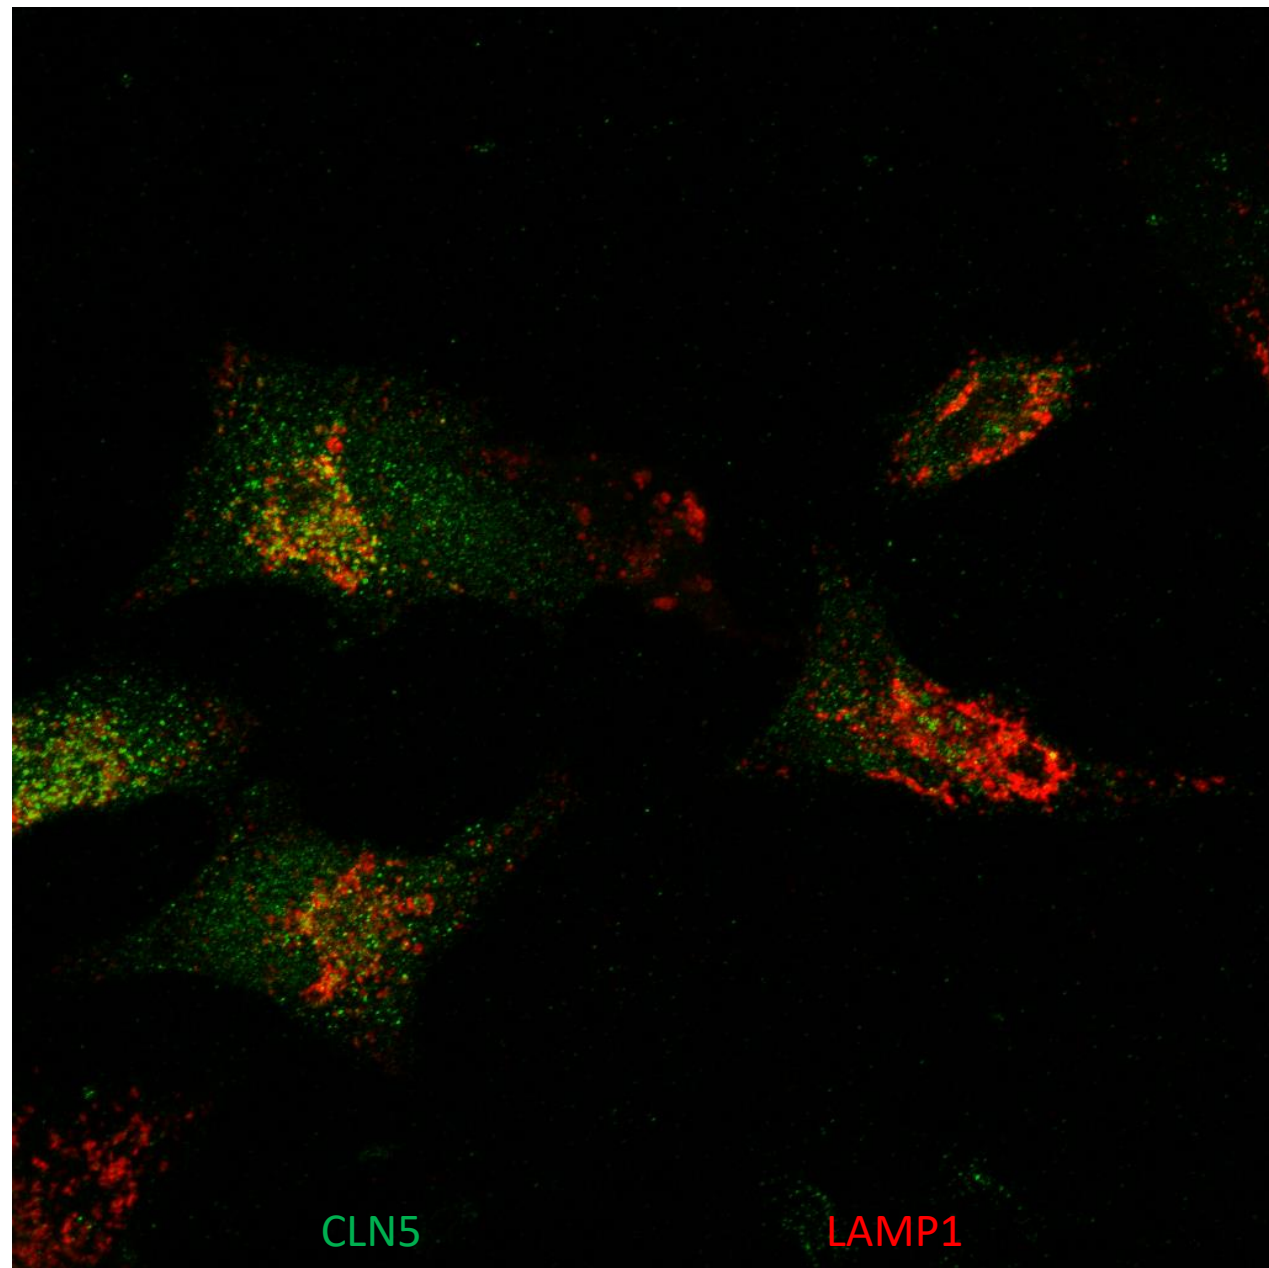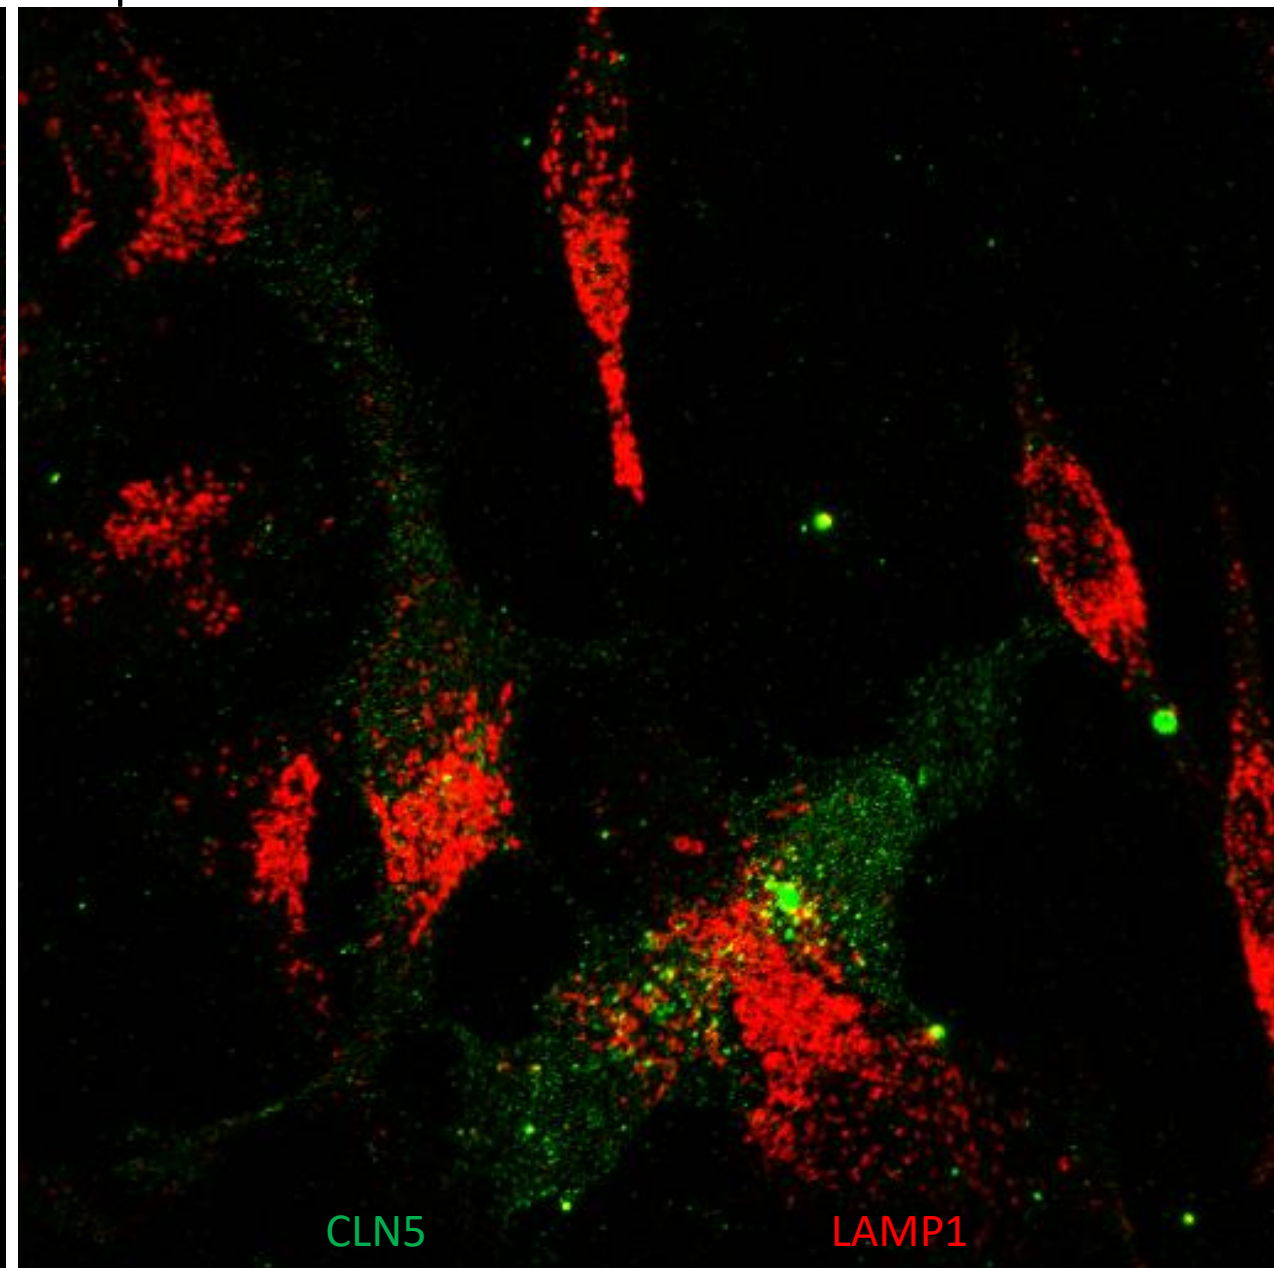

# N320S CLN5 expression

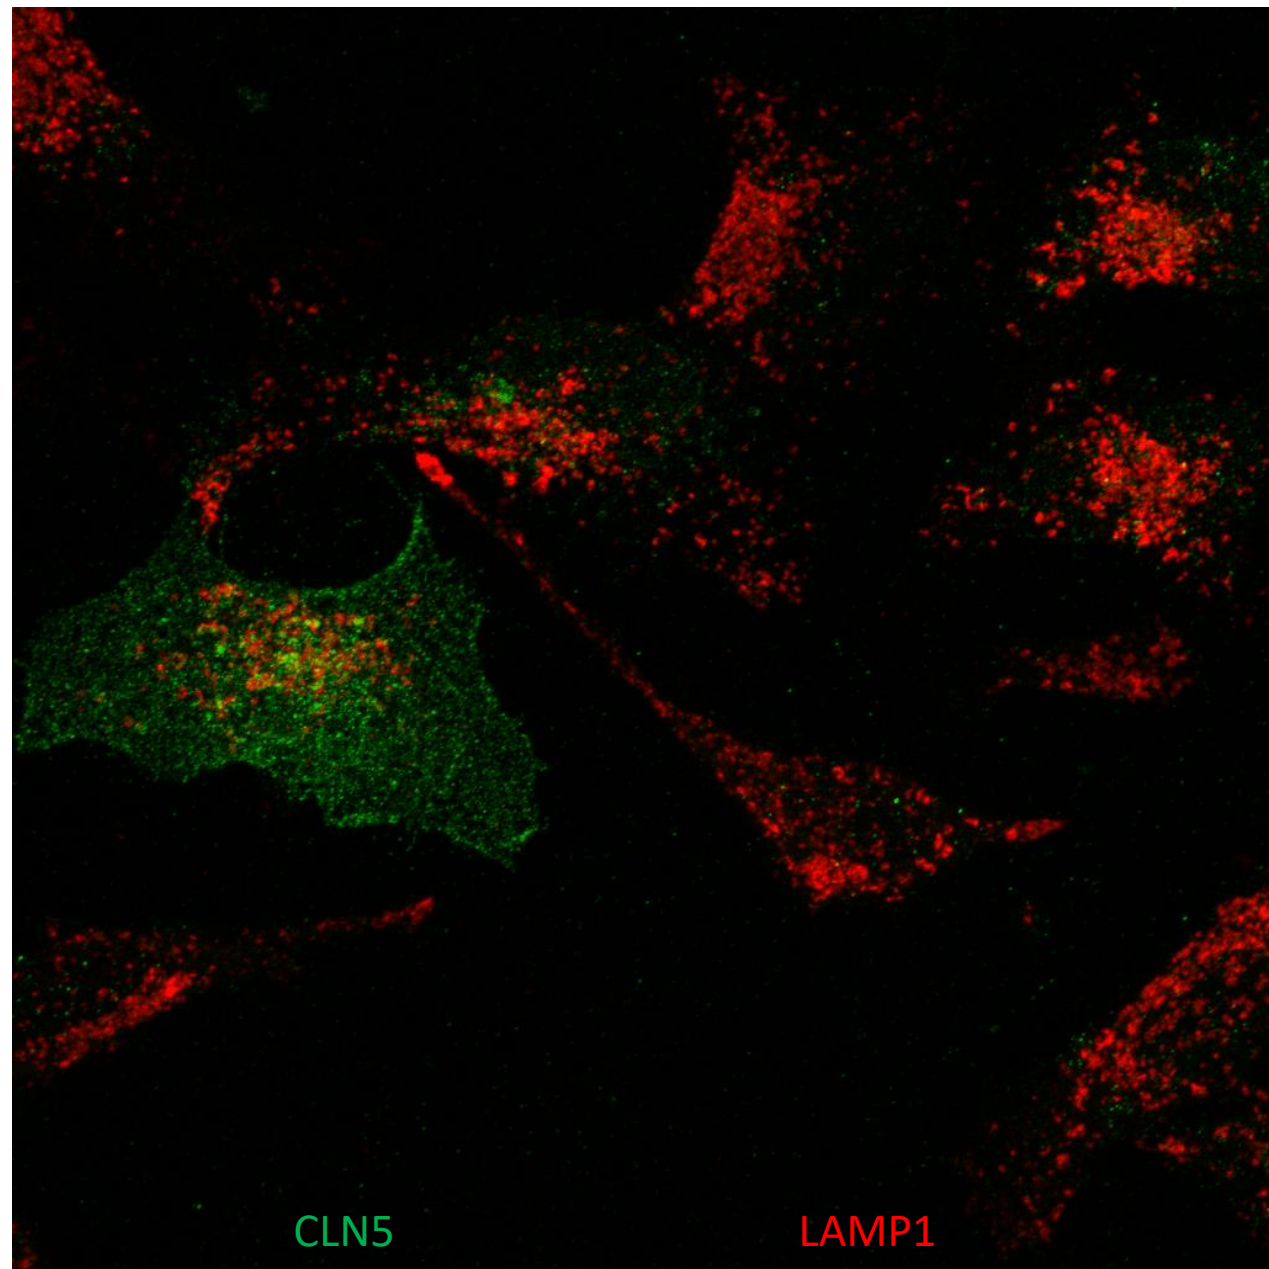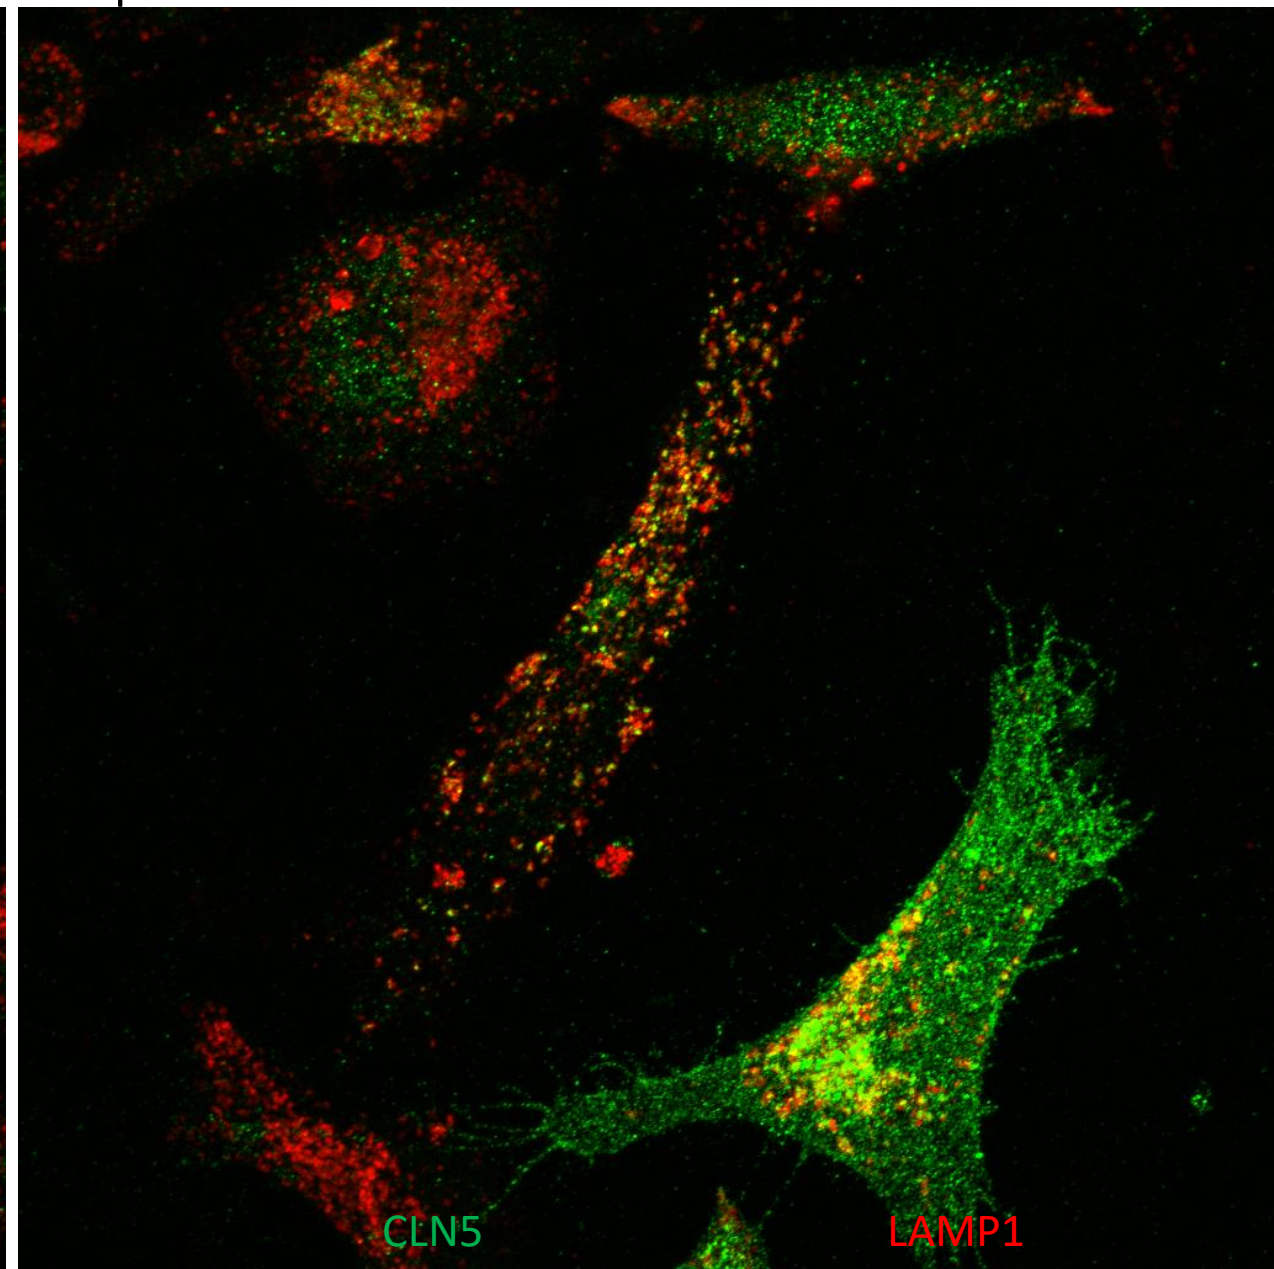

# N320S CLN5 expression

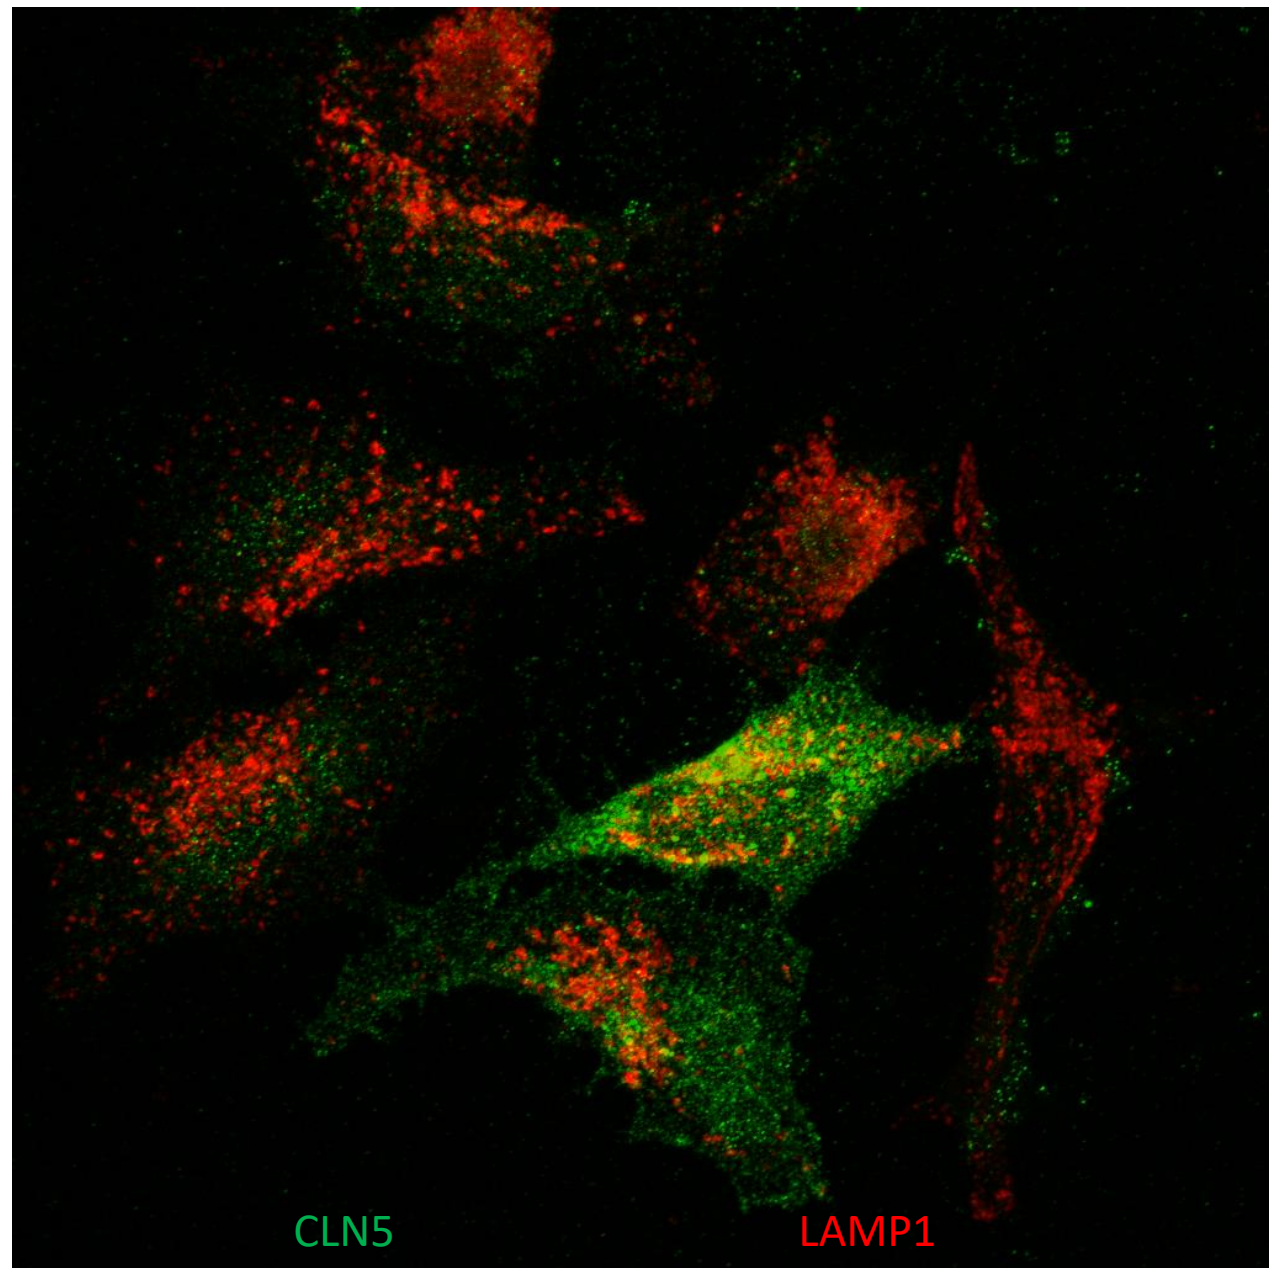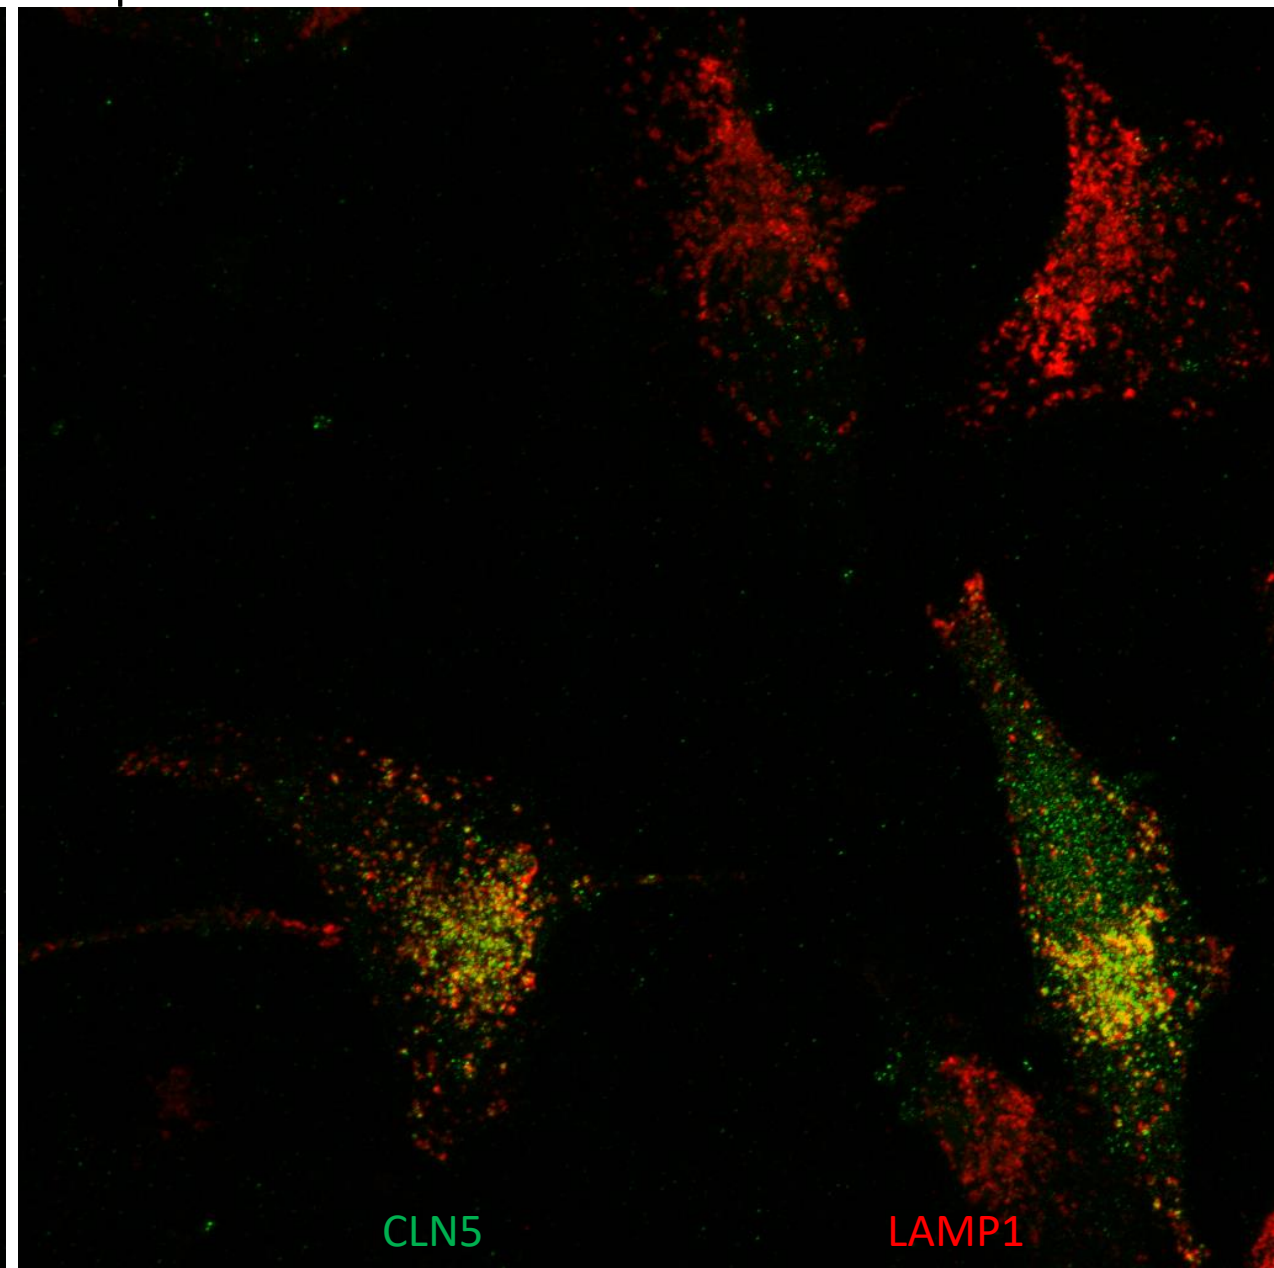

# N320S CLN5 expression

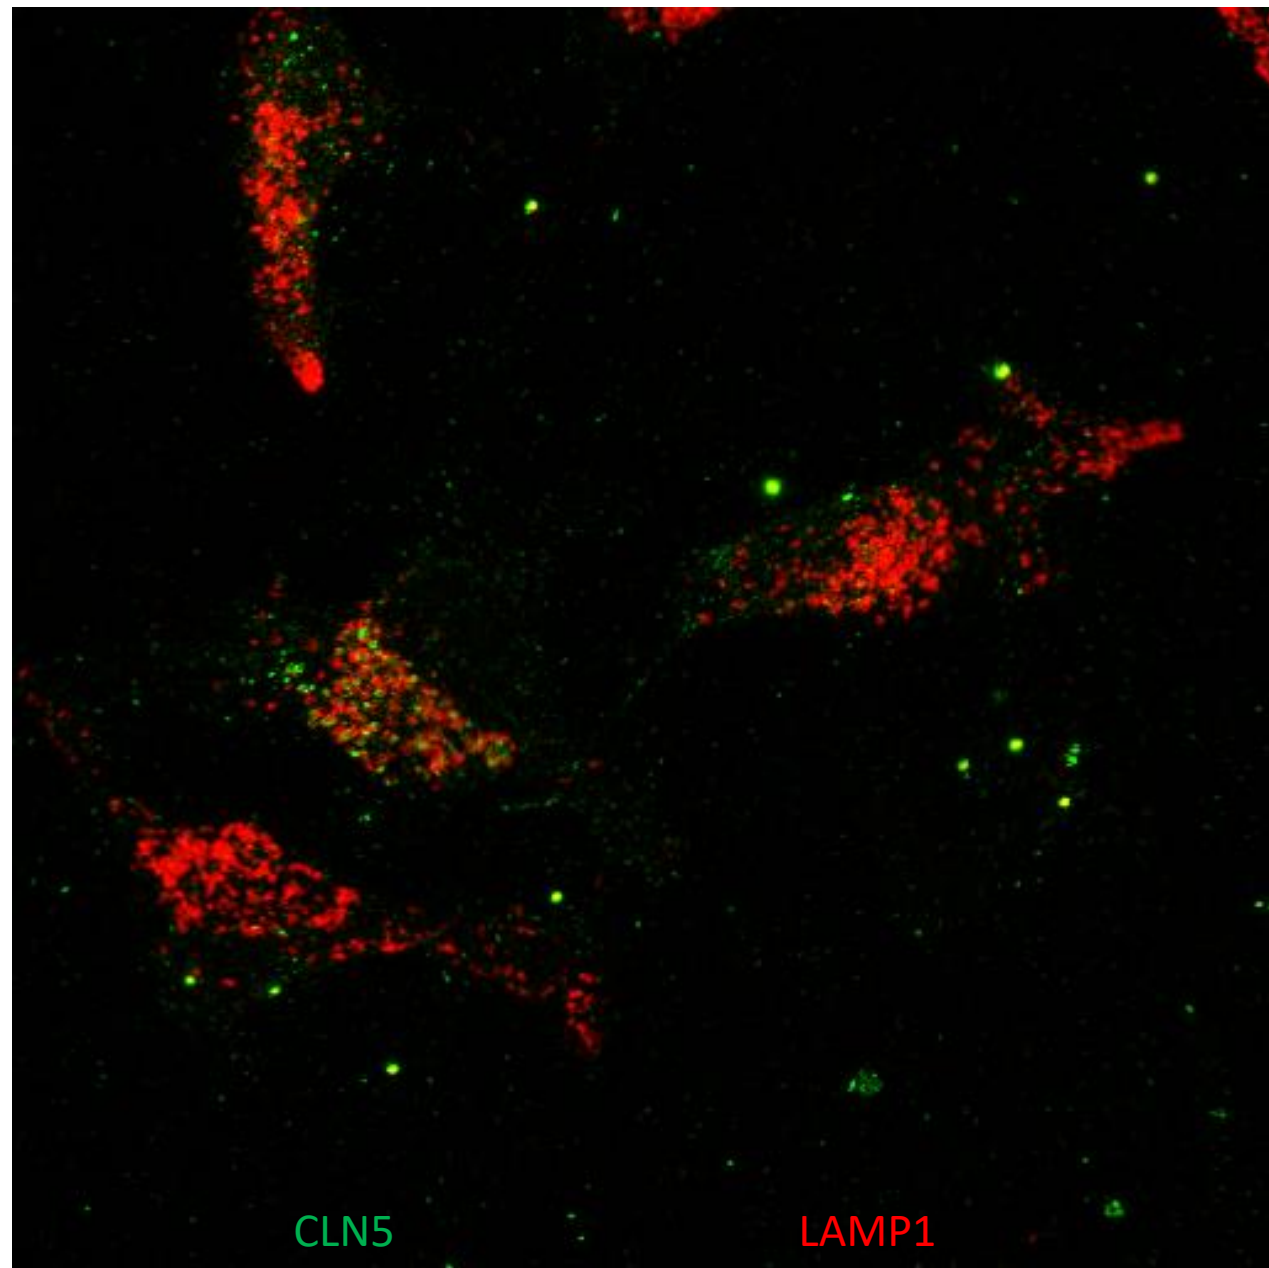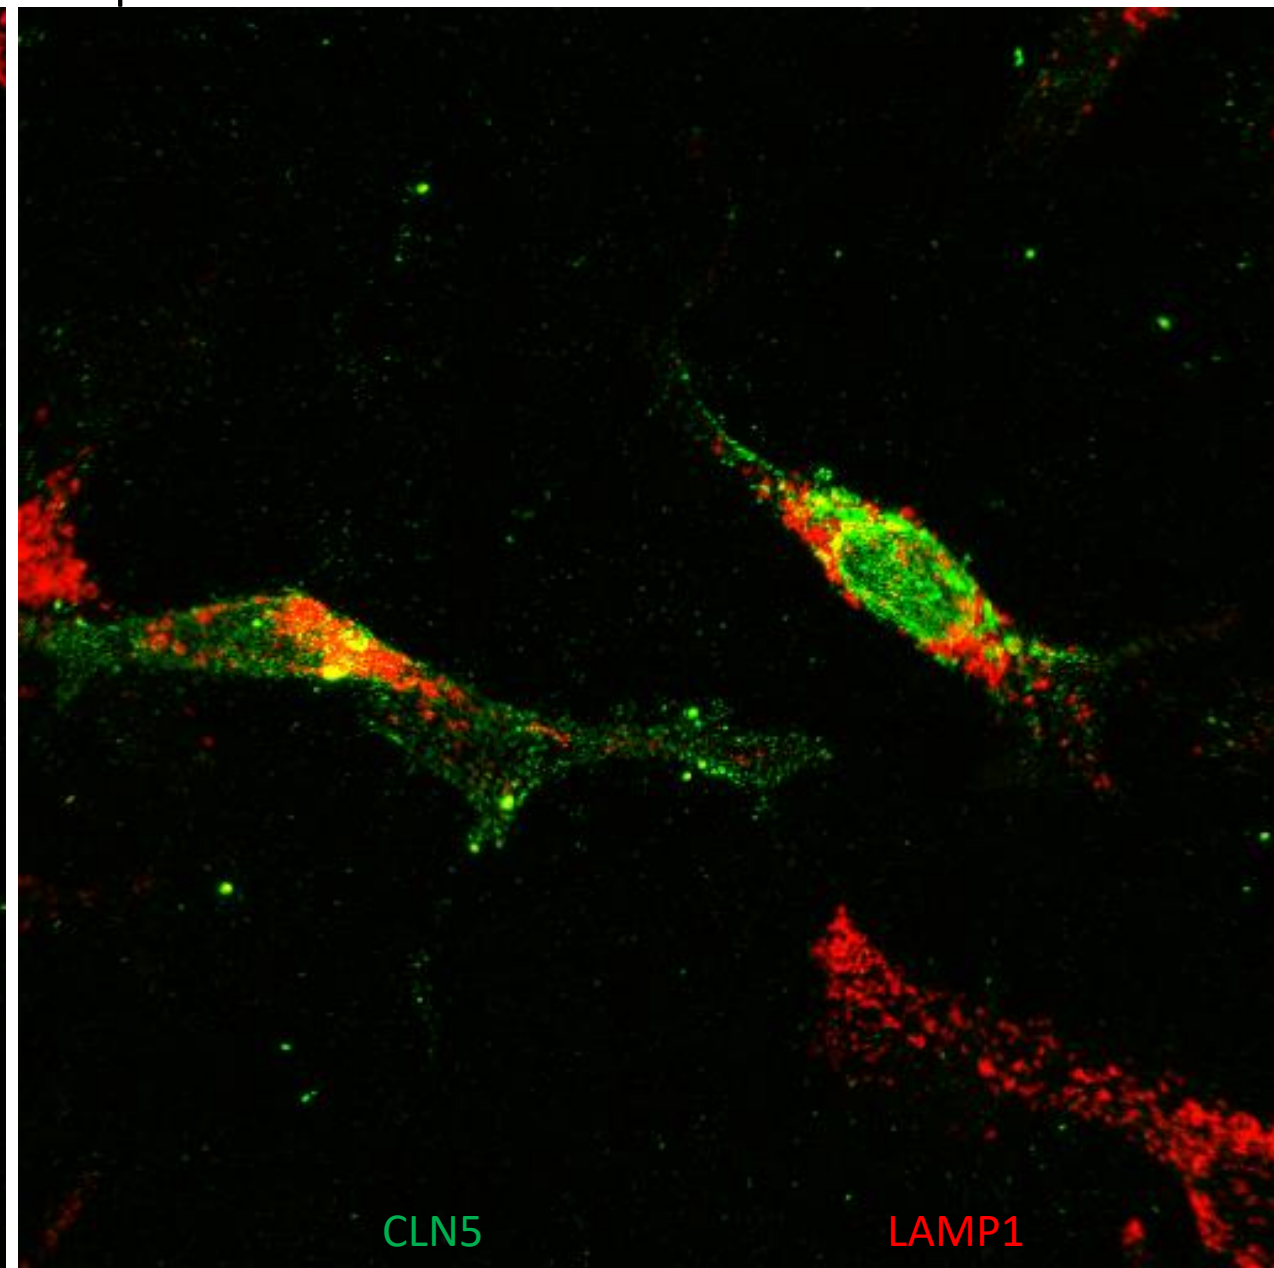

# N320S CLN5 expression

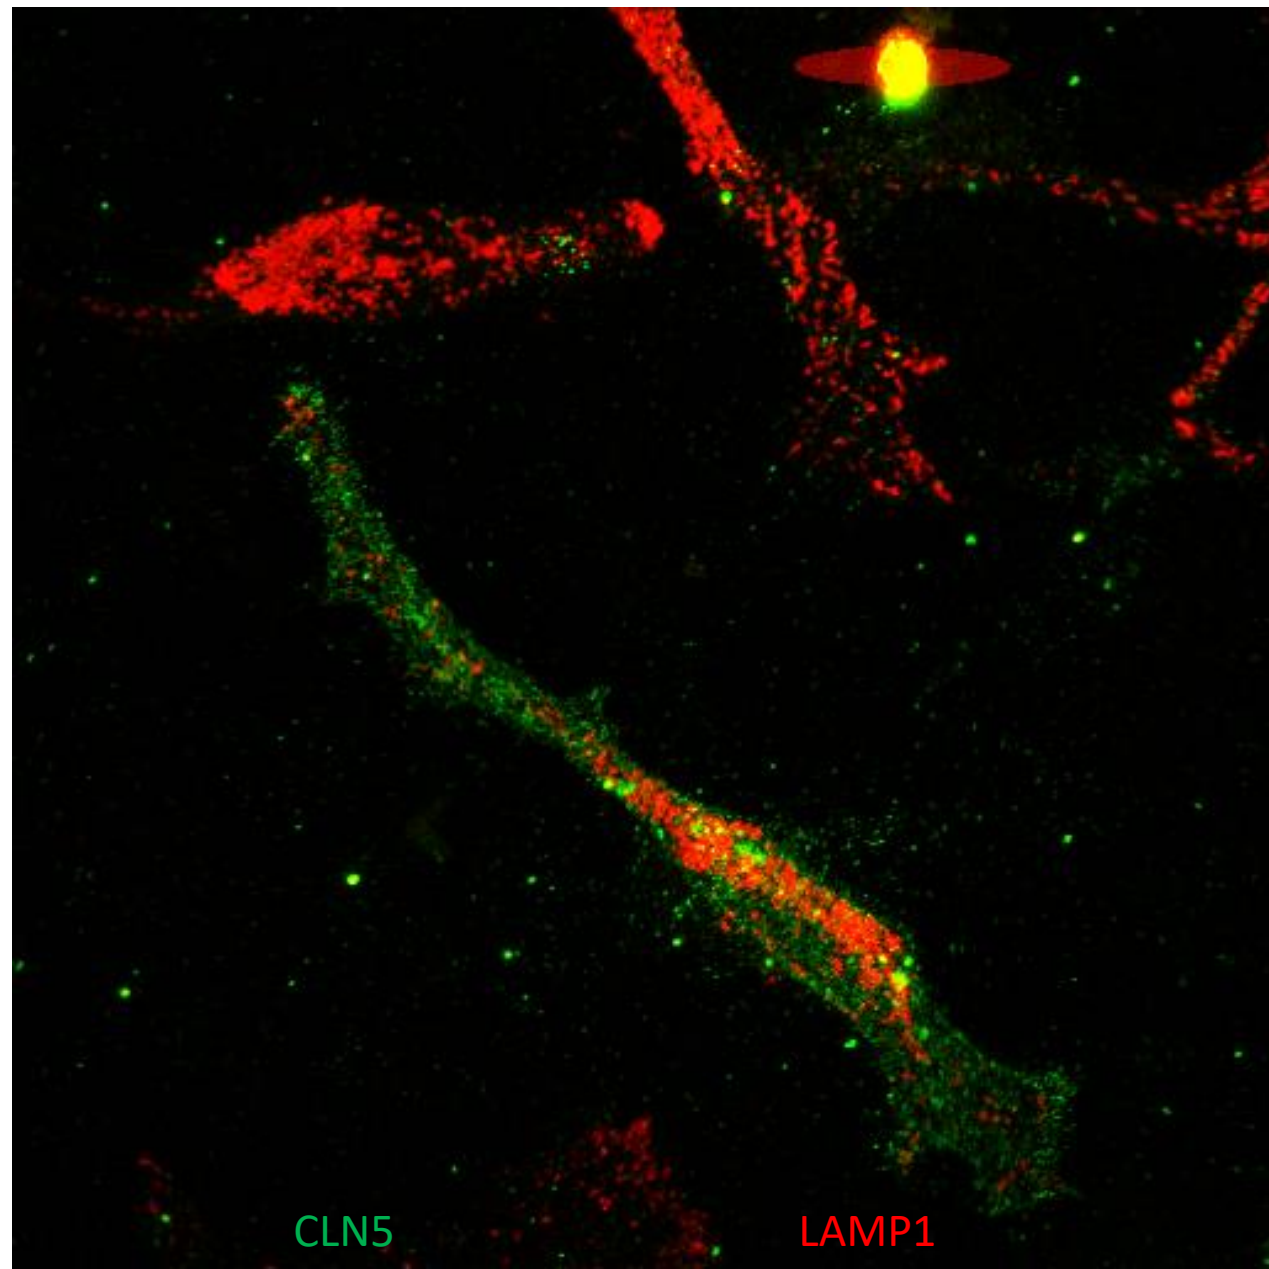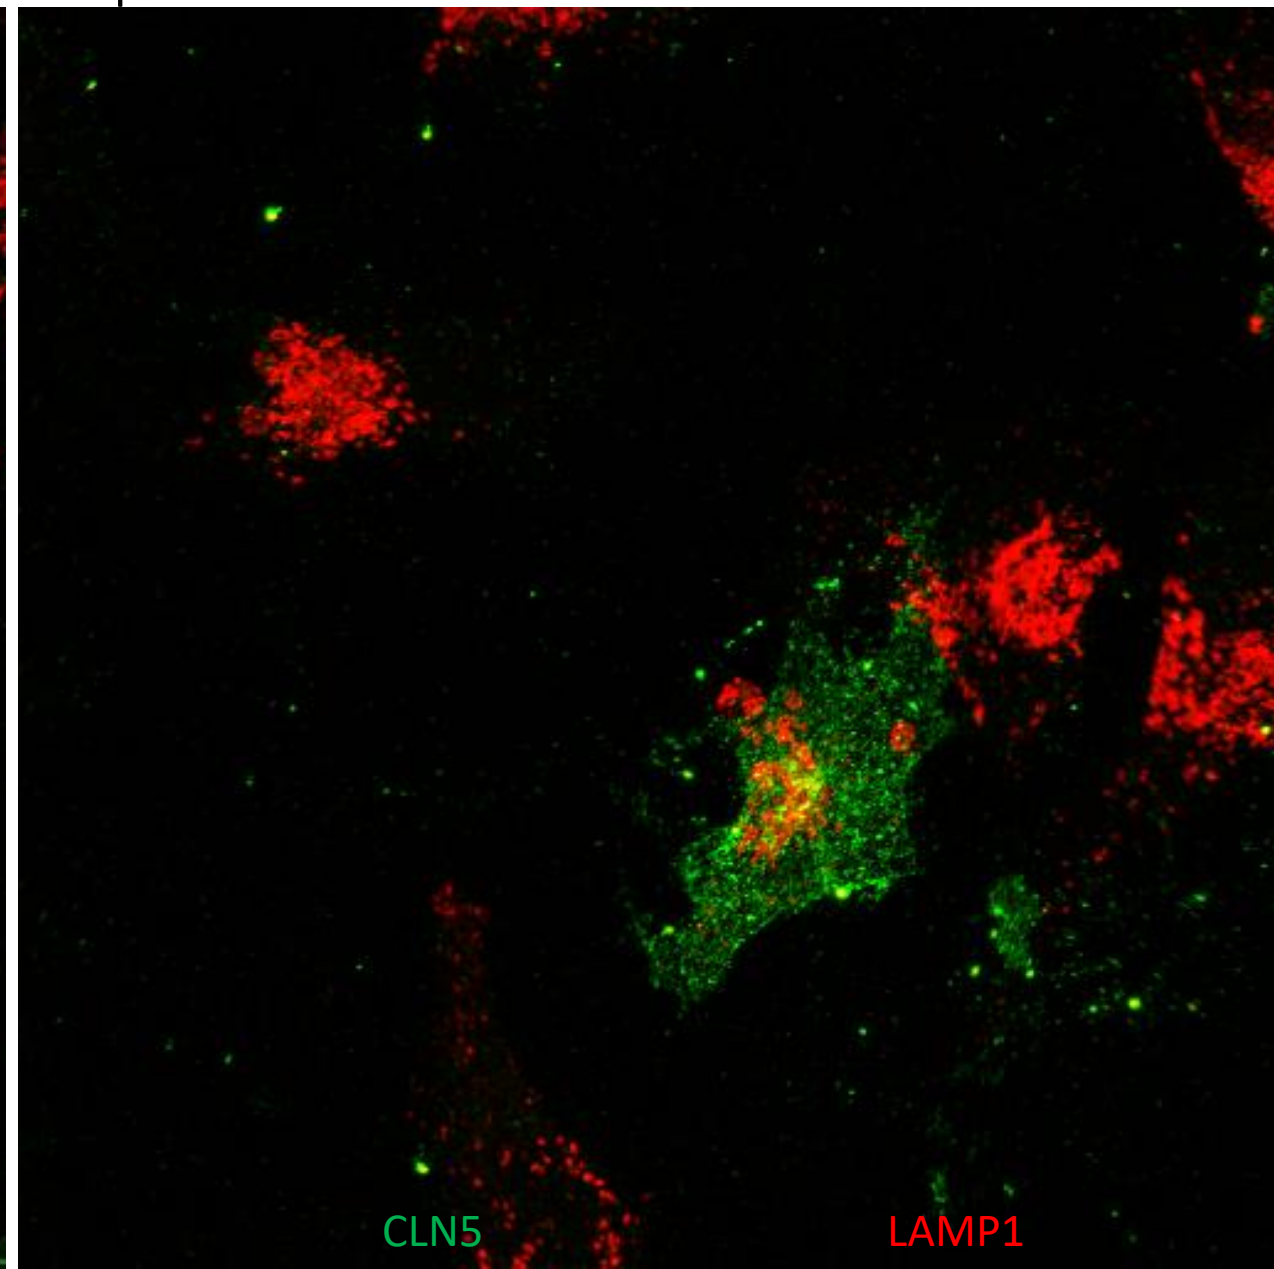



# N320S CLN5 expression

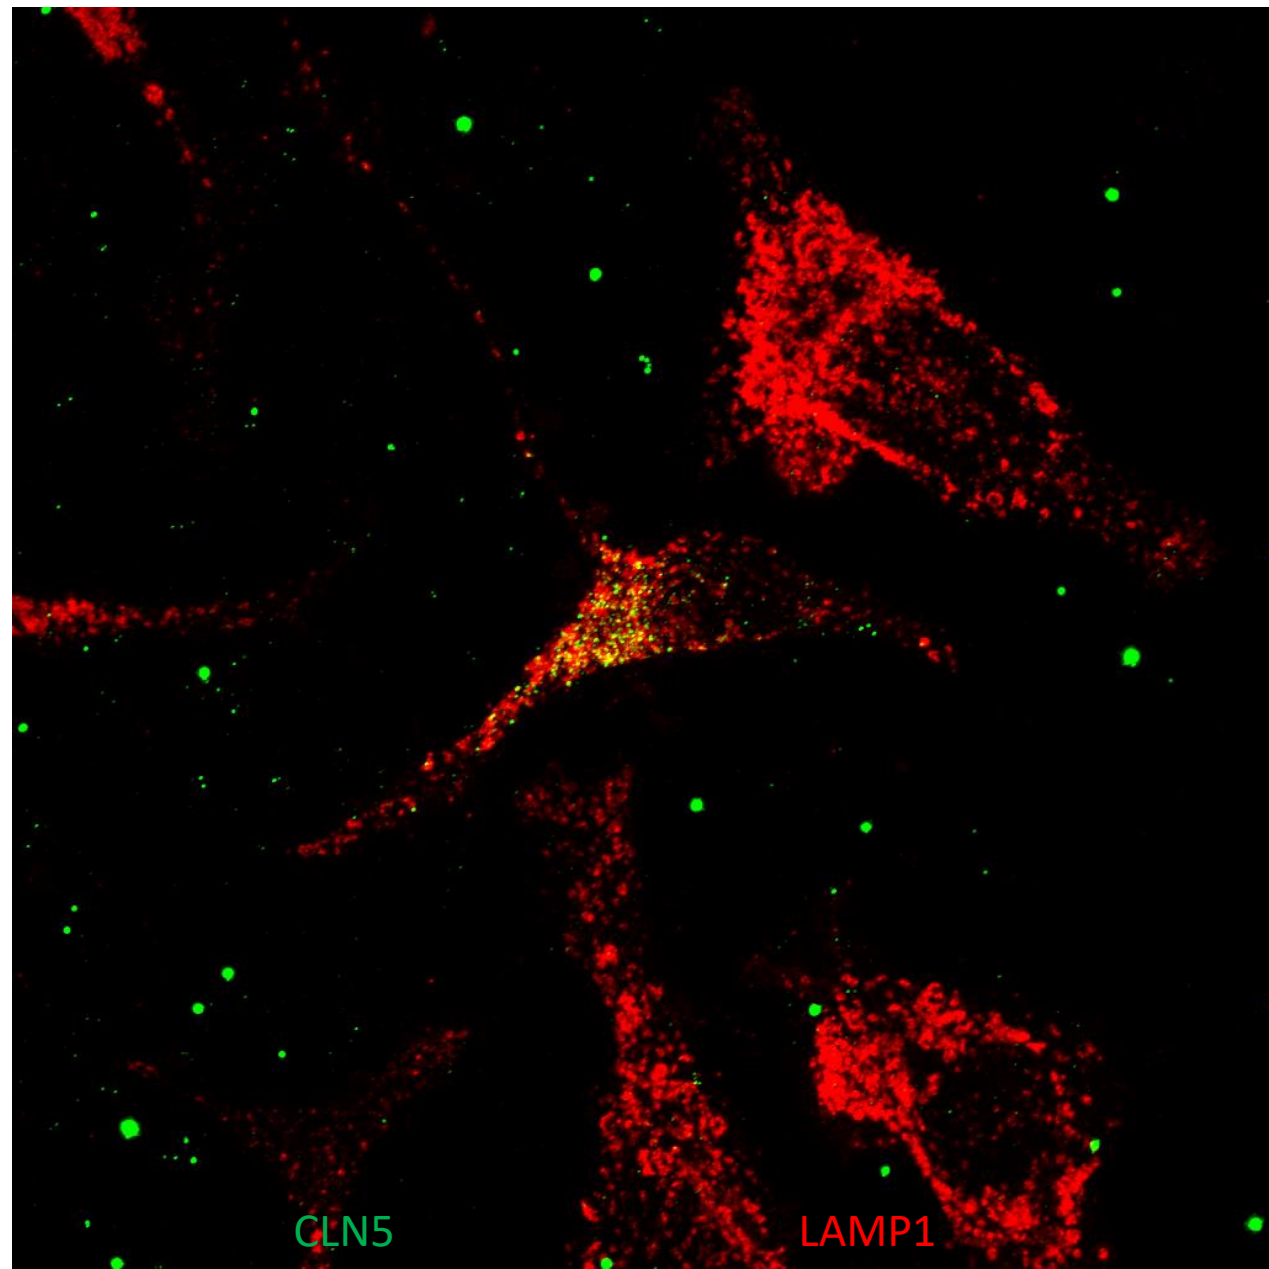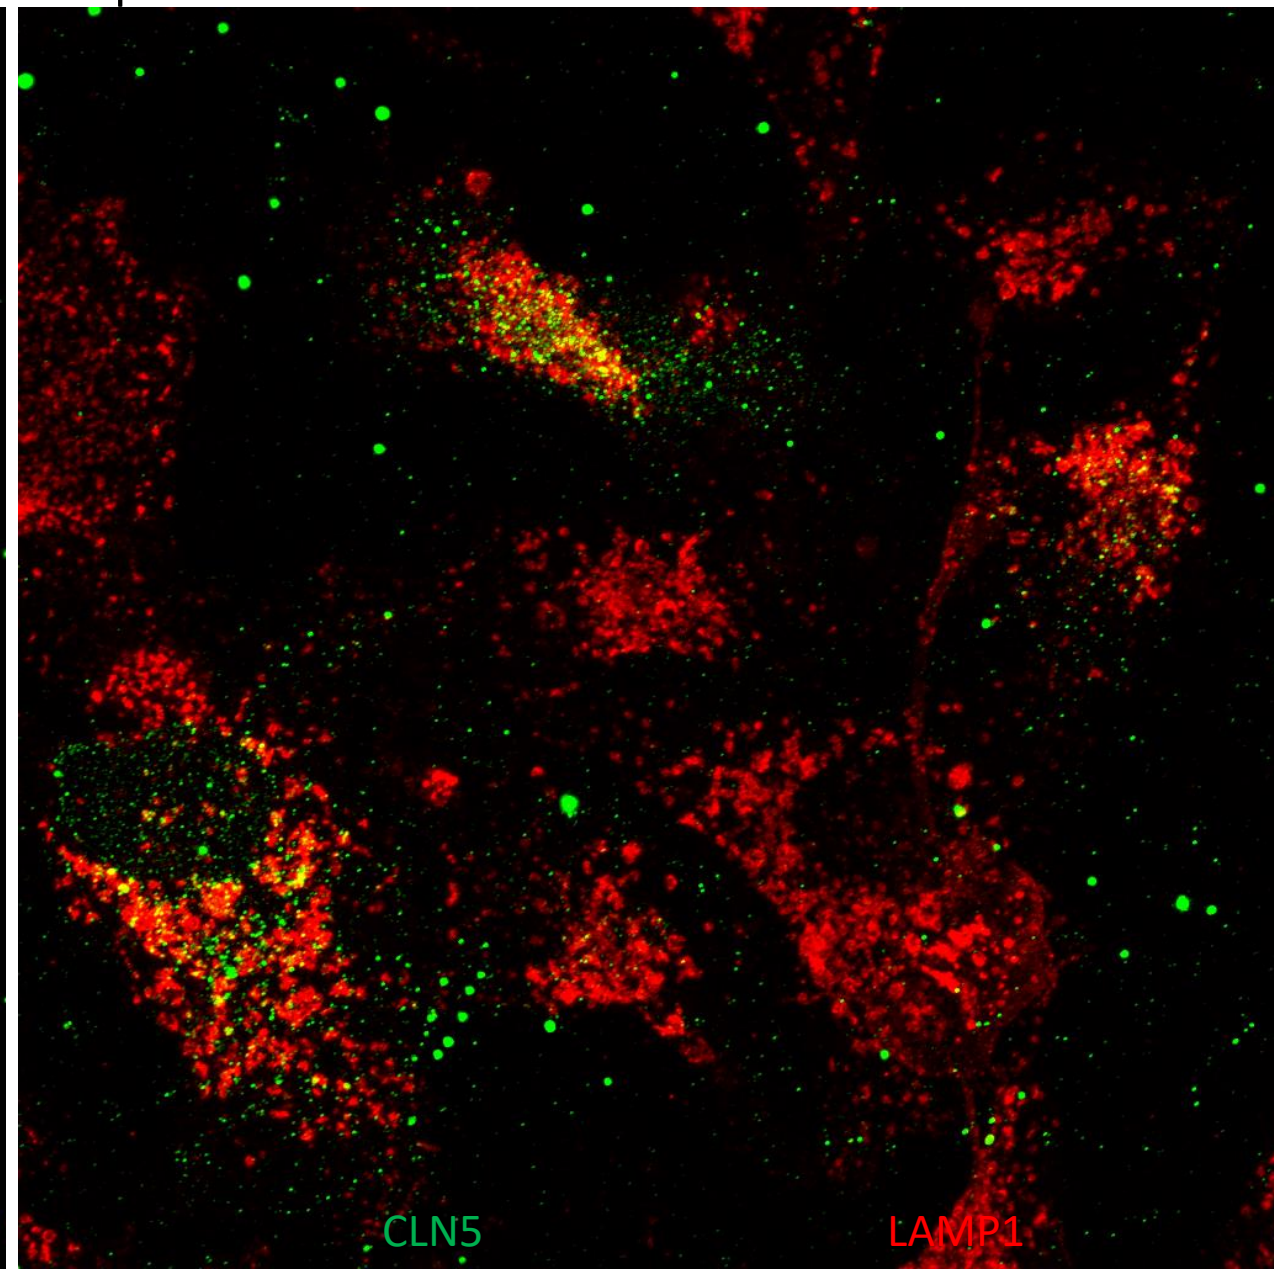

# N320S CLN5 expression

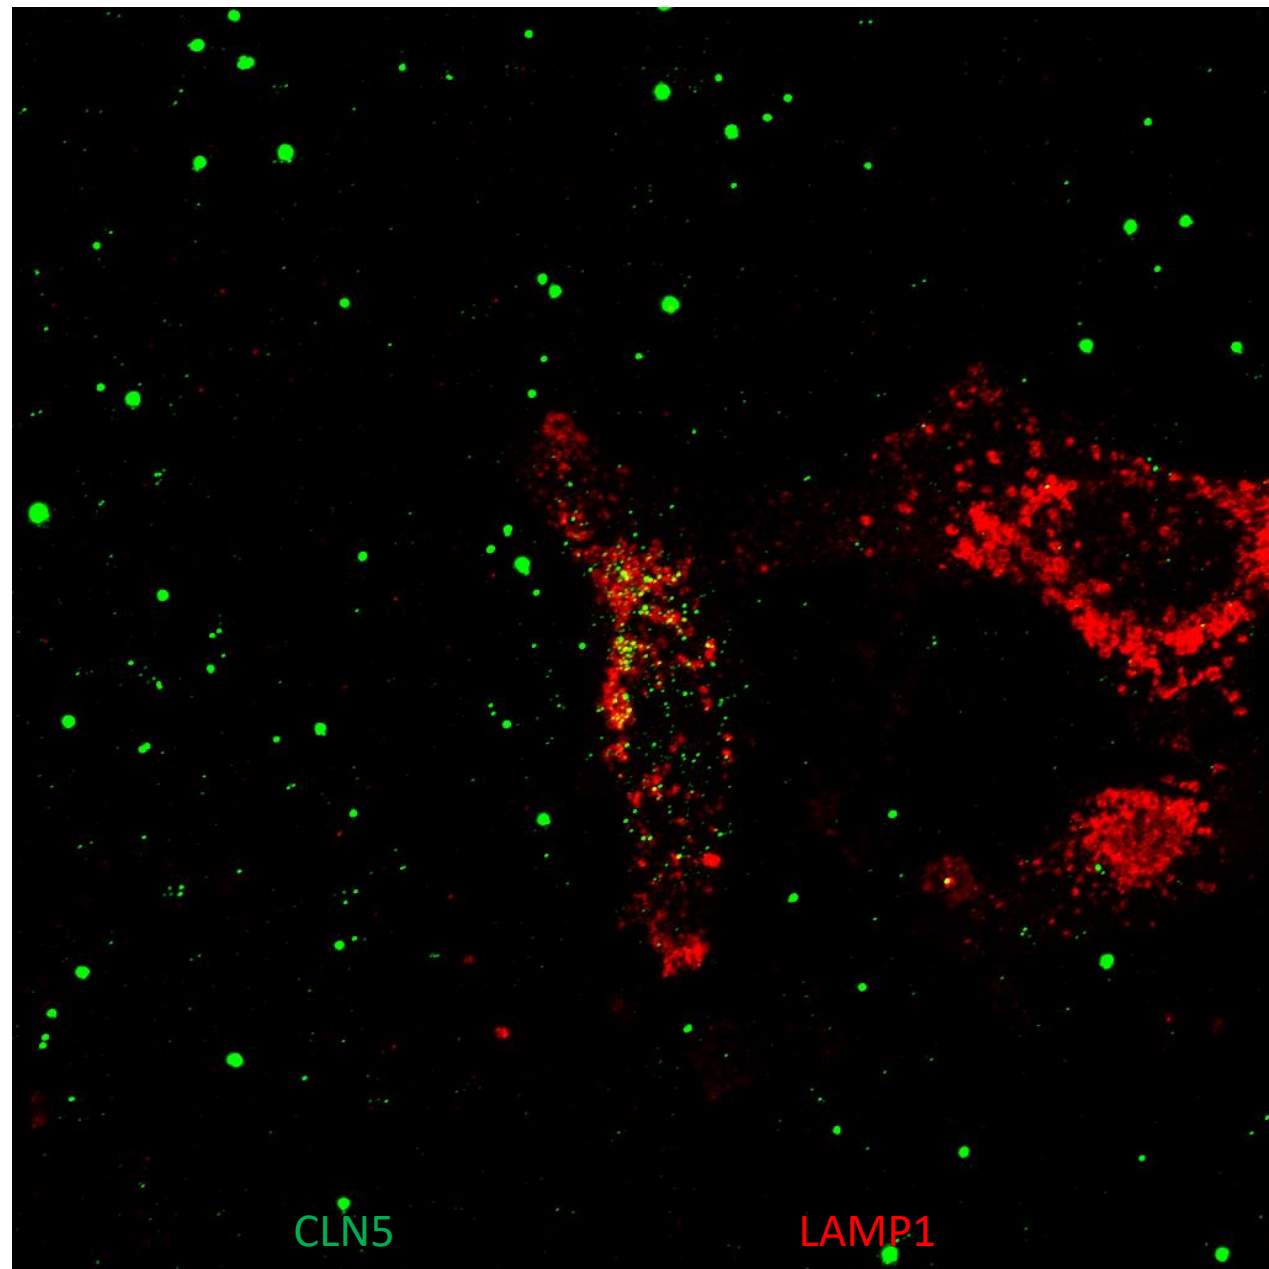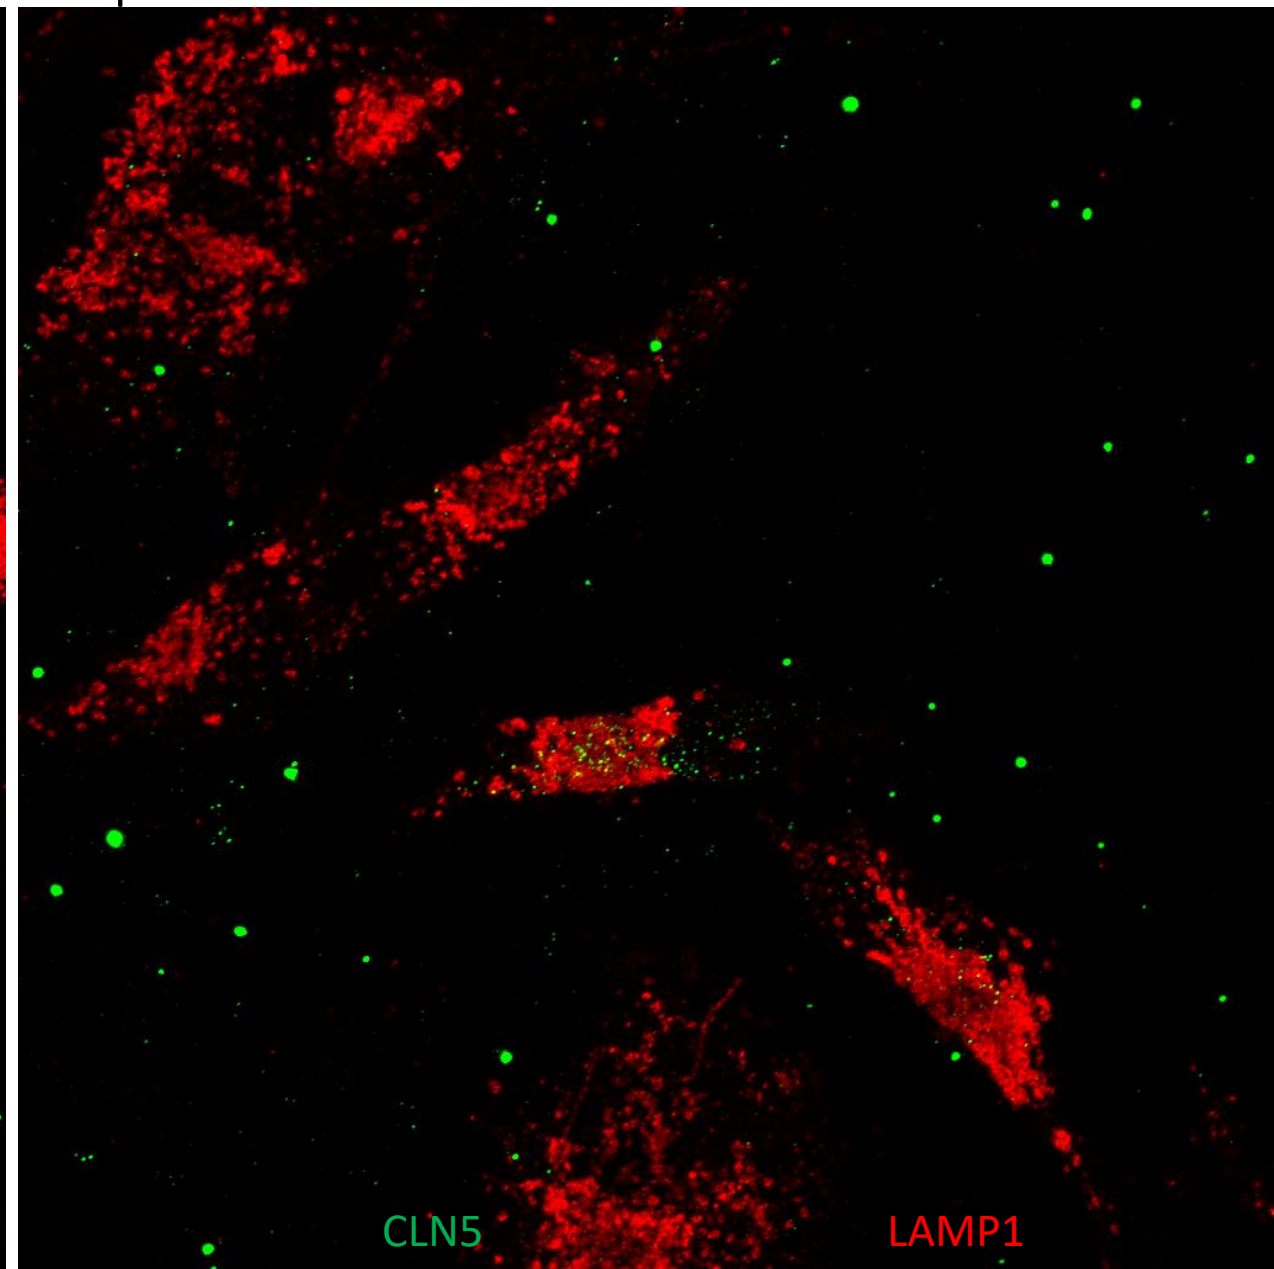

# N320S CLN5 expression

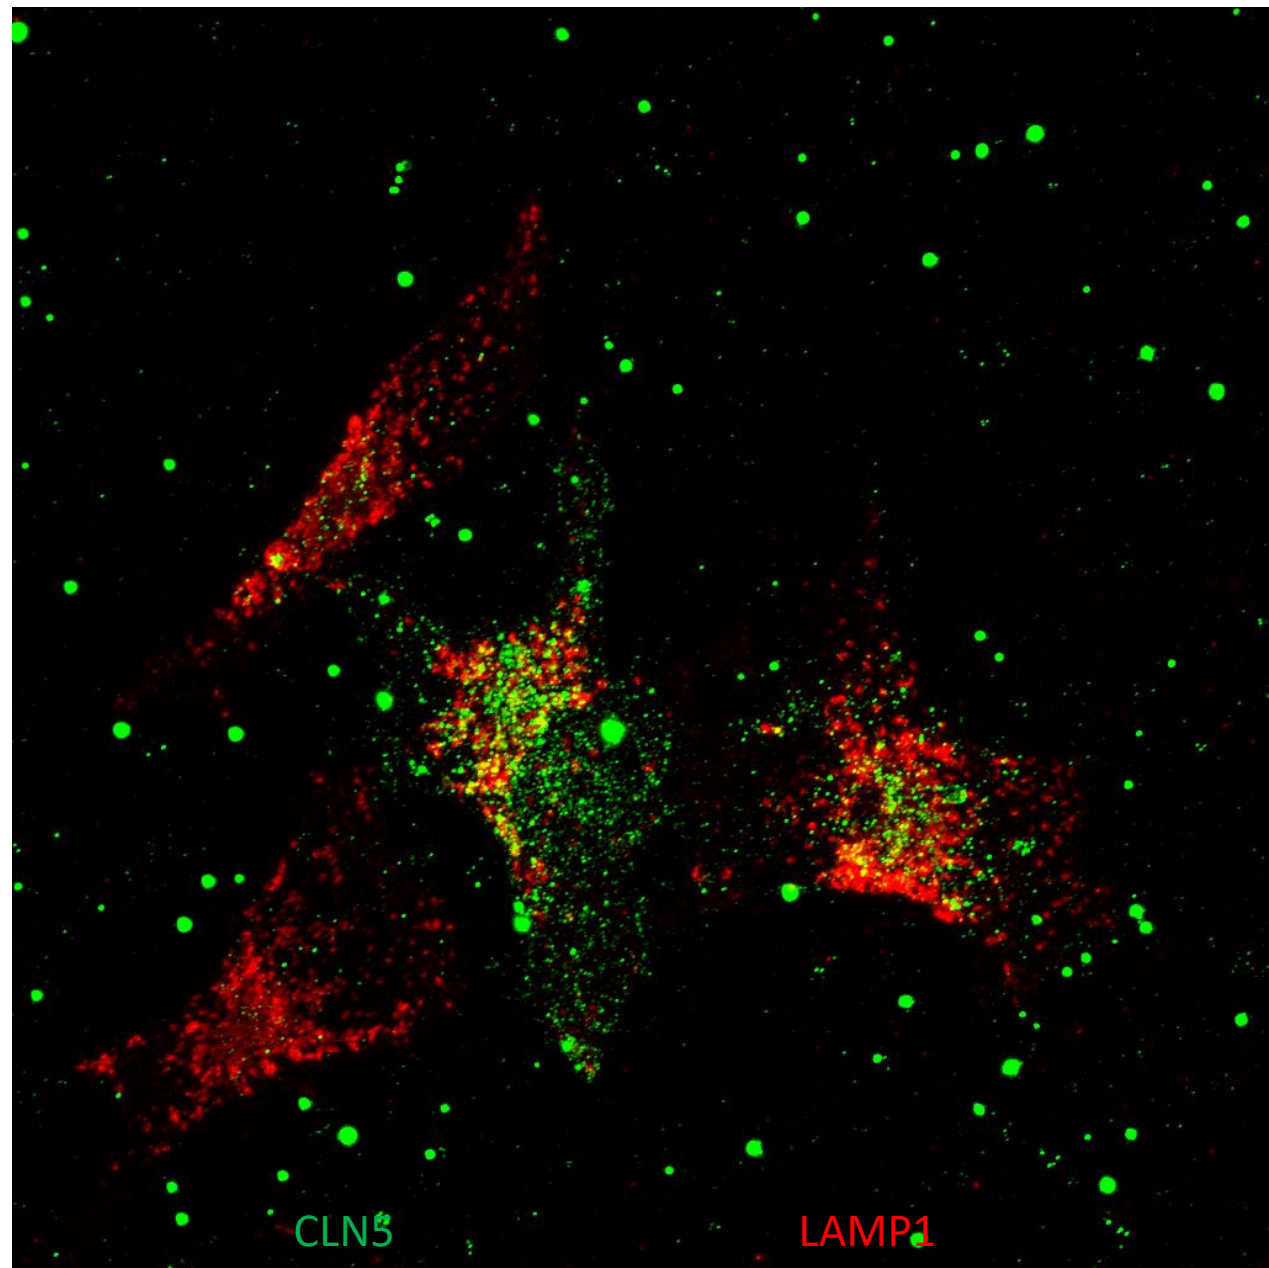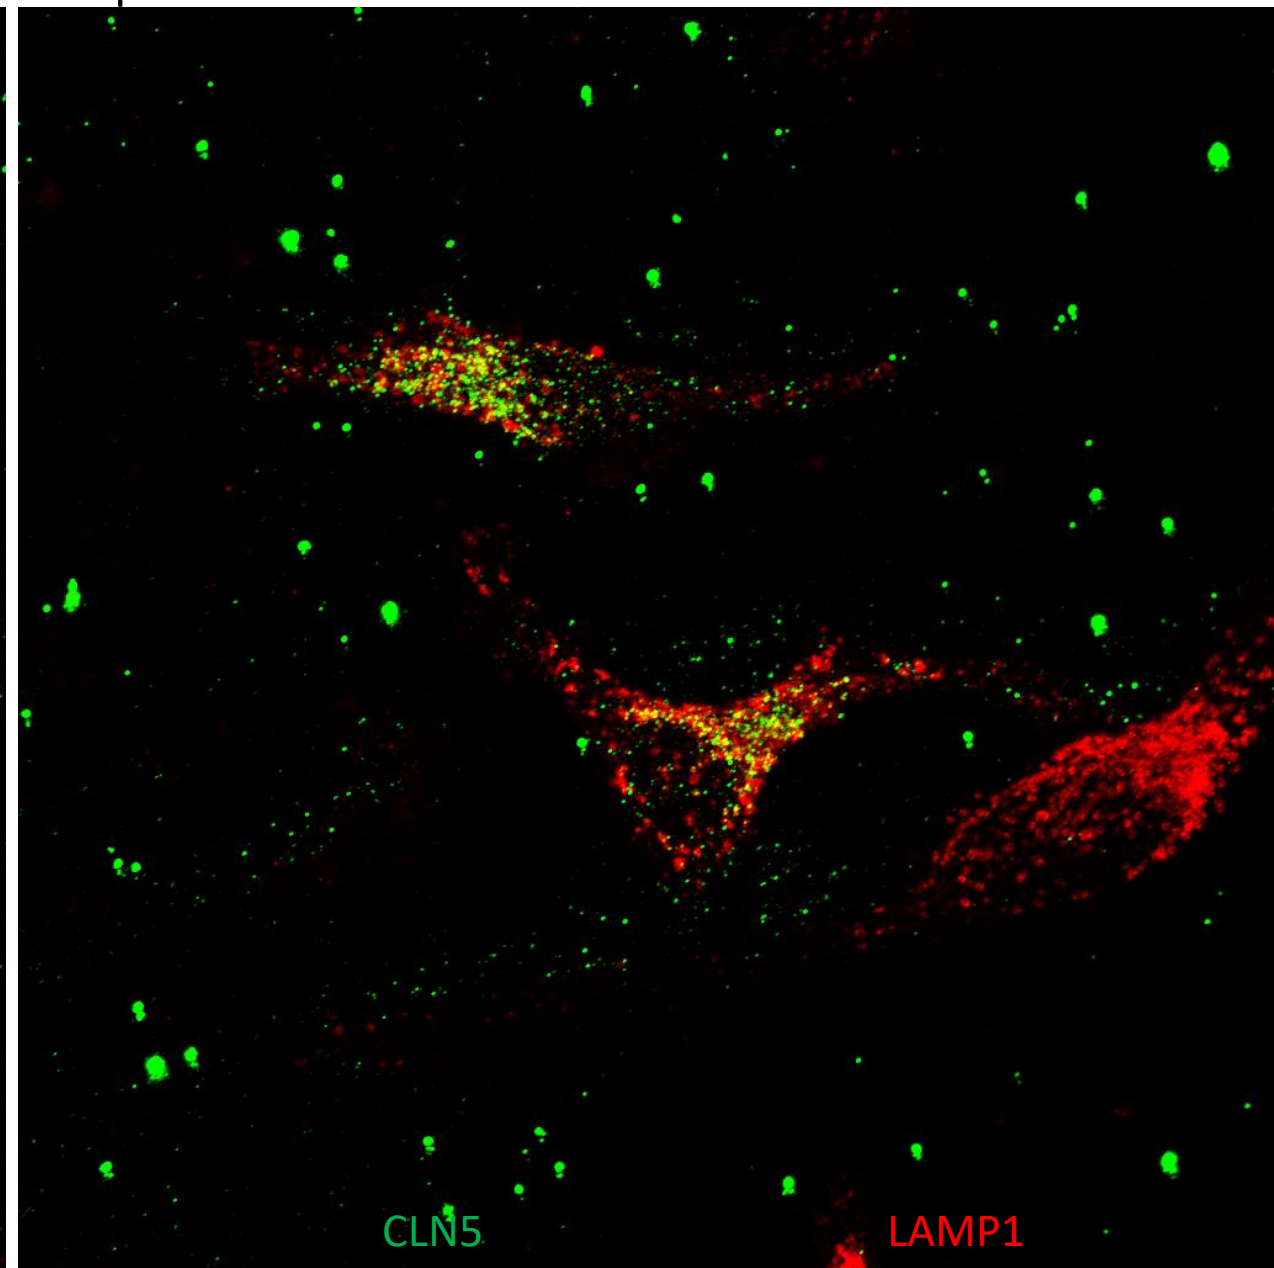

WT CLN5 expression  
and co-localization with  
ER marker Calnexin

WT CLN5 expression

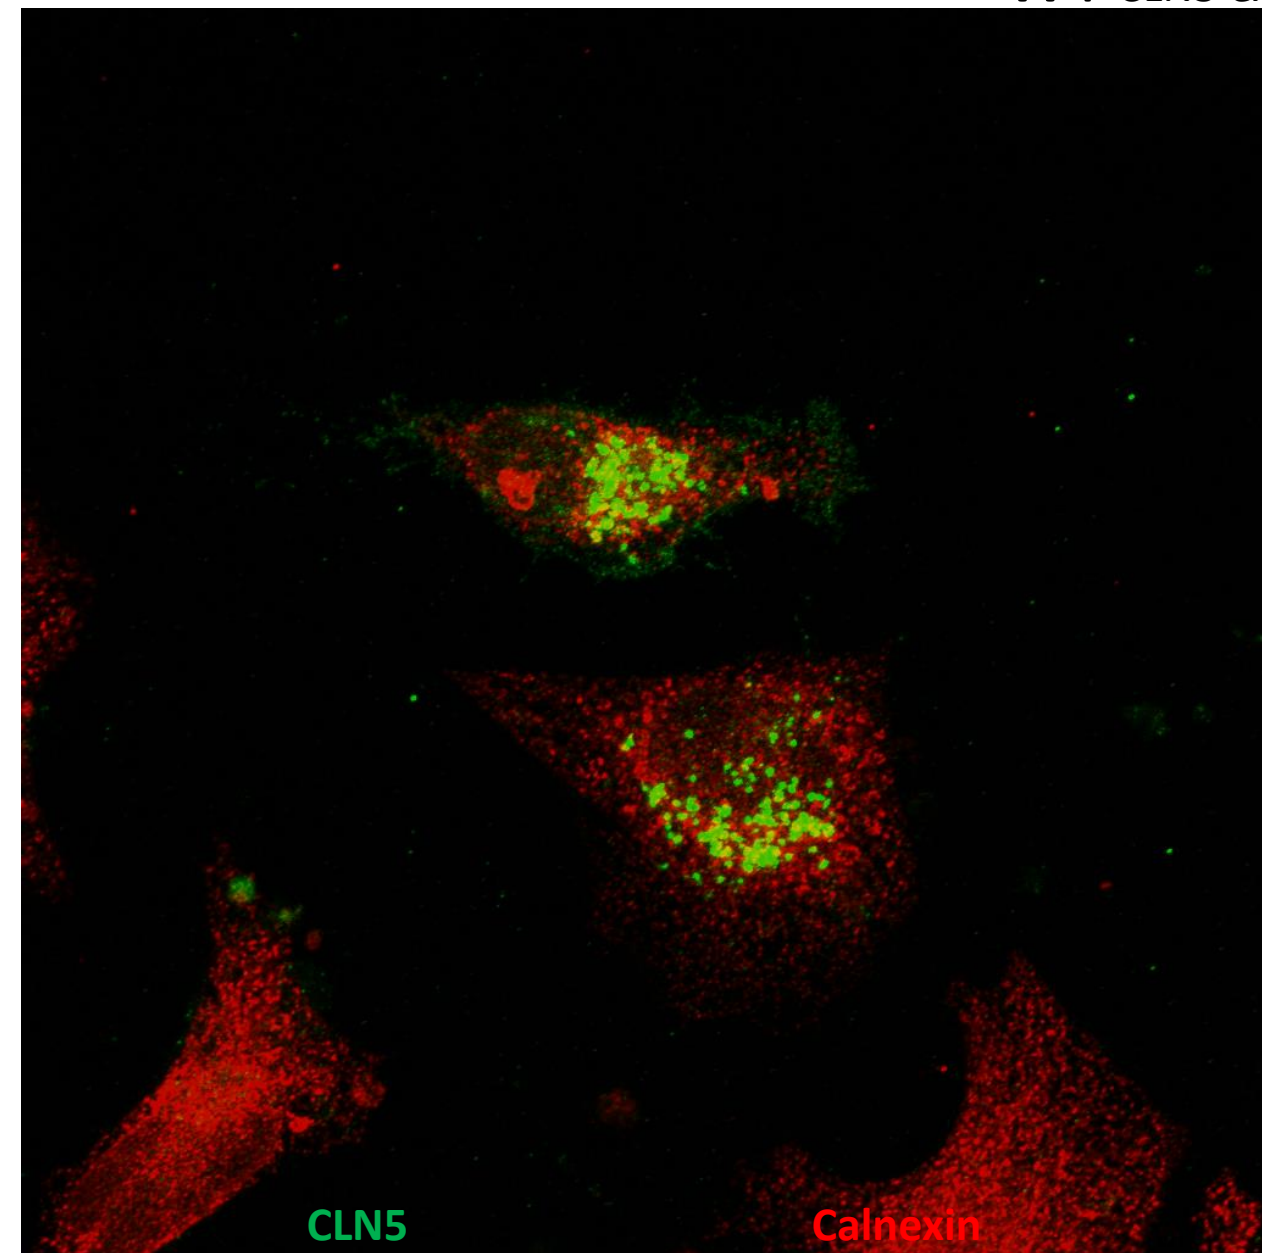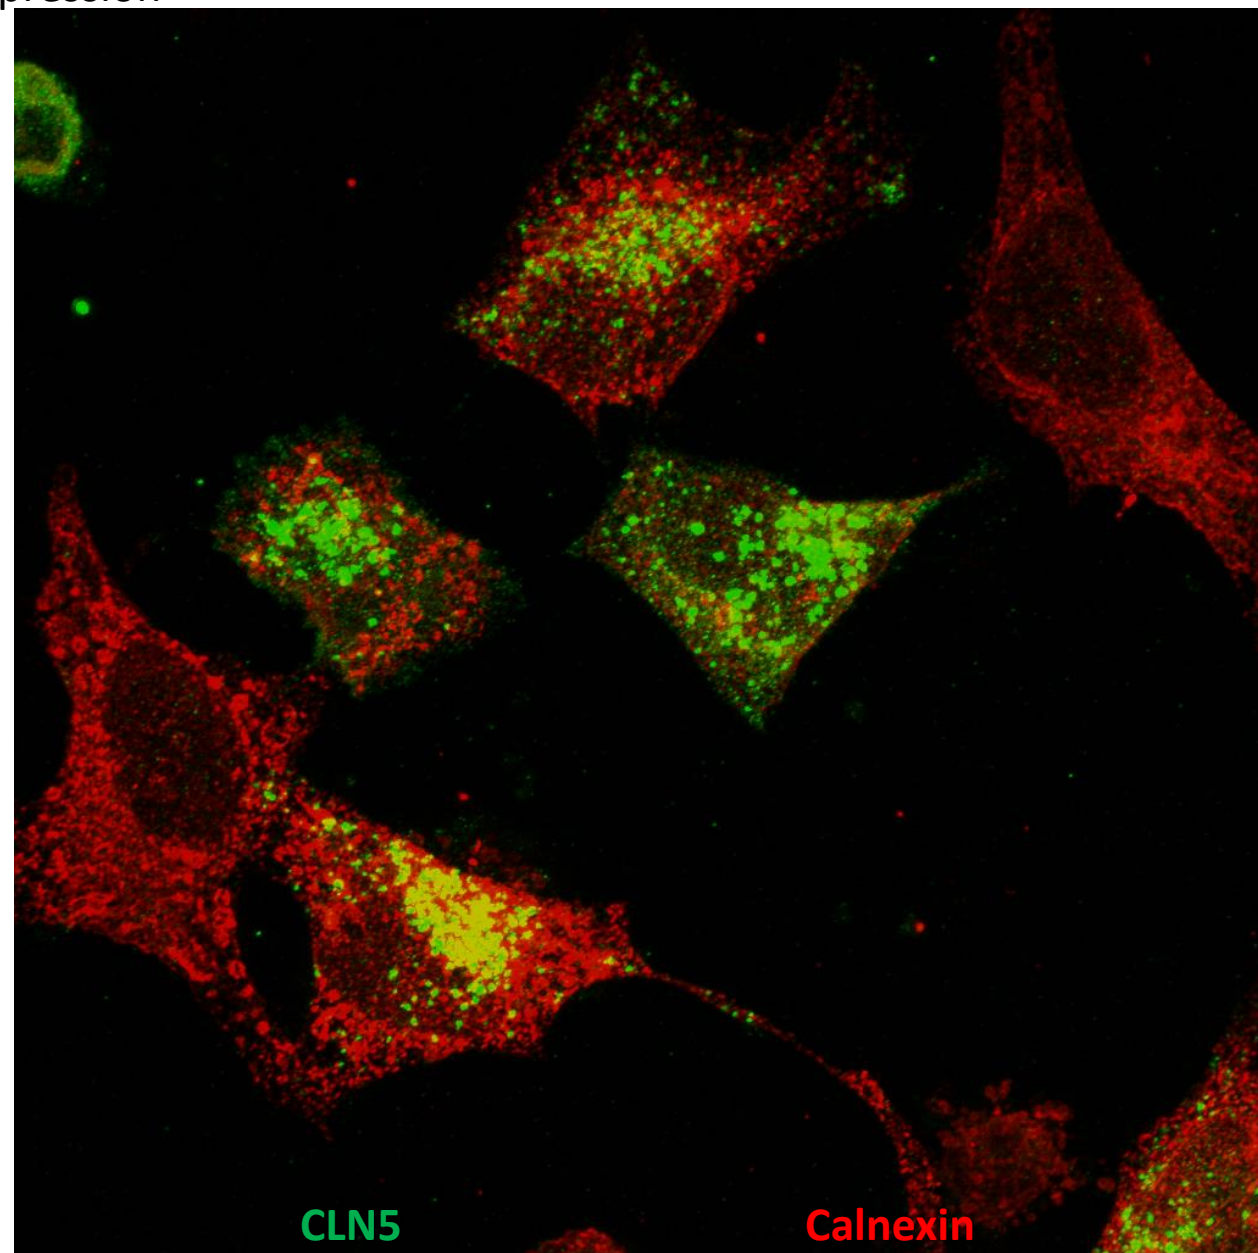

WT CLN5 expression

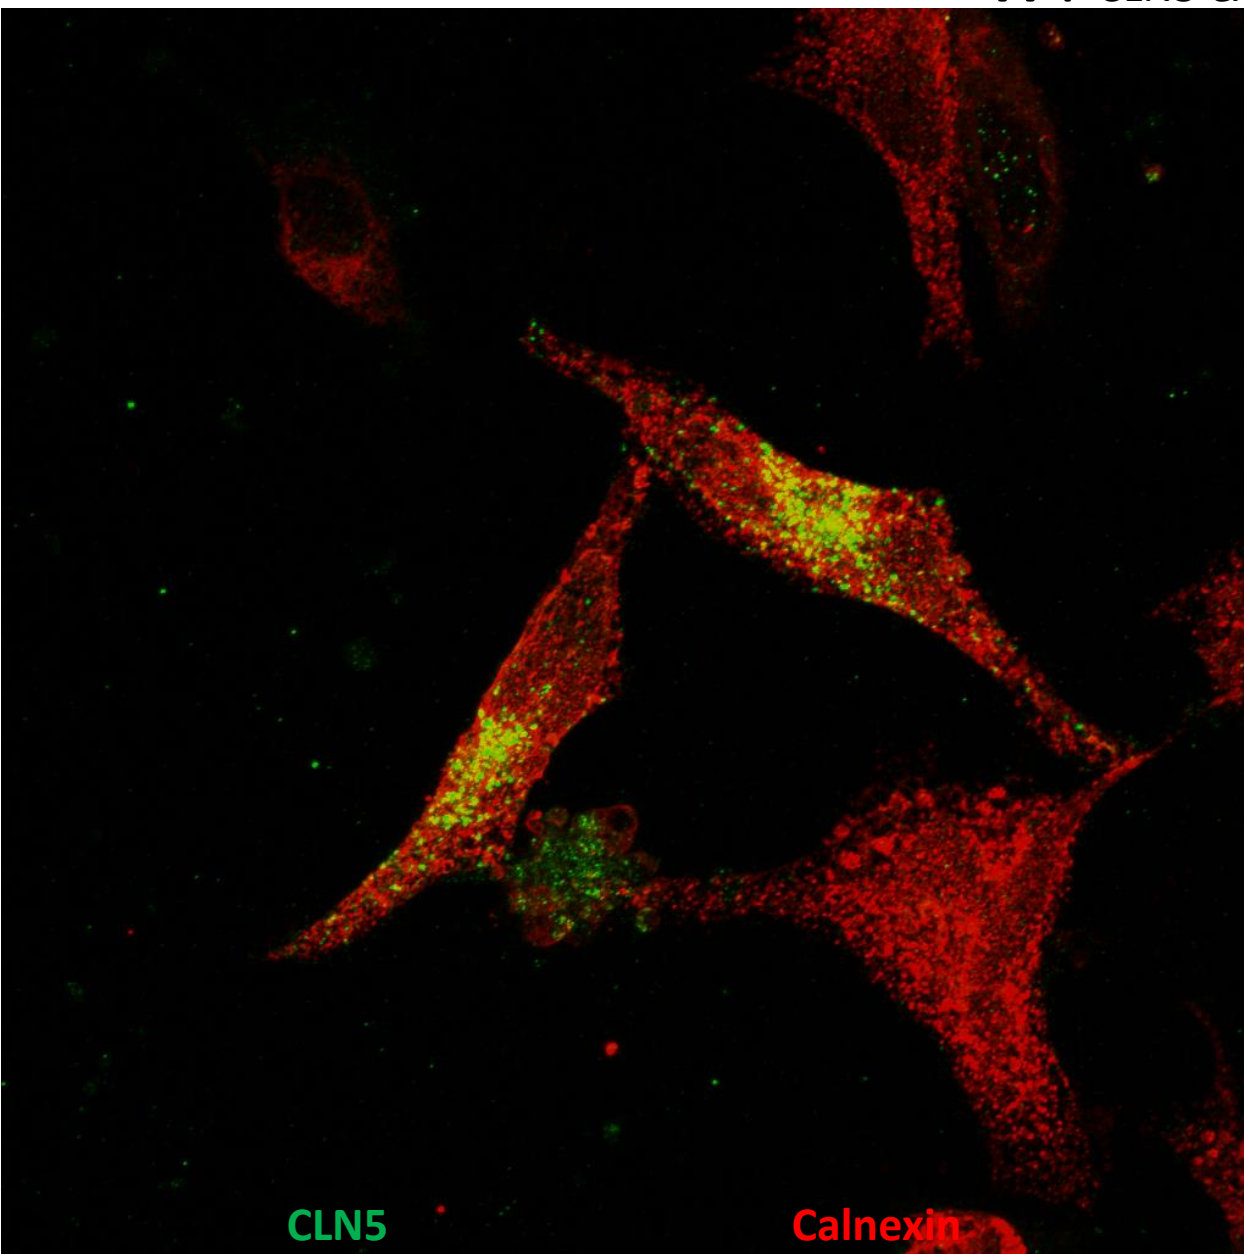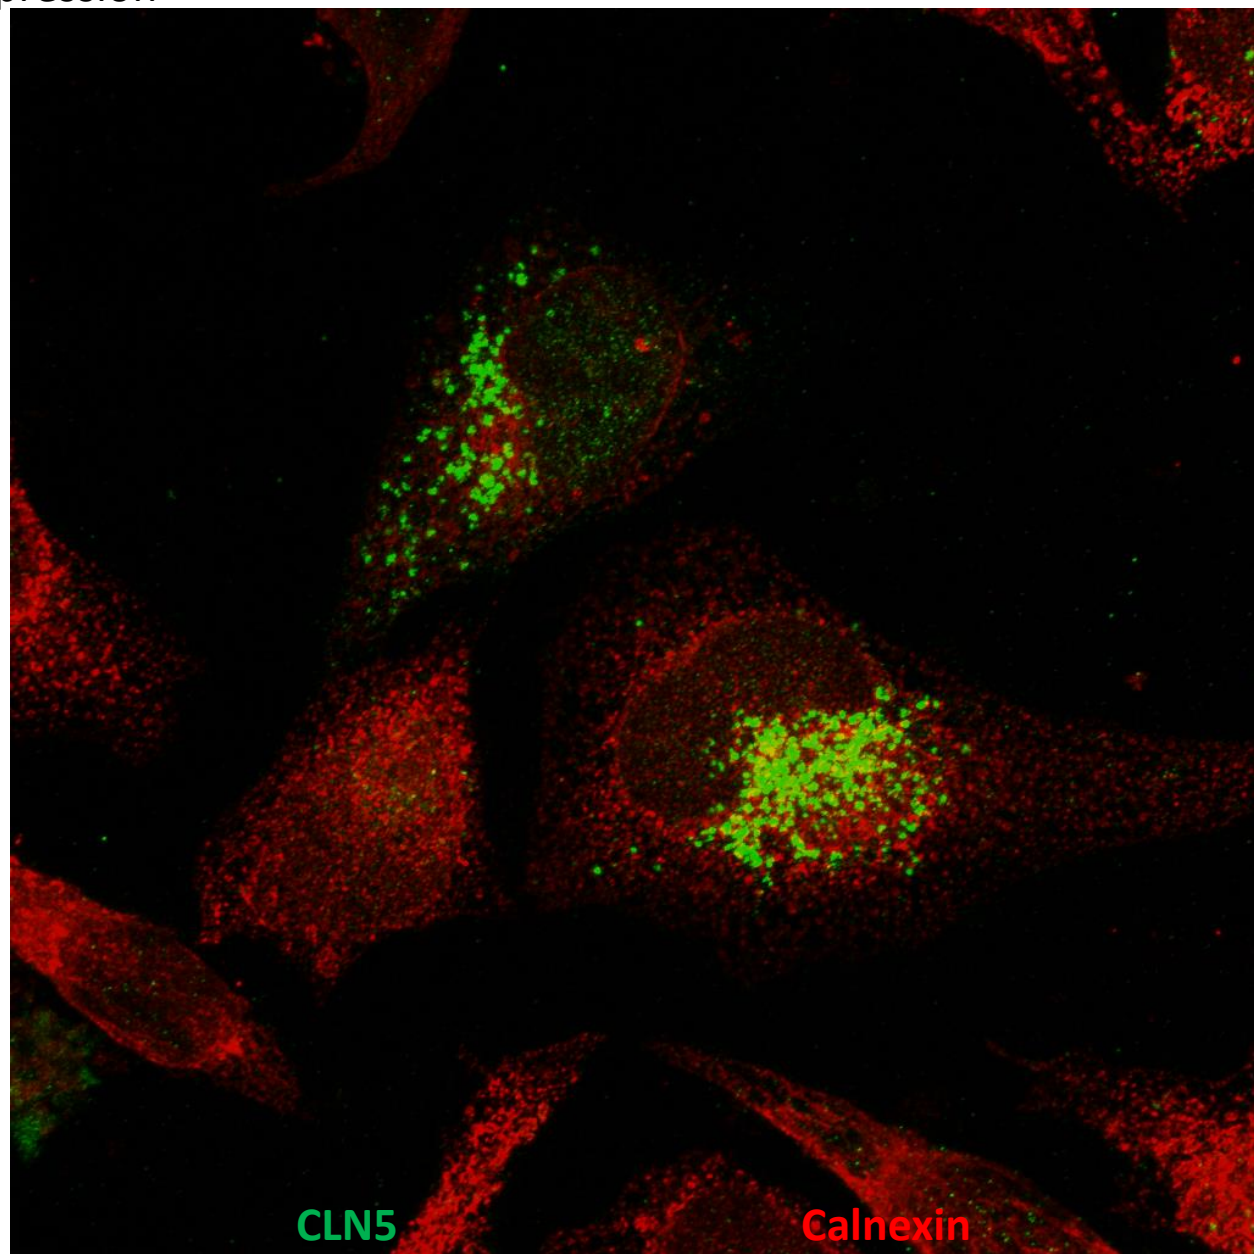

WT CLN5 expression

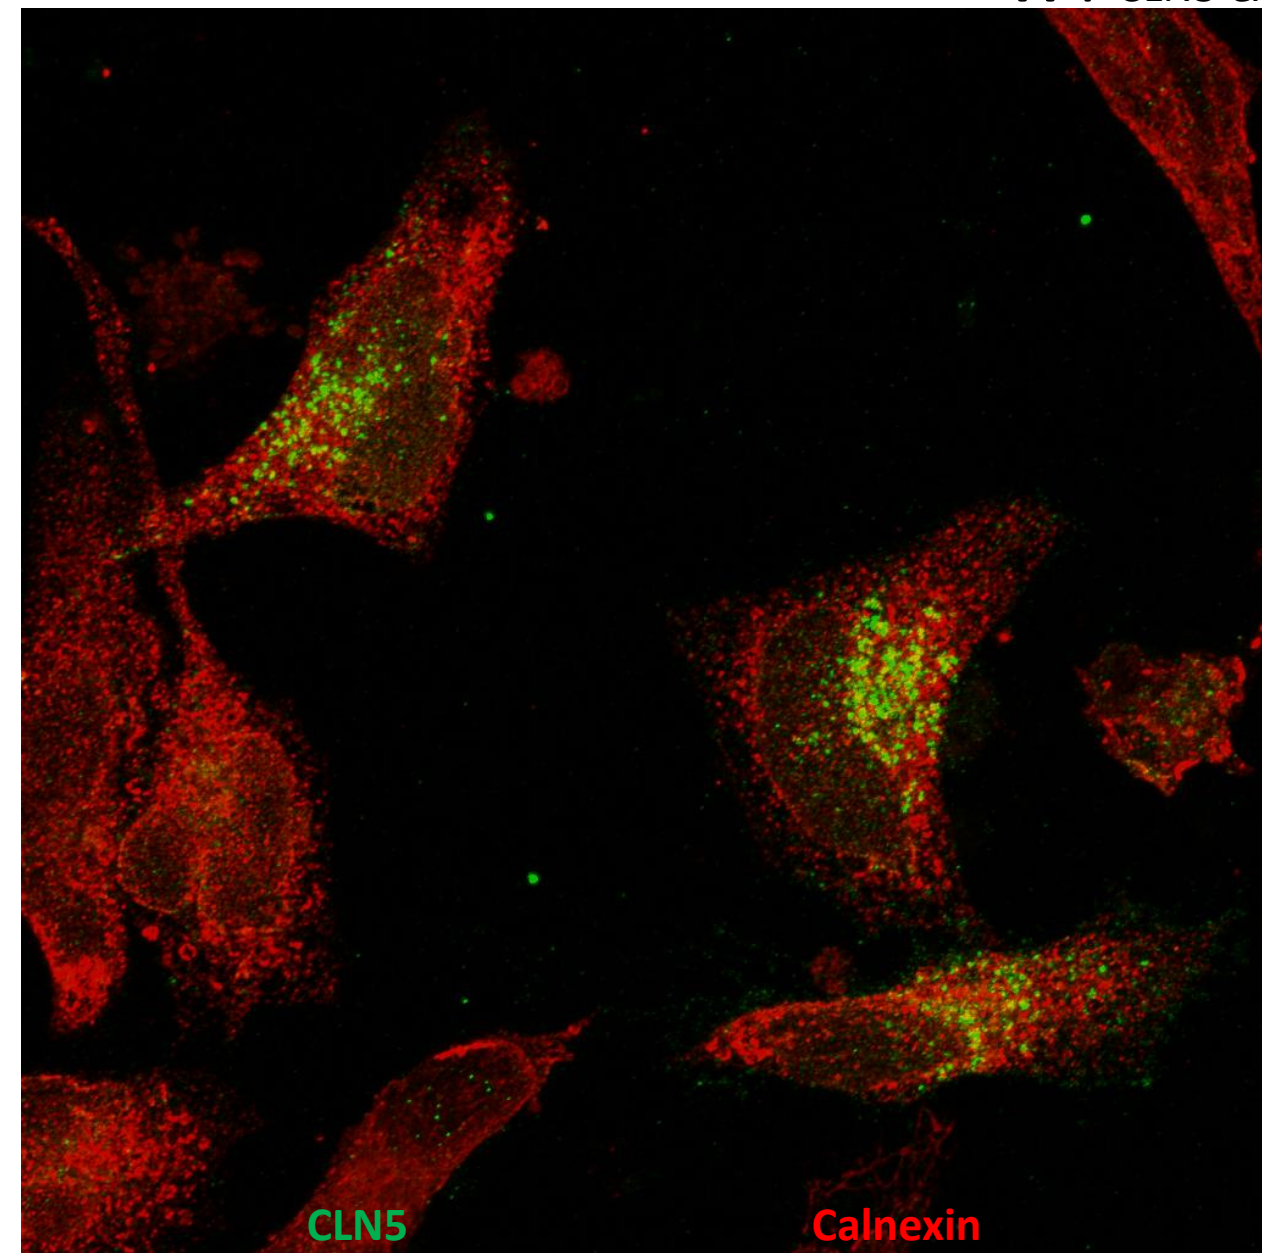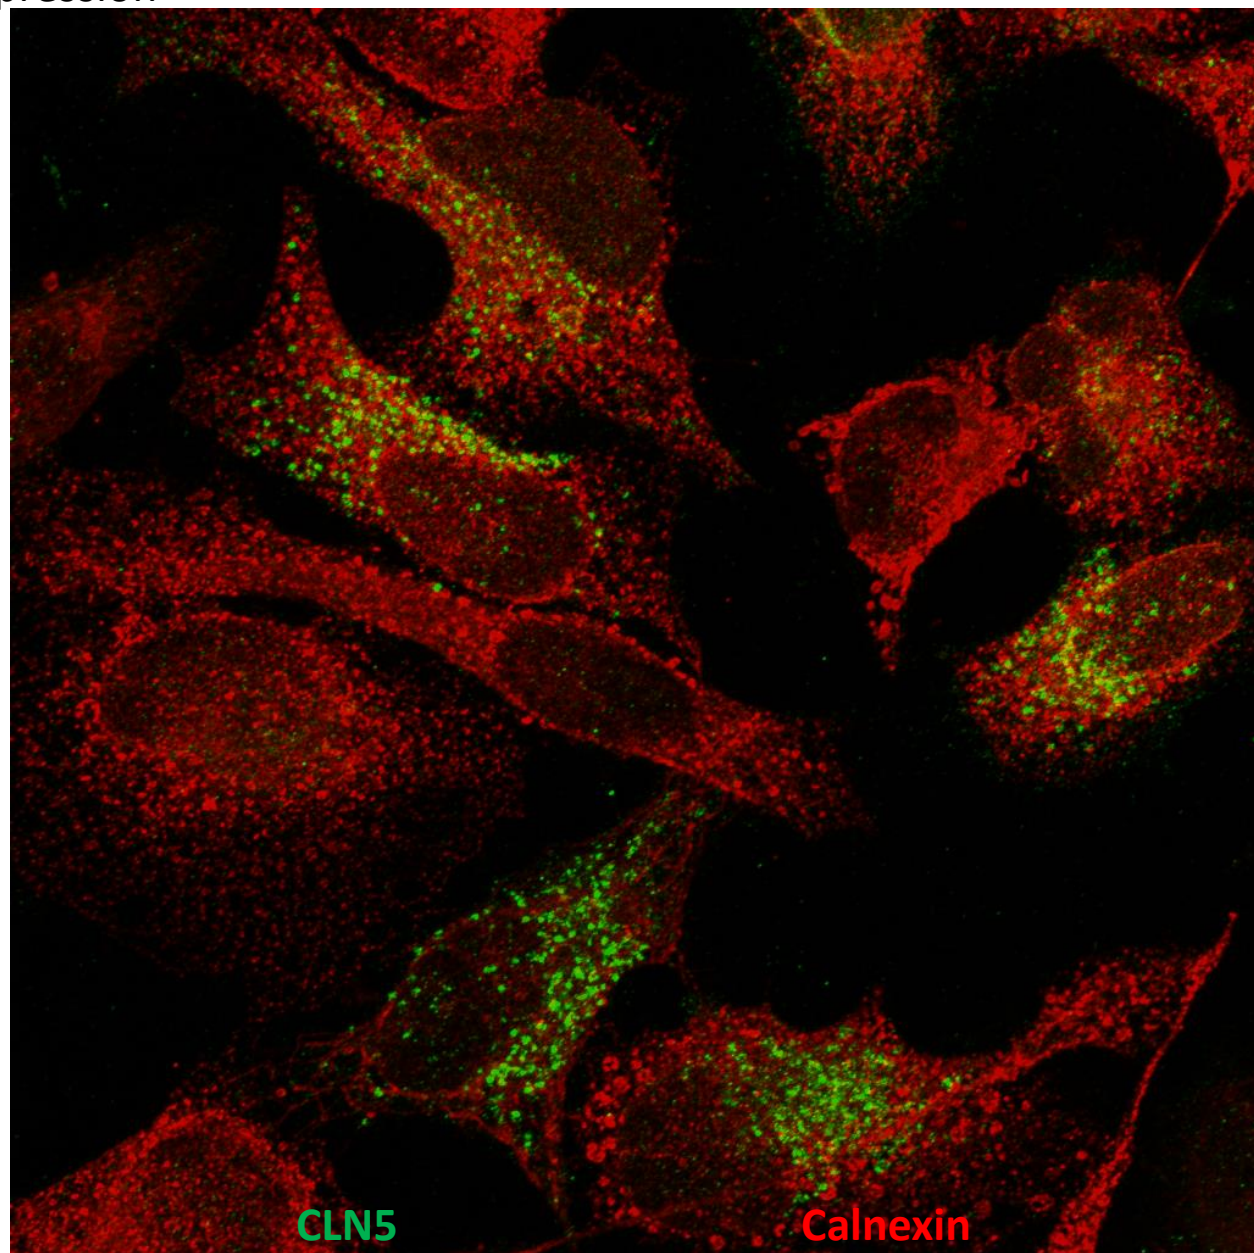

WT CLN5 expression

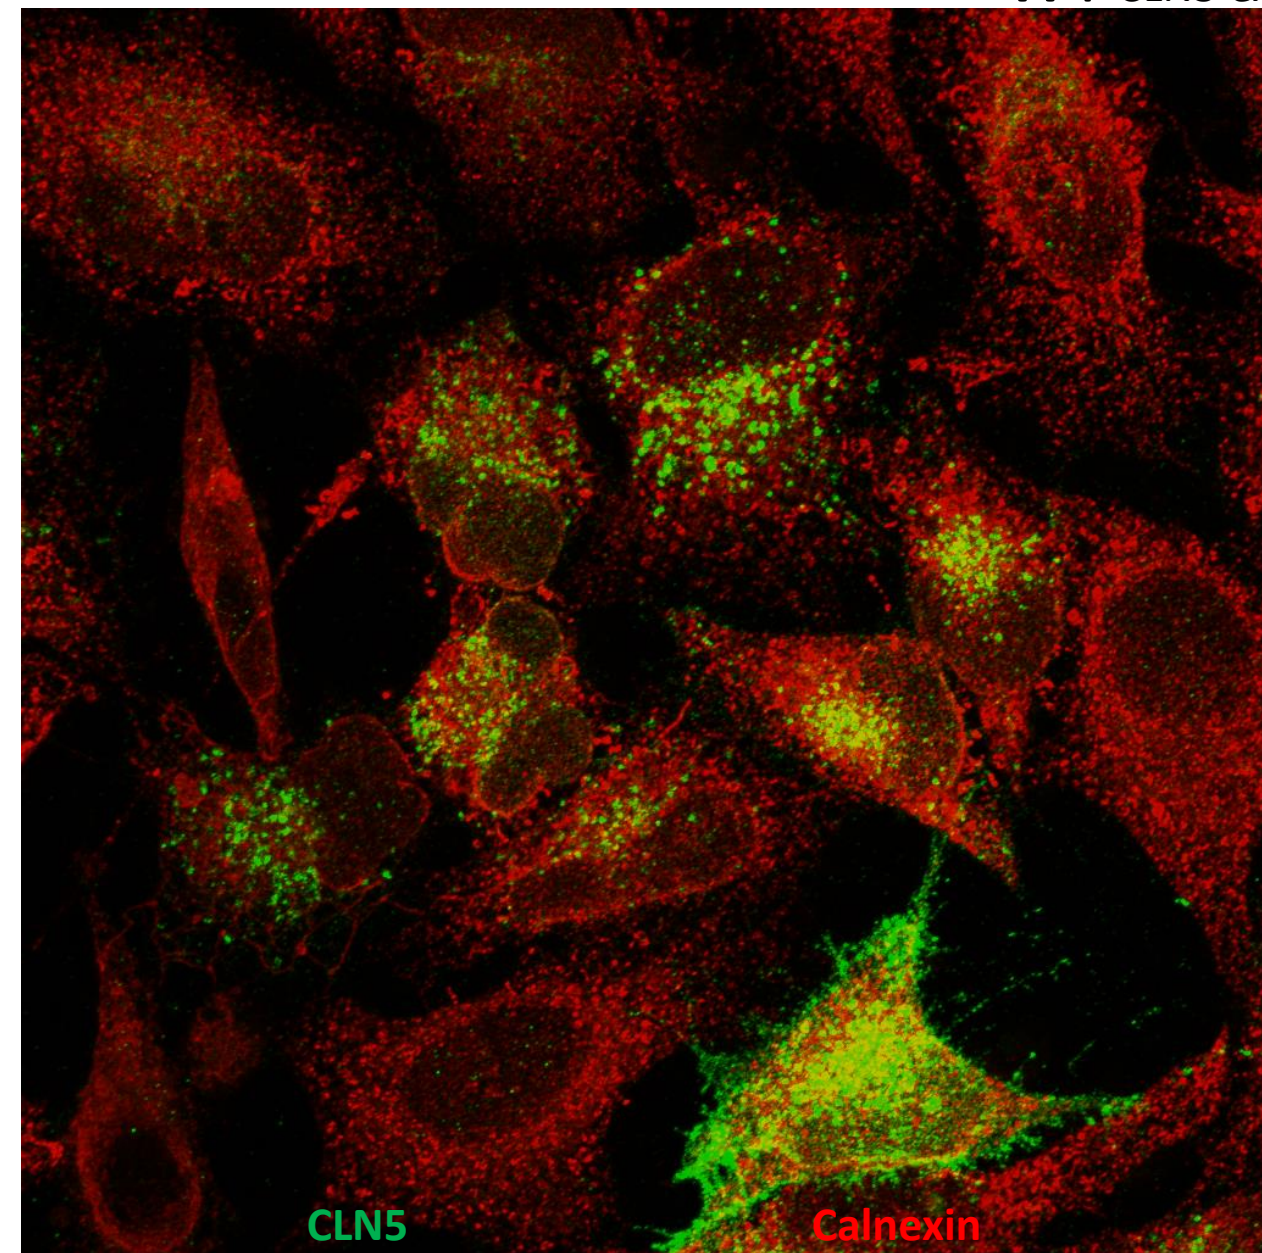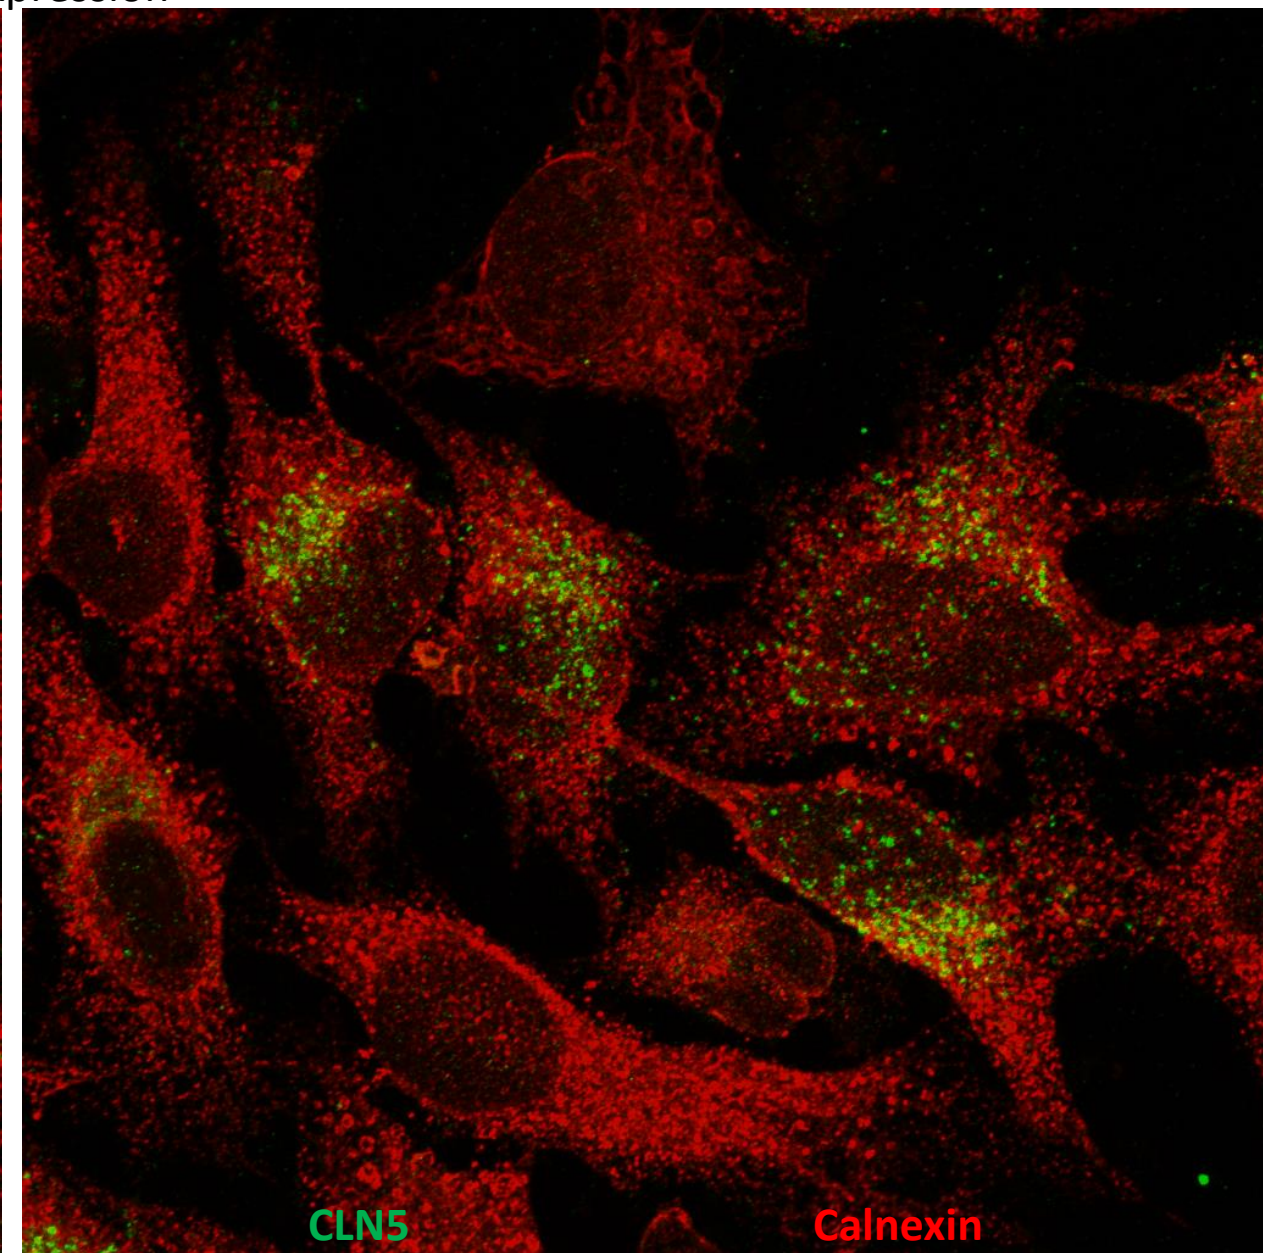



WT CLN5 expression

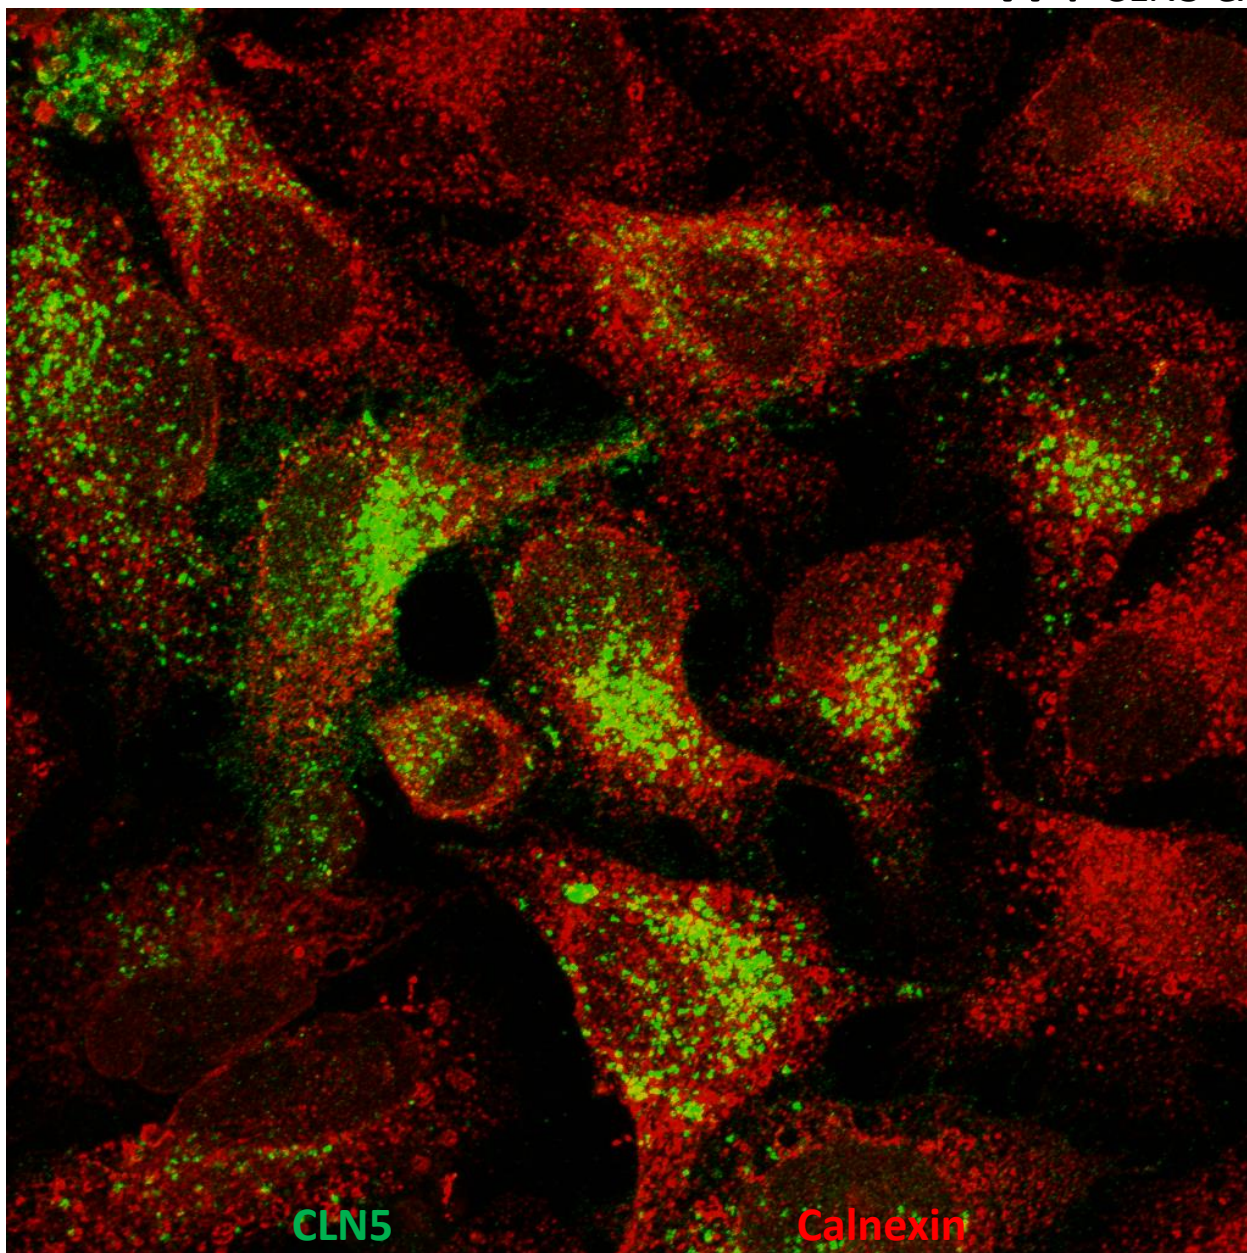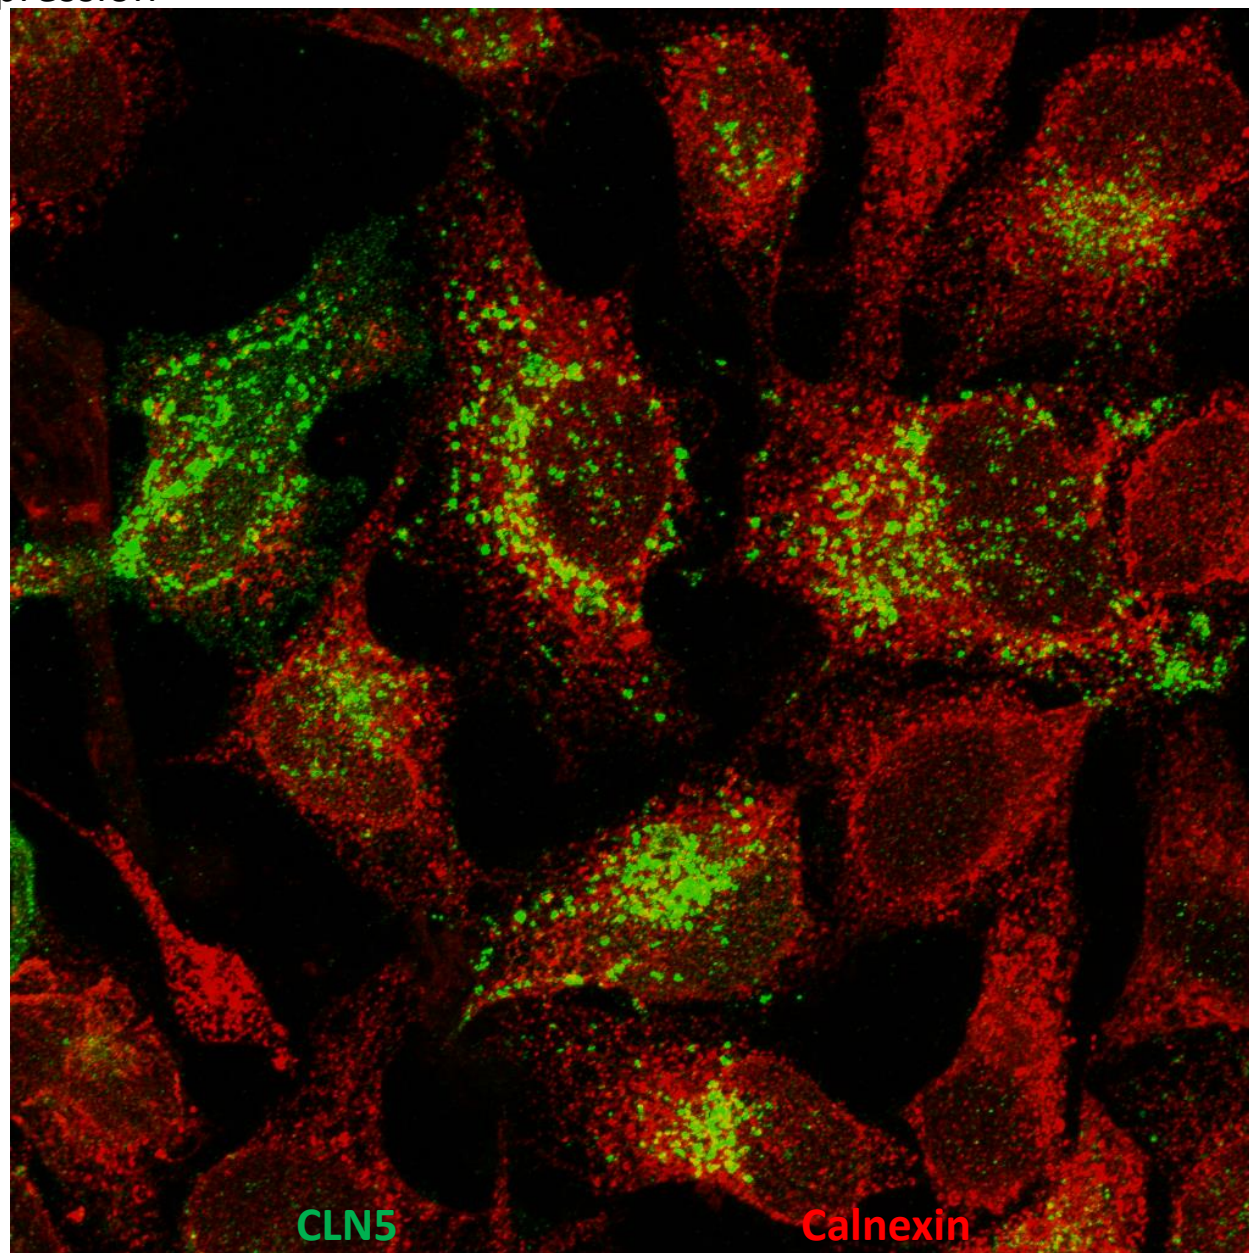

WT CLN5 expression

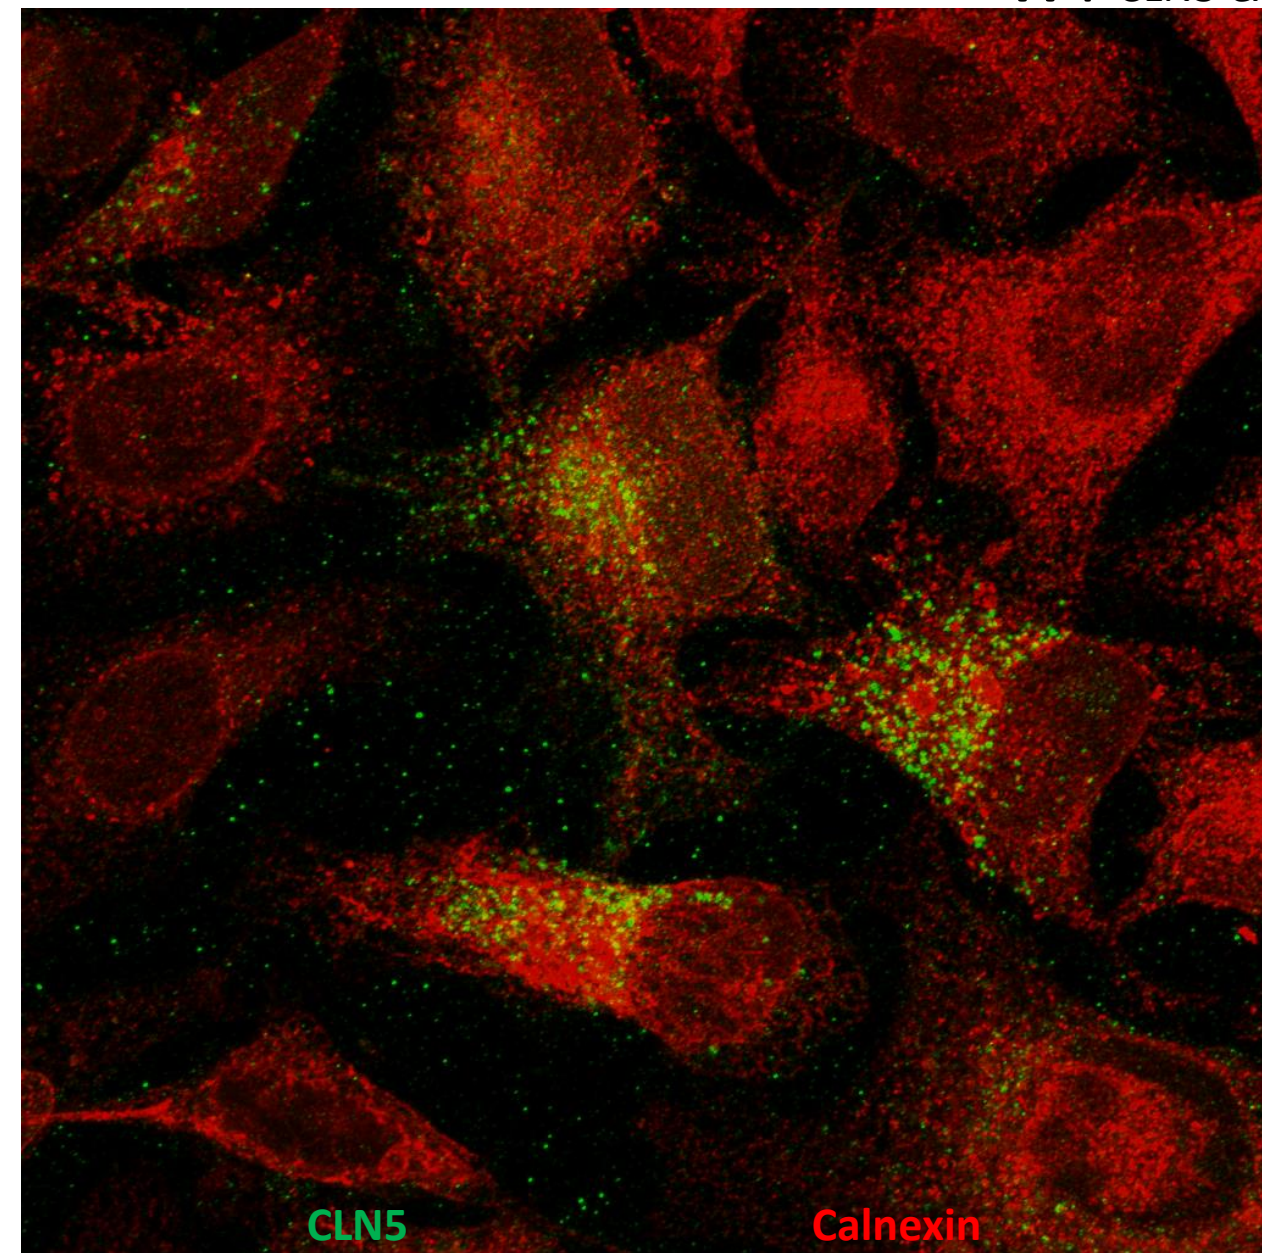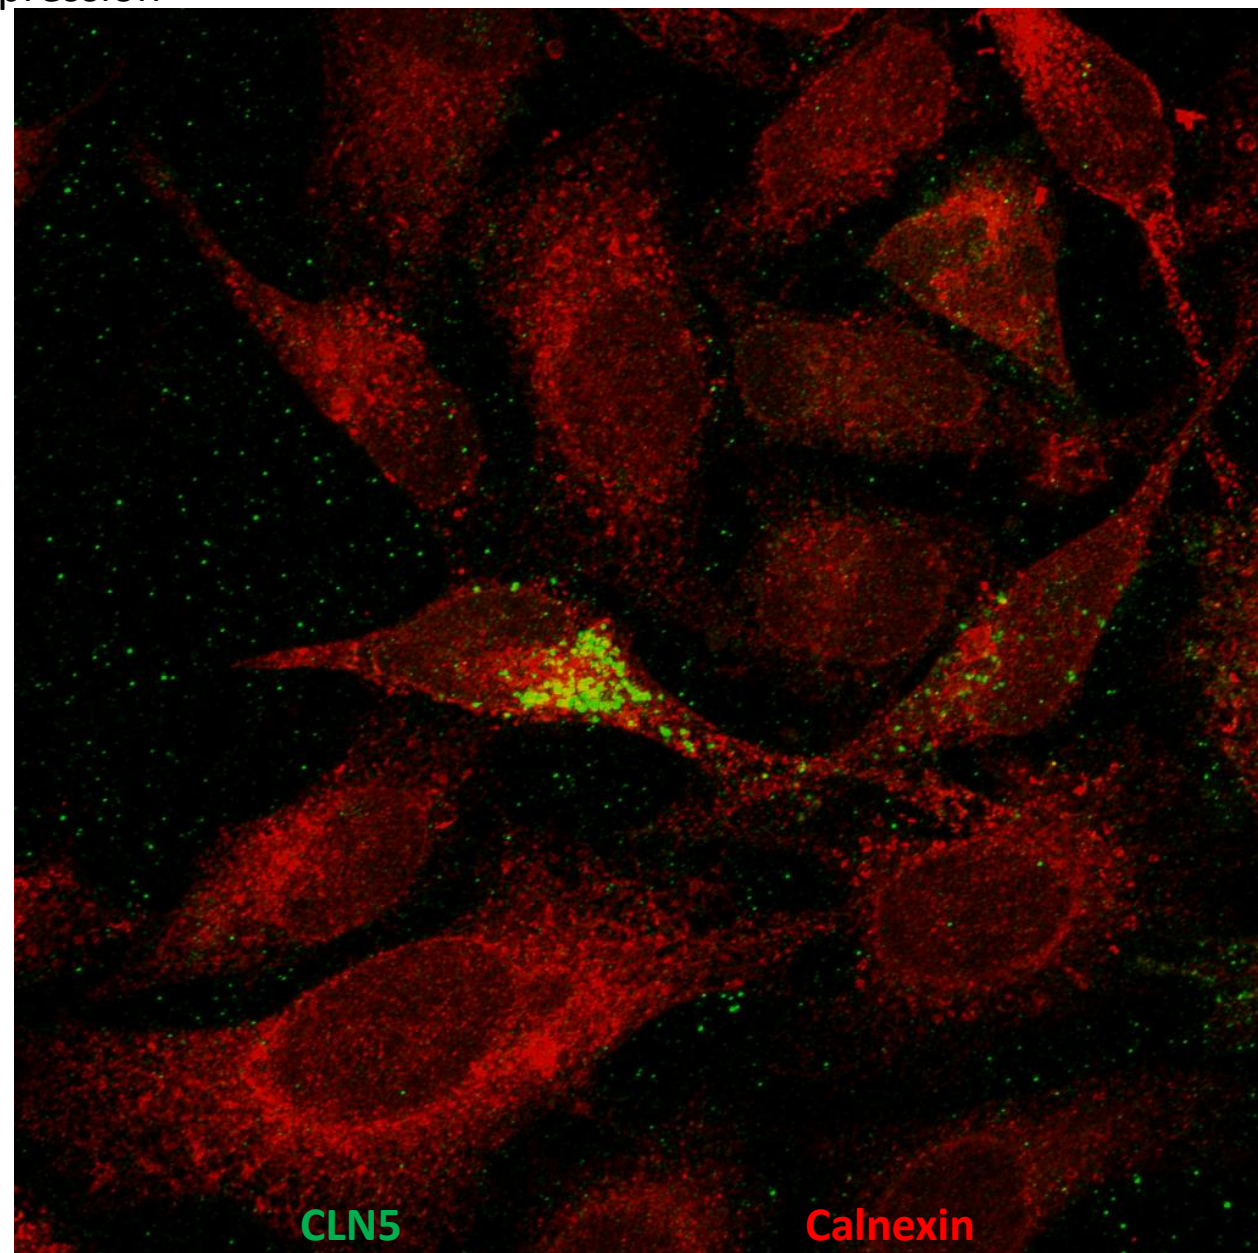

WT CLN5 expression

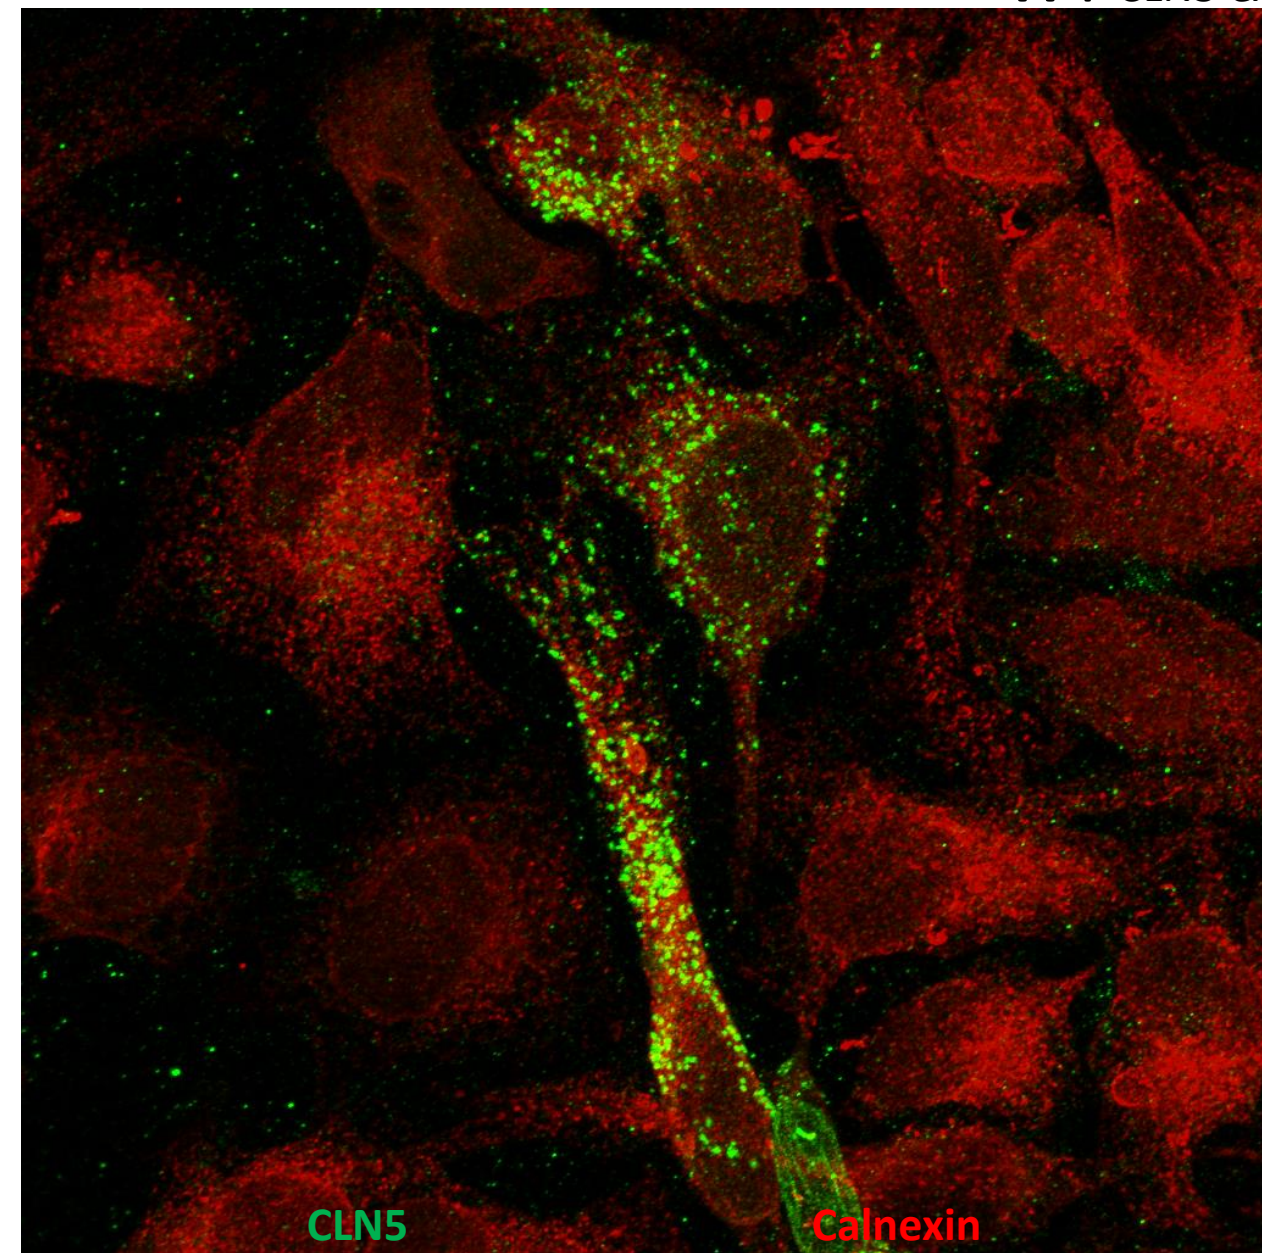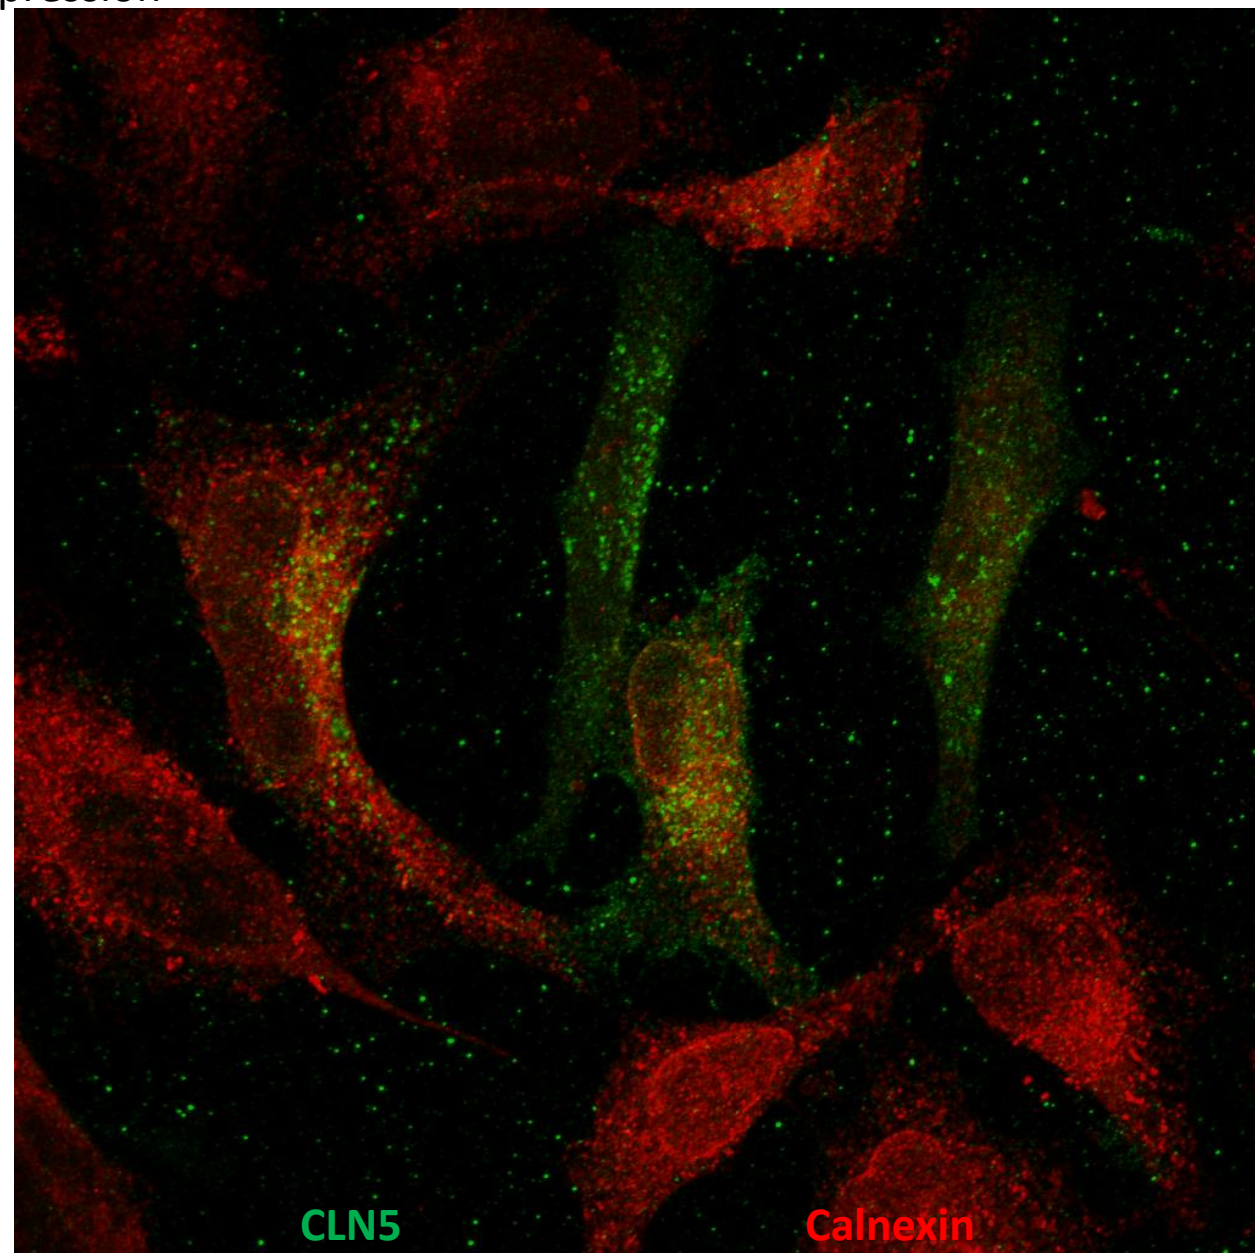

WT CLN5 expression

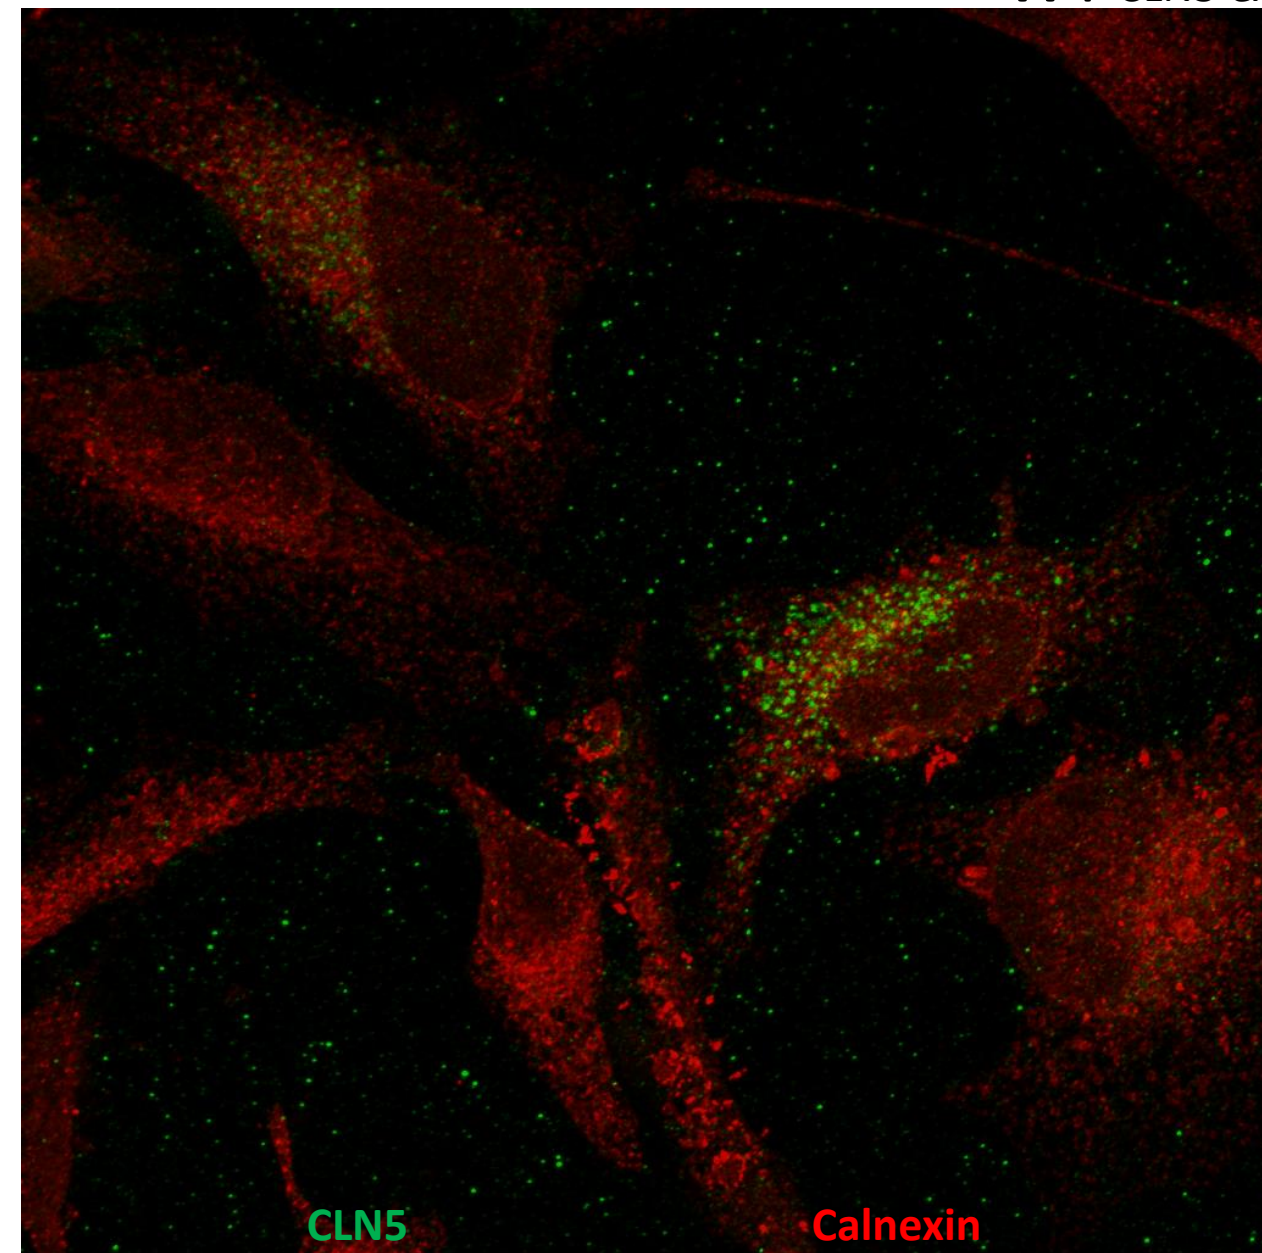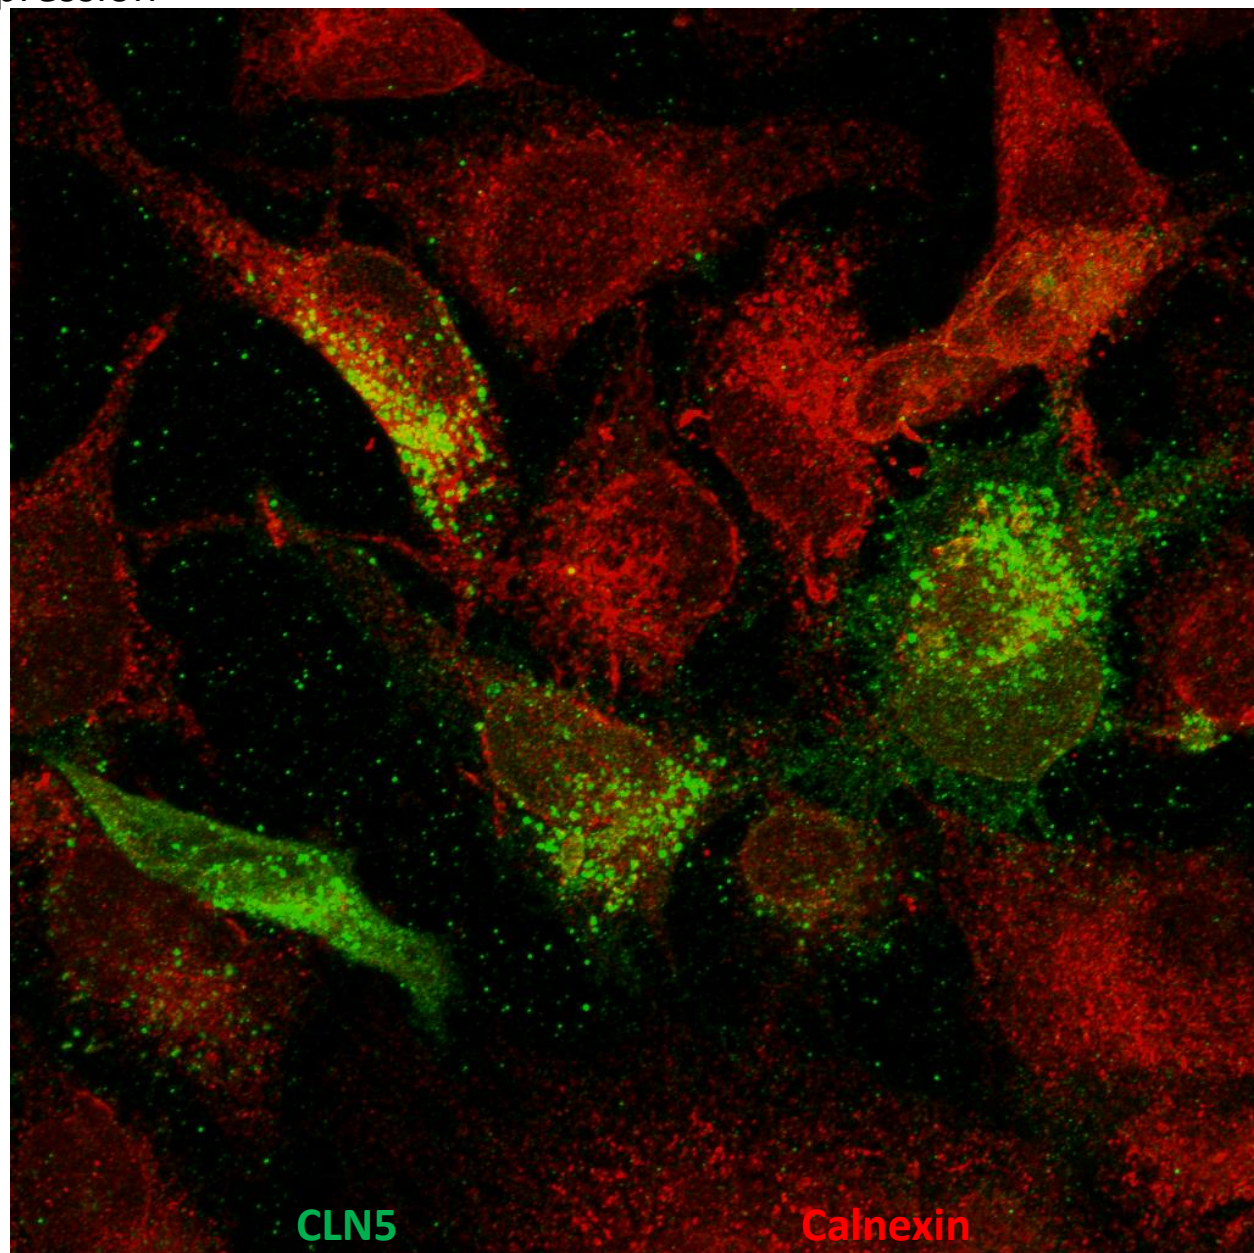

WT CLN5 expression

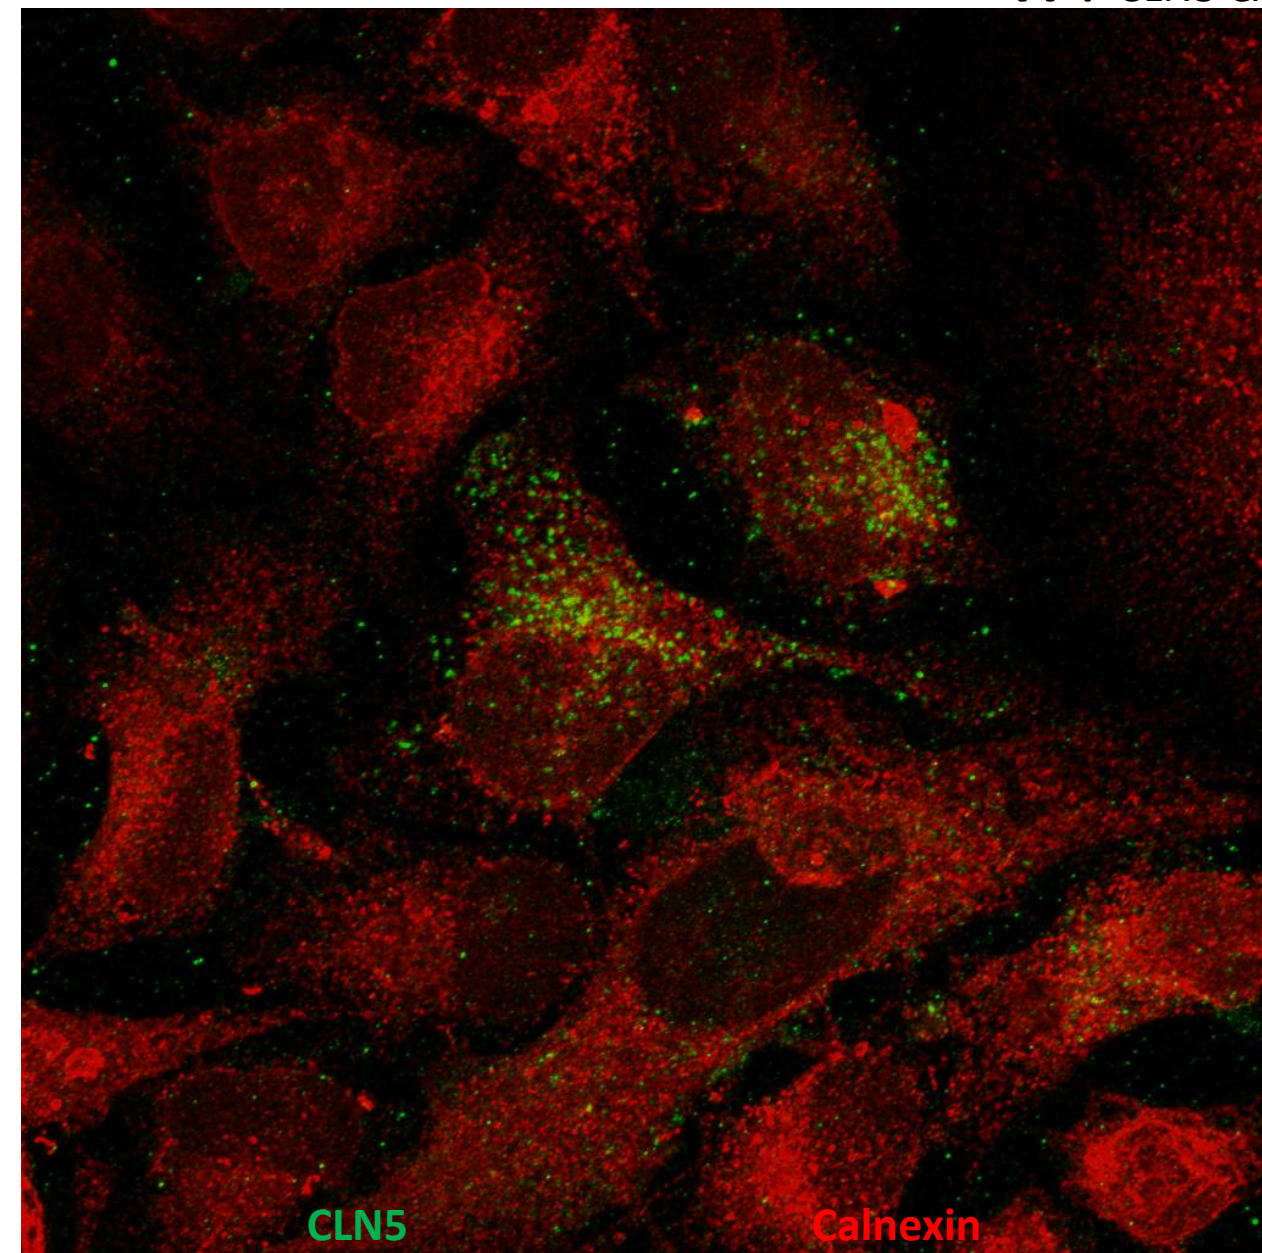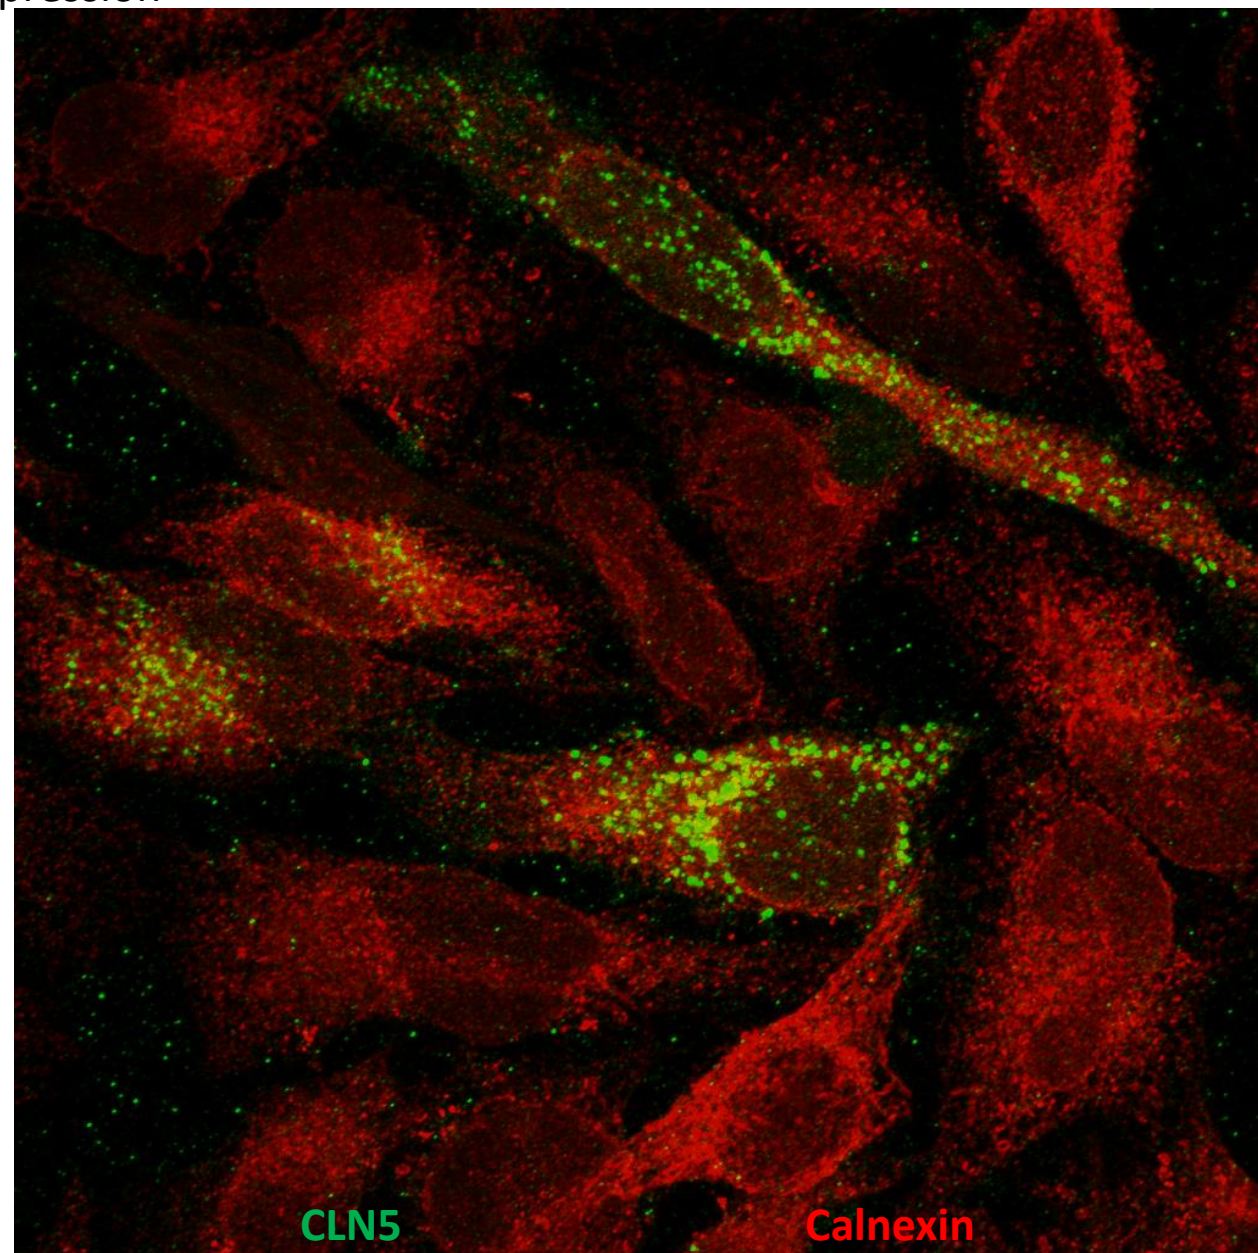

WT CLN5 expression

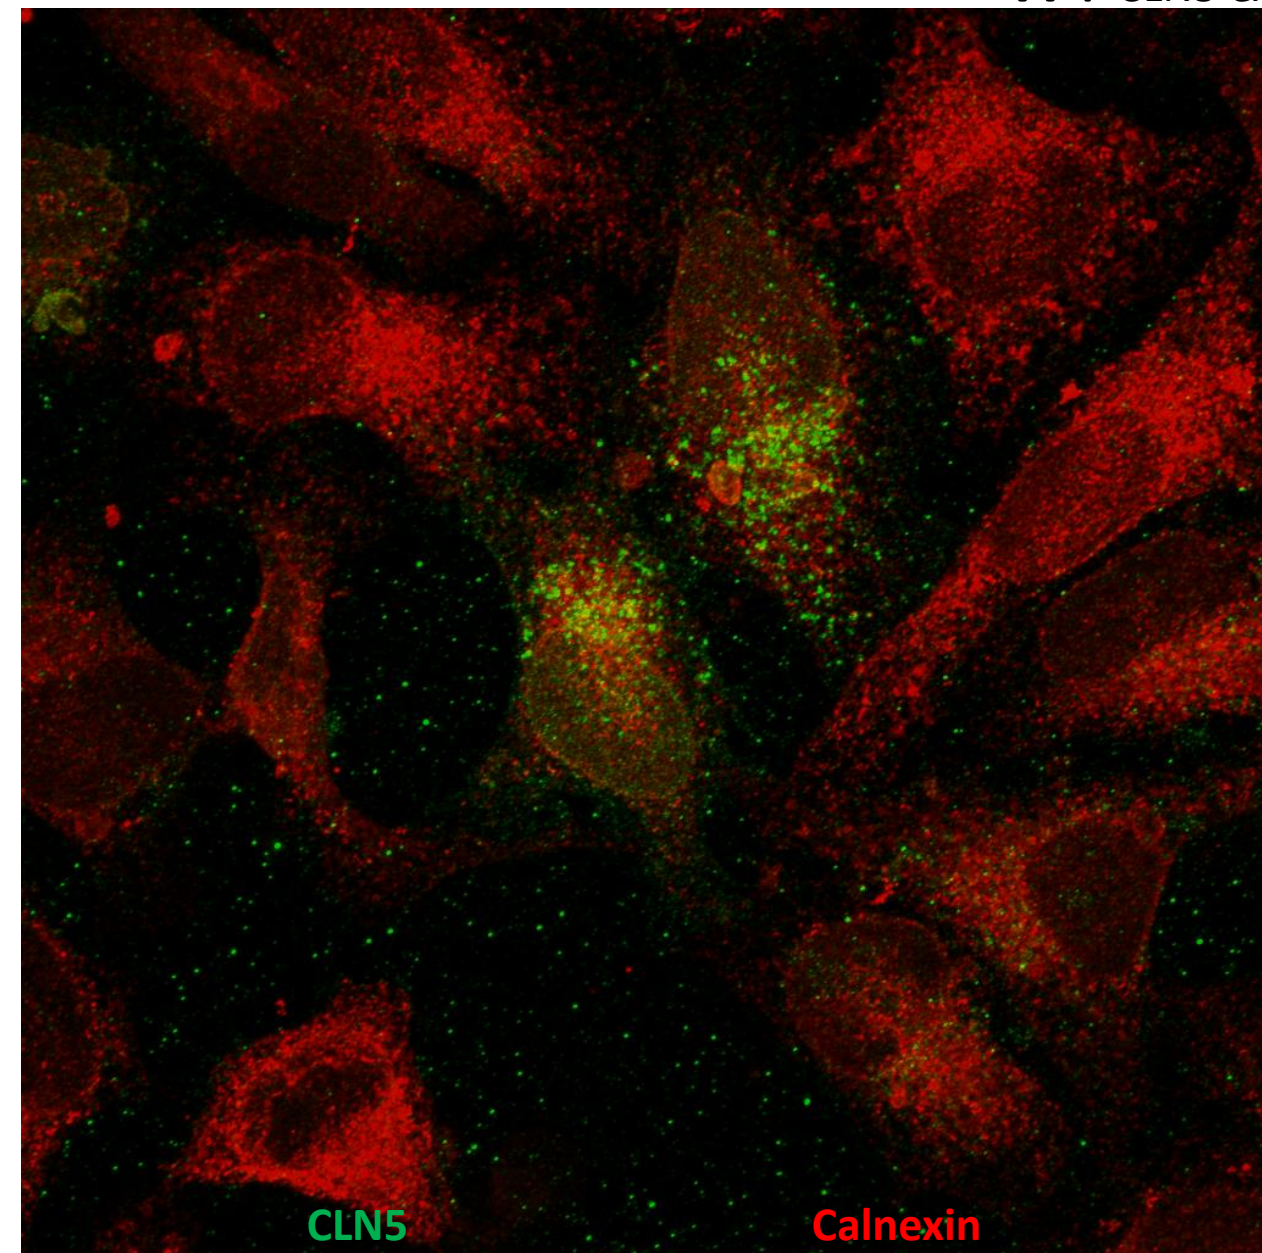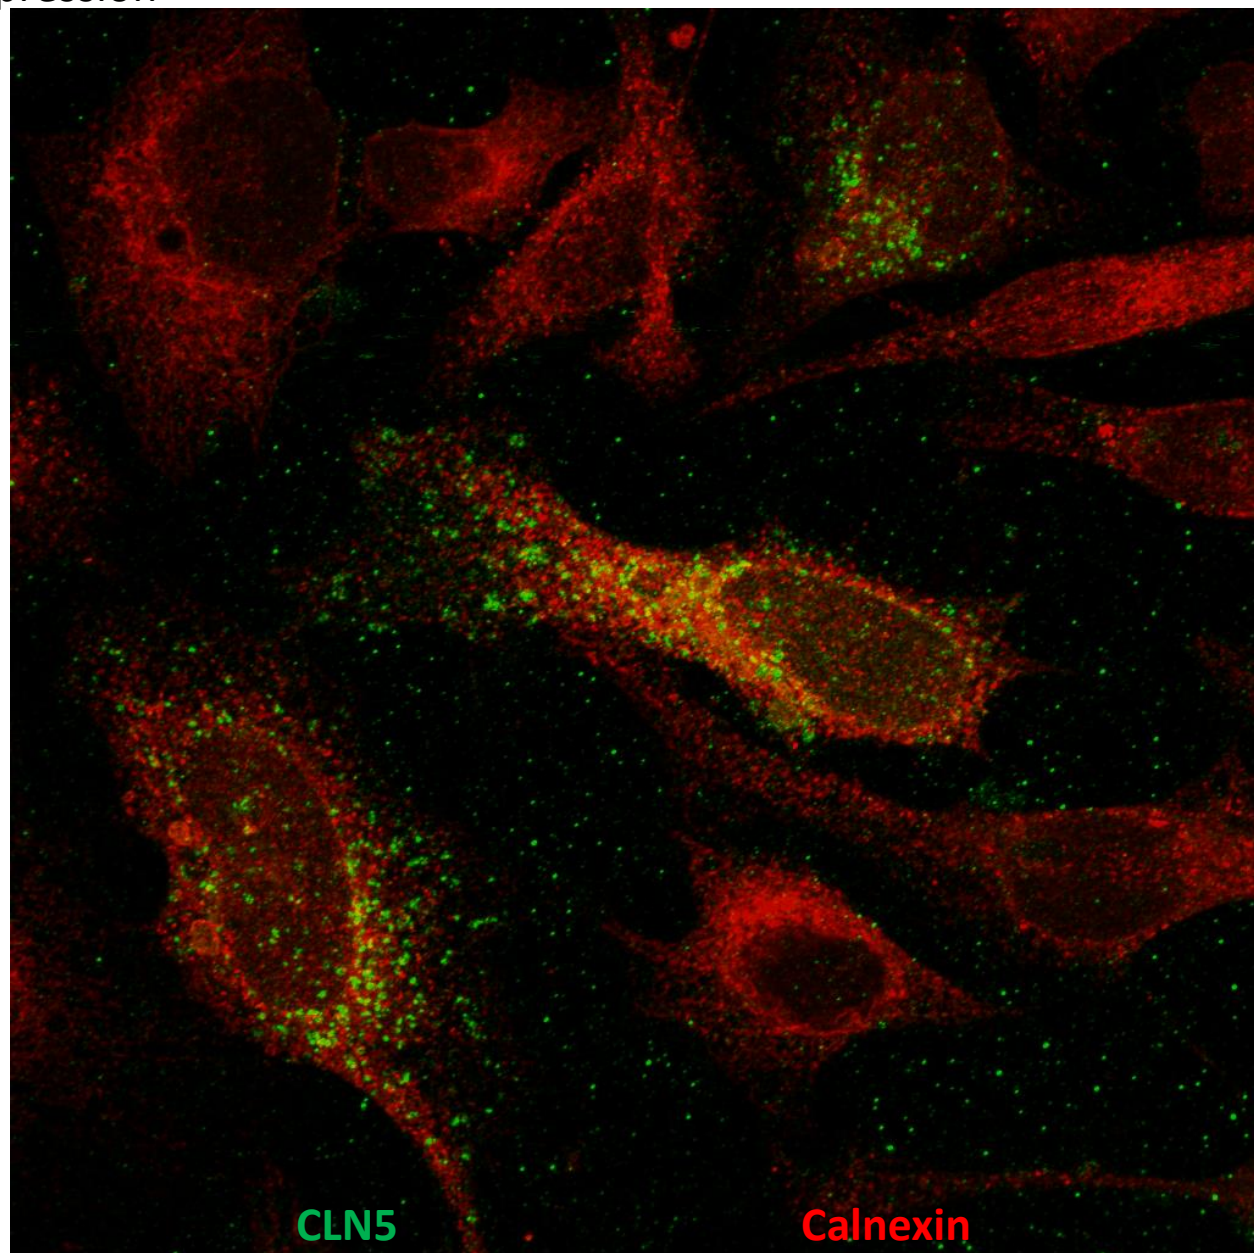

WT CLN5 expression

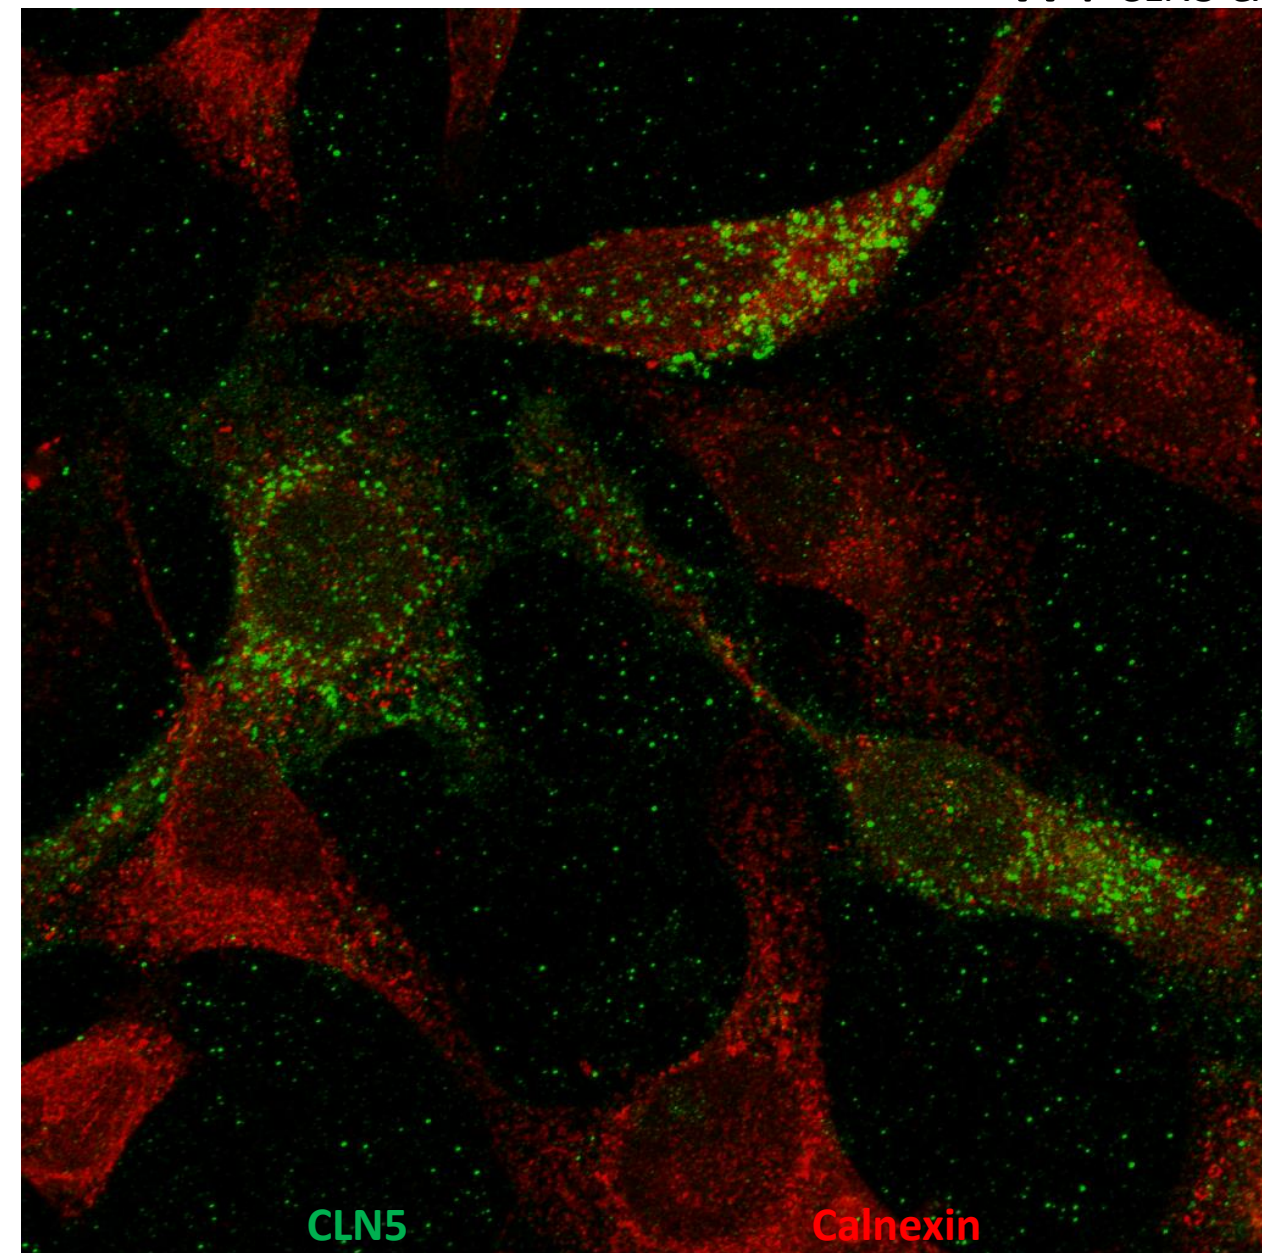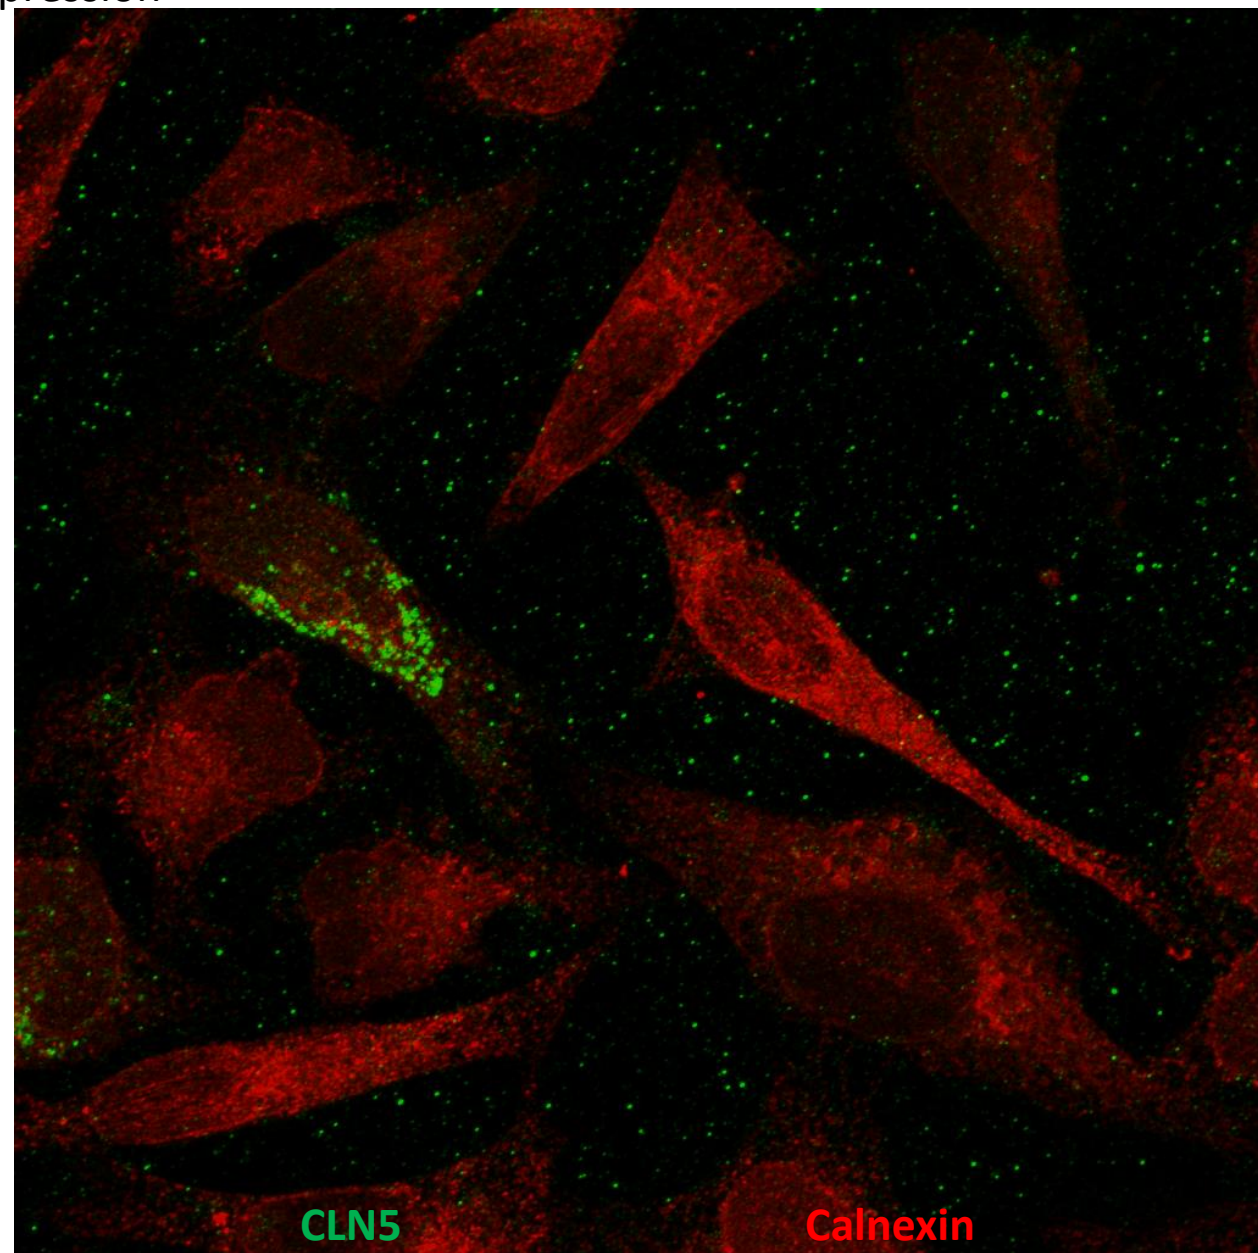

WT CLN5 expression

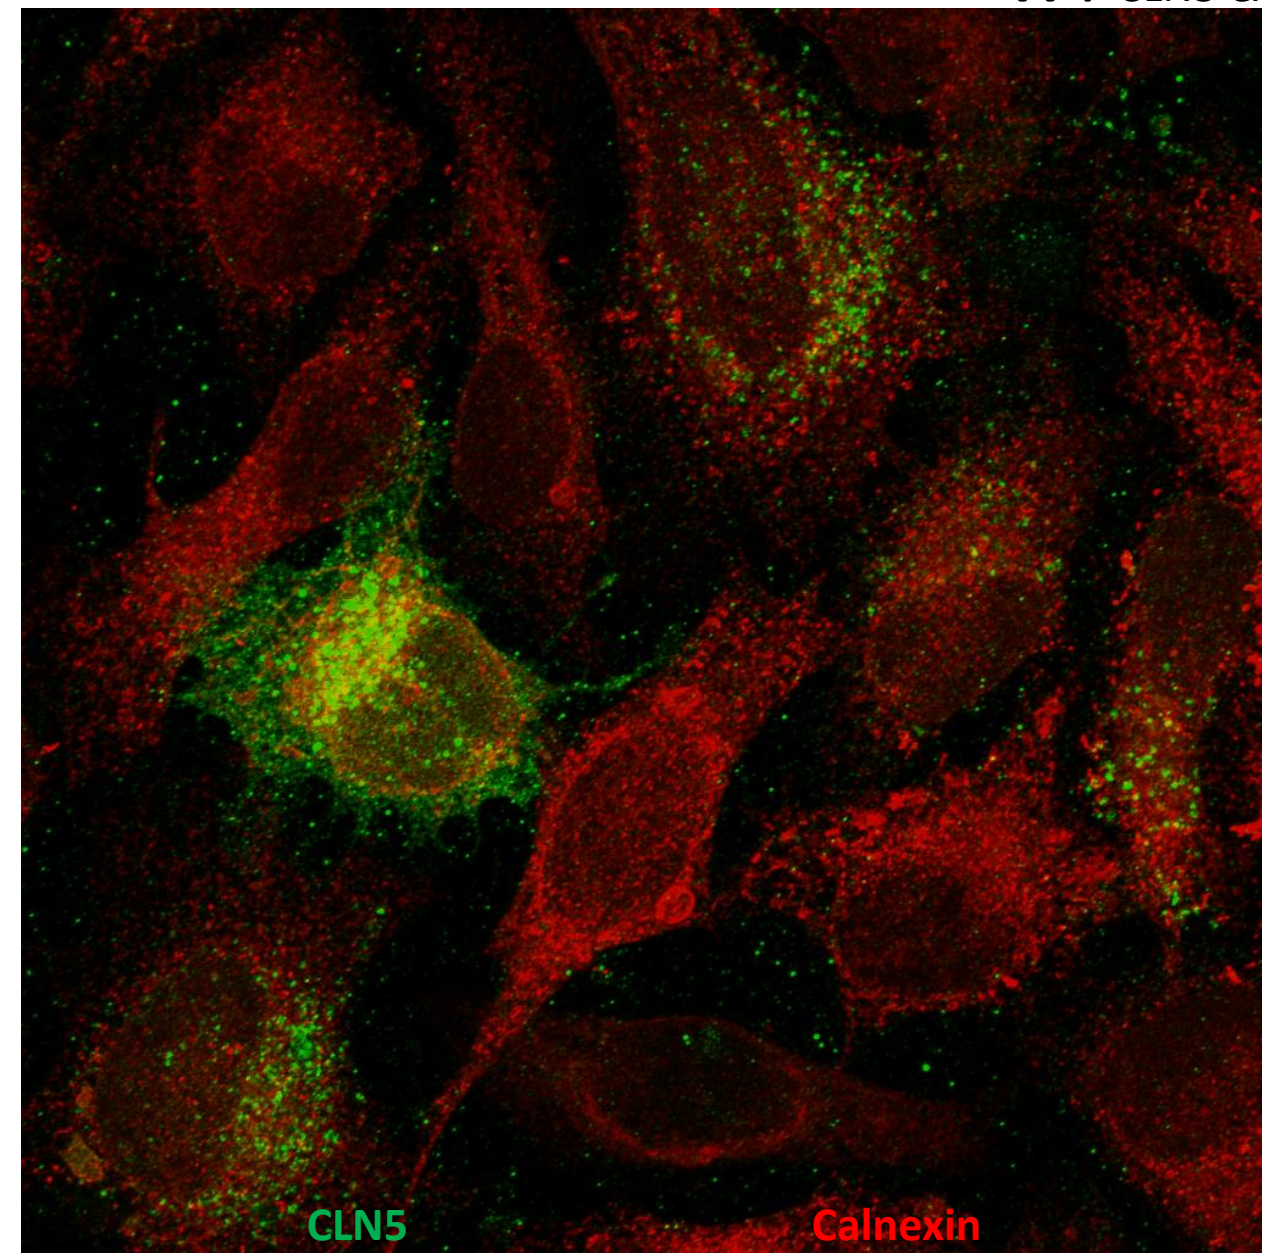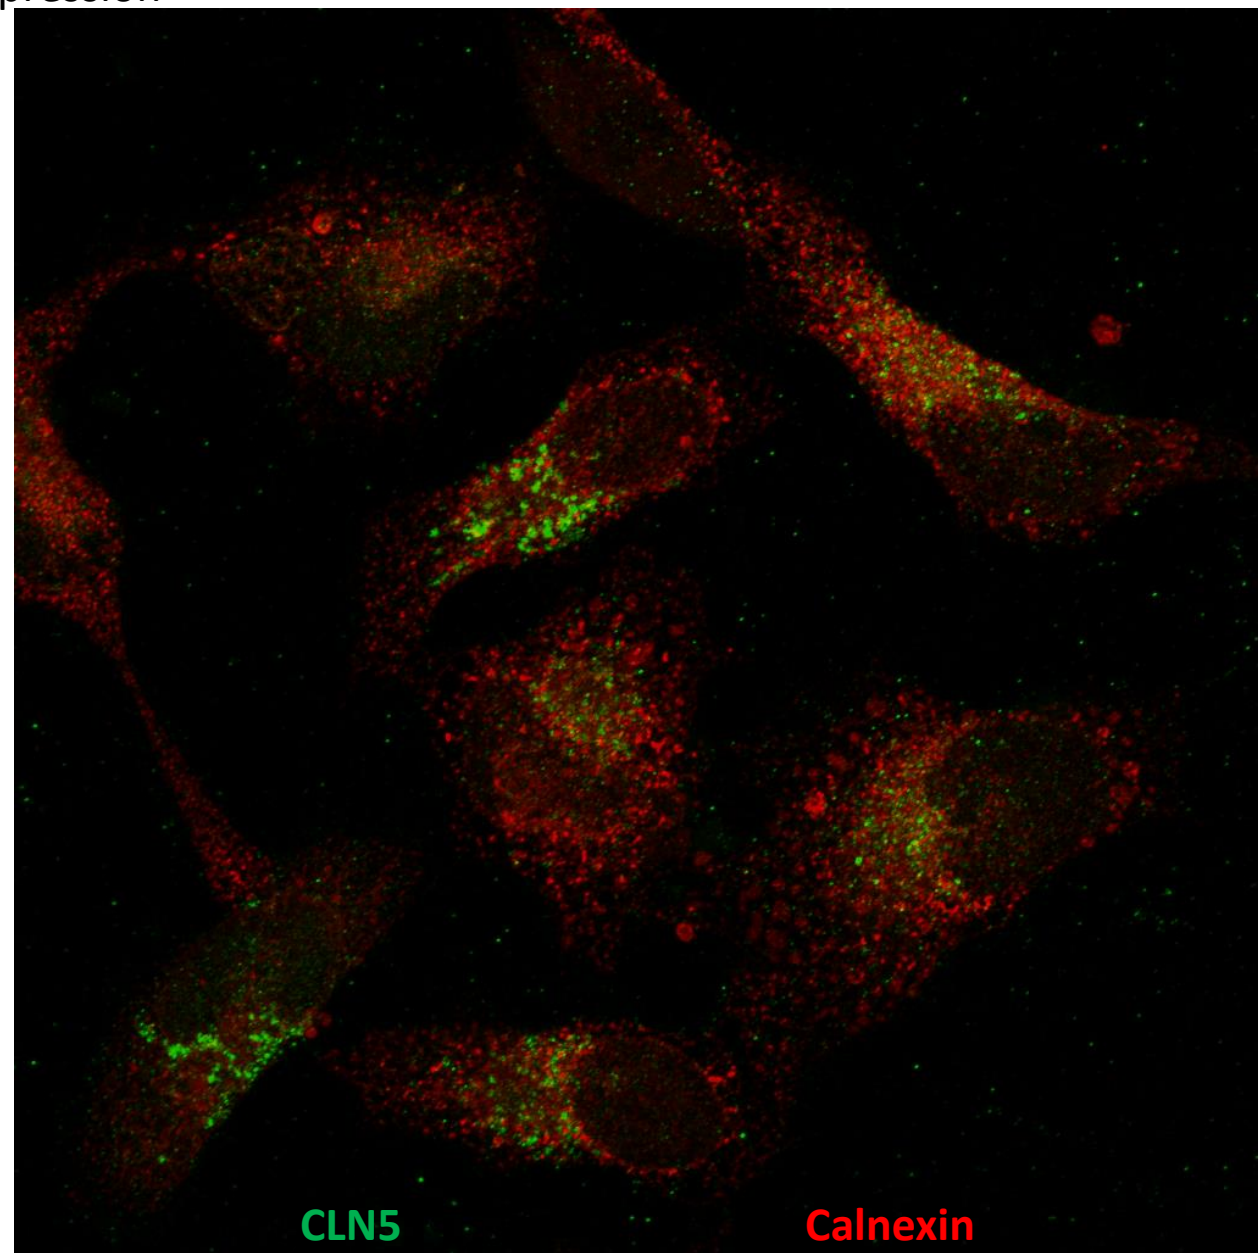



WT CLN5 expression

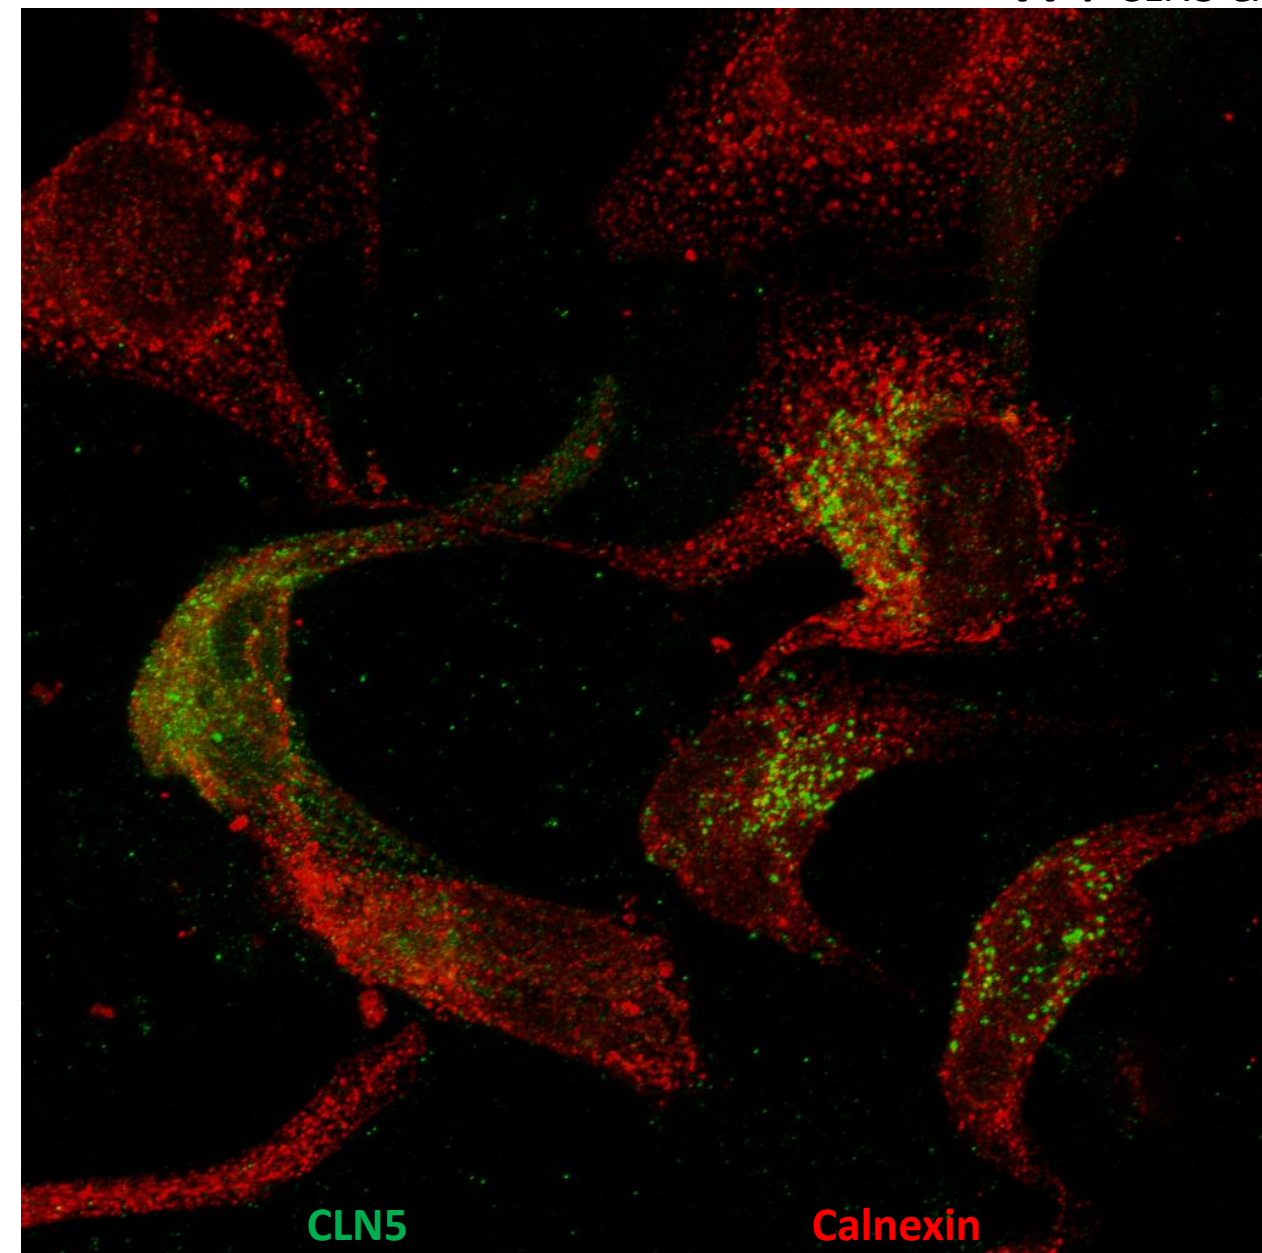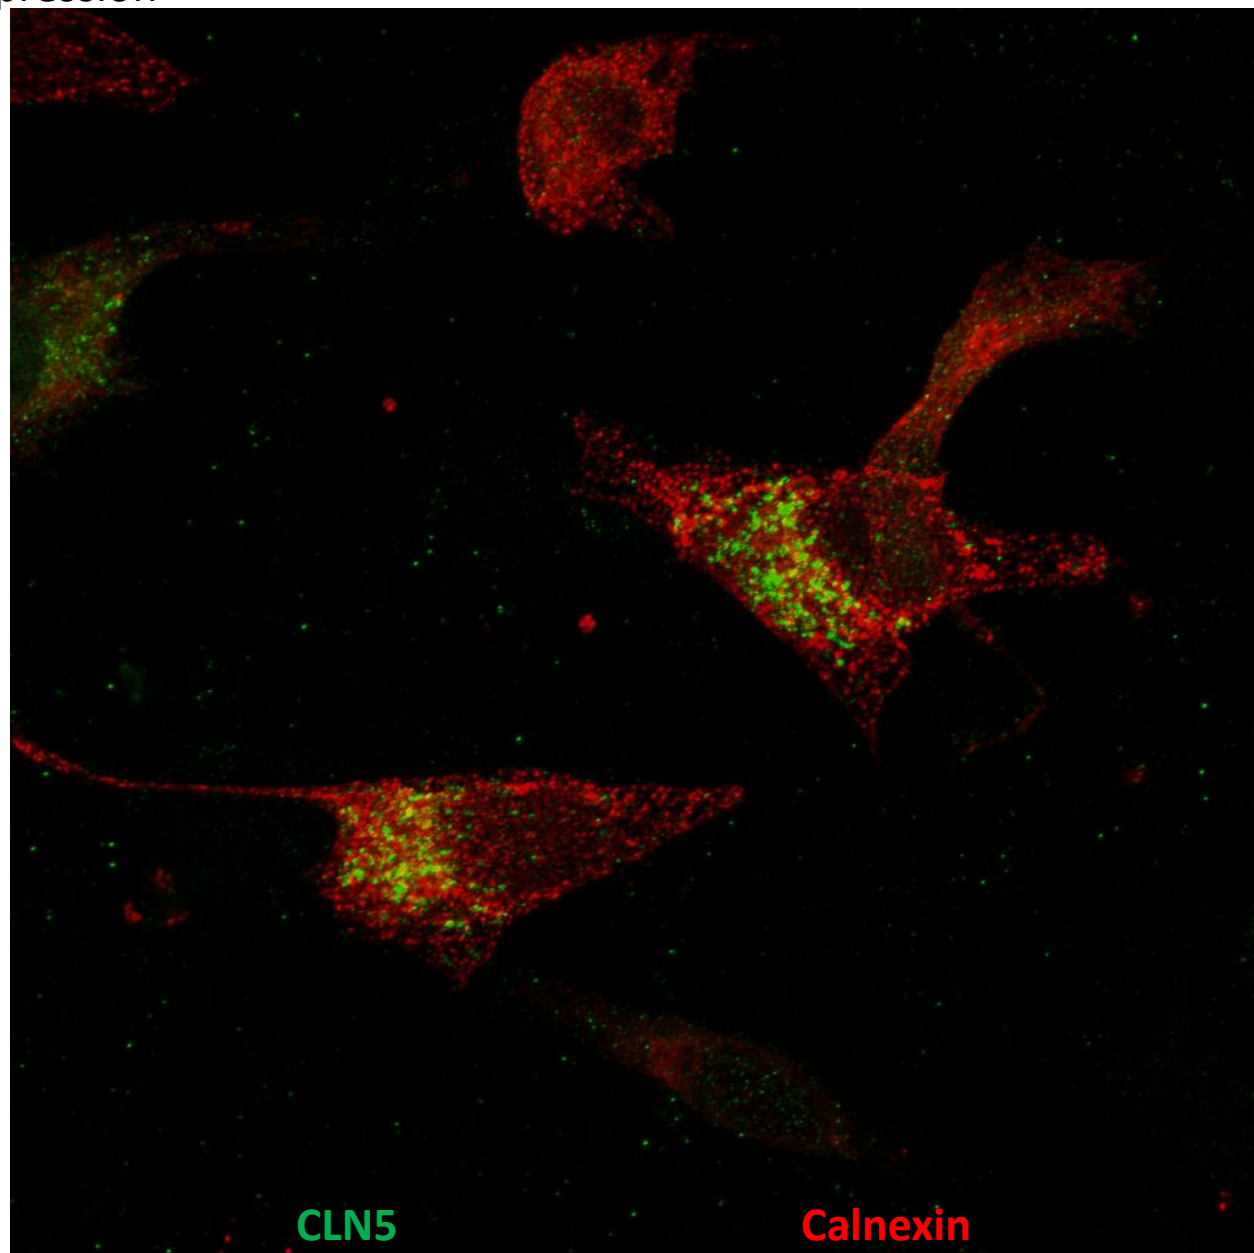

WT CLN5 expression

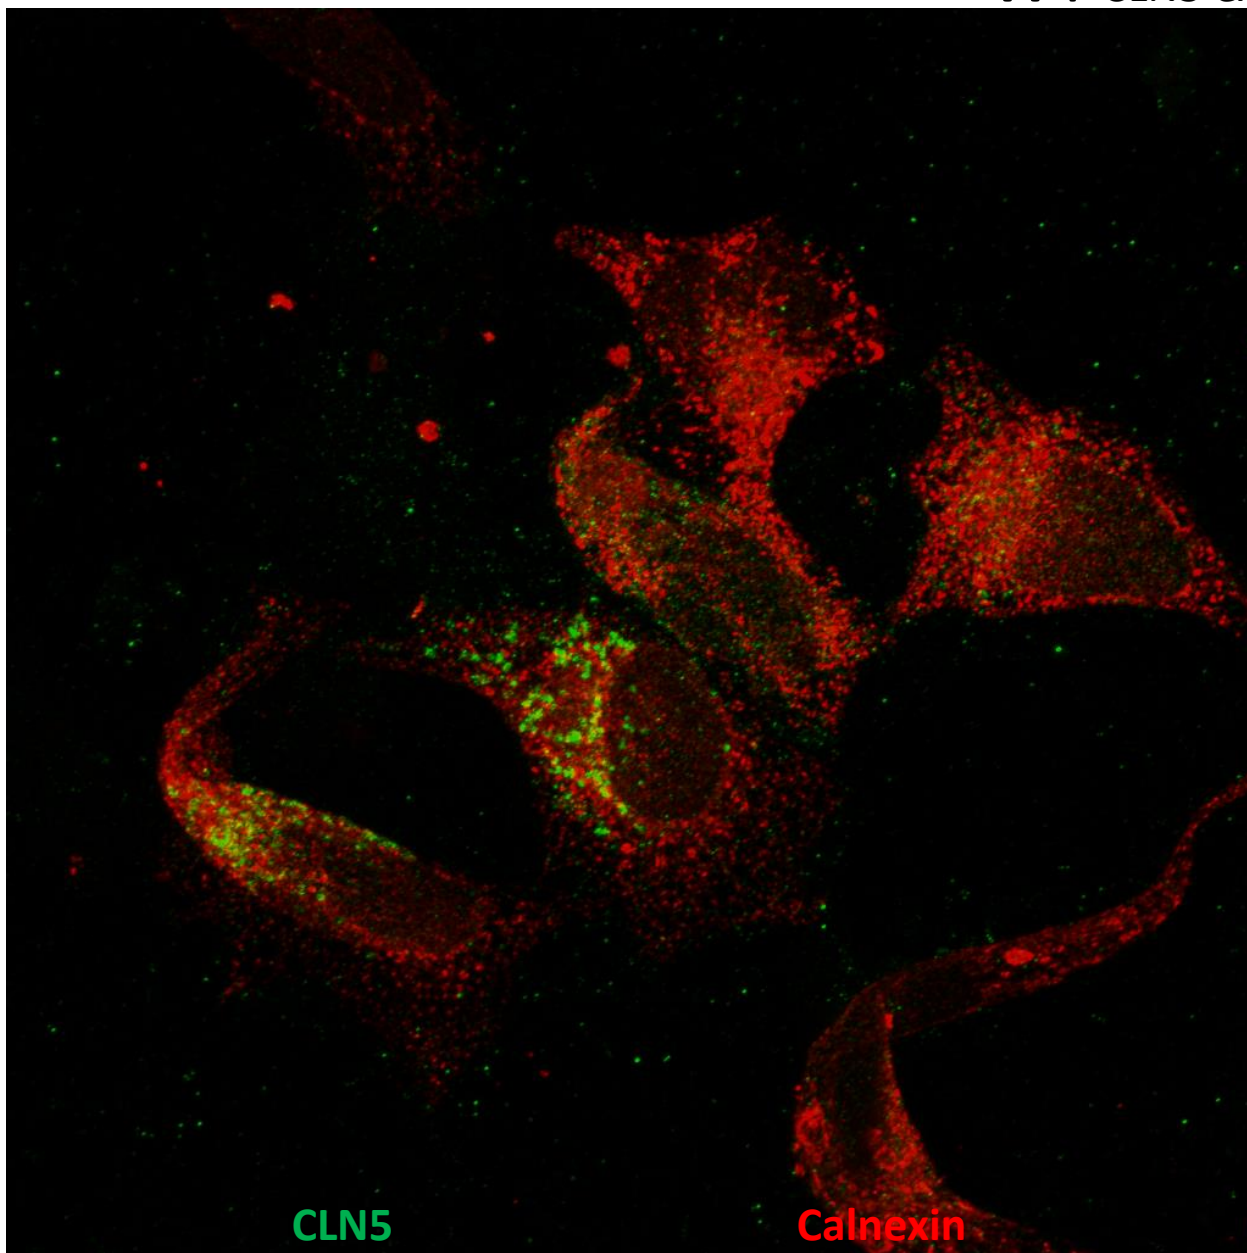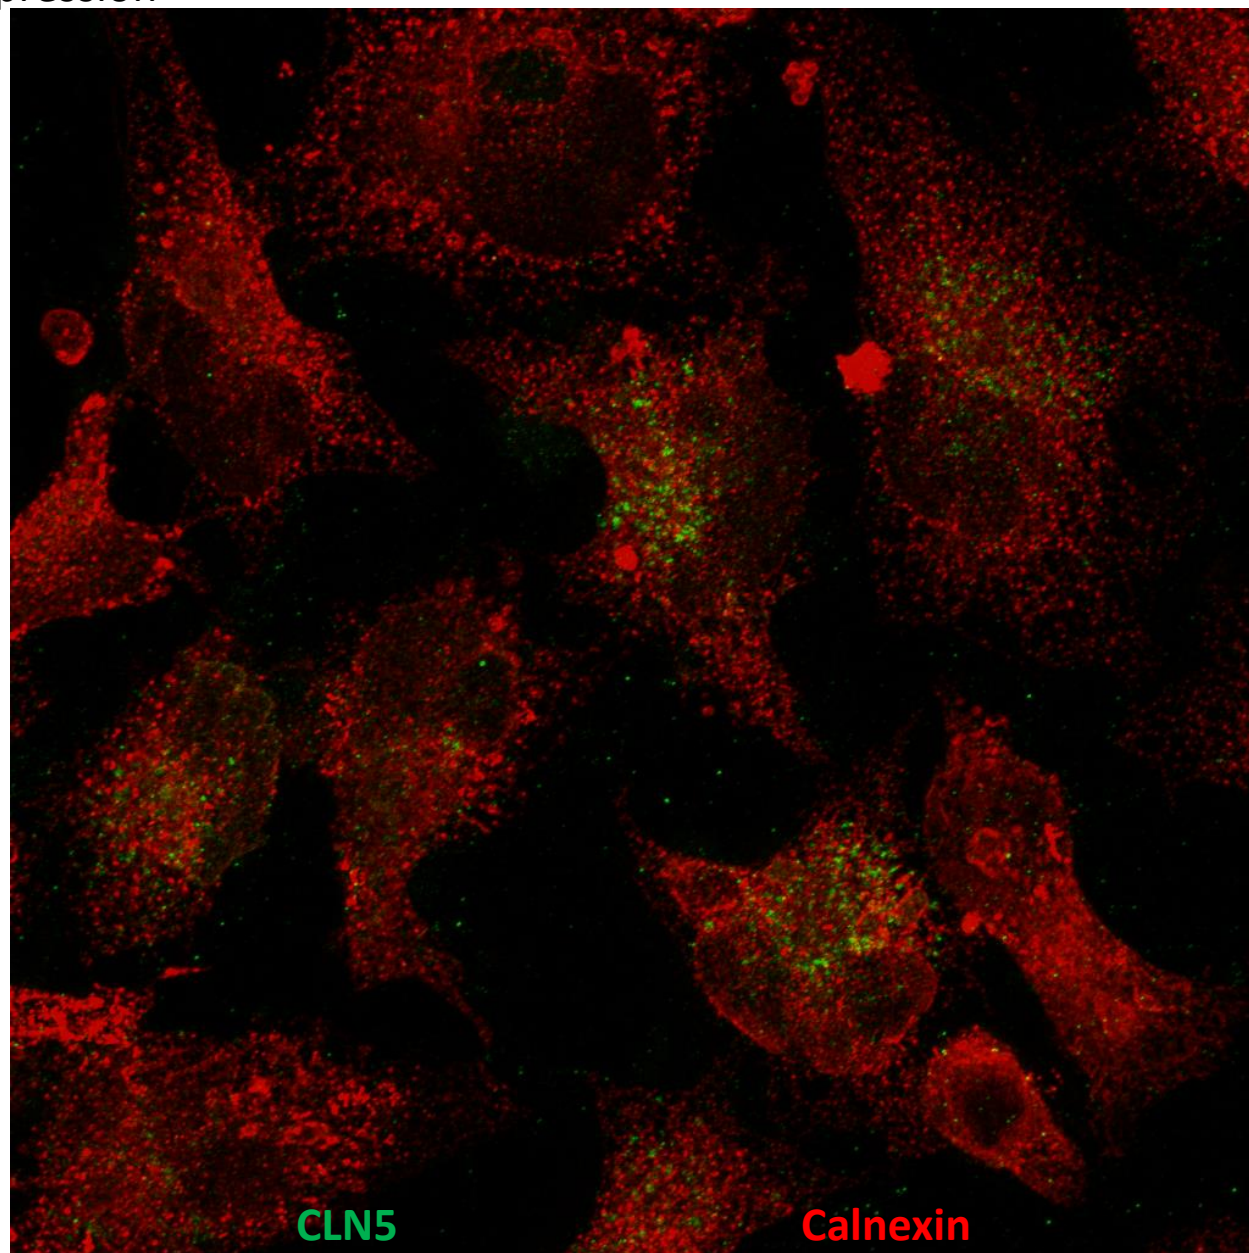

WT CLN5 expression

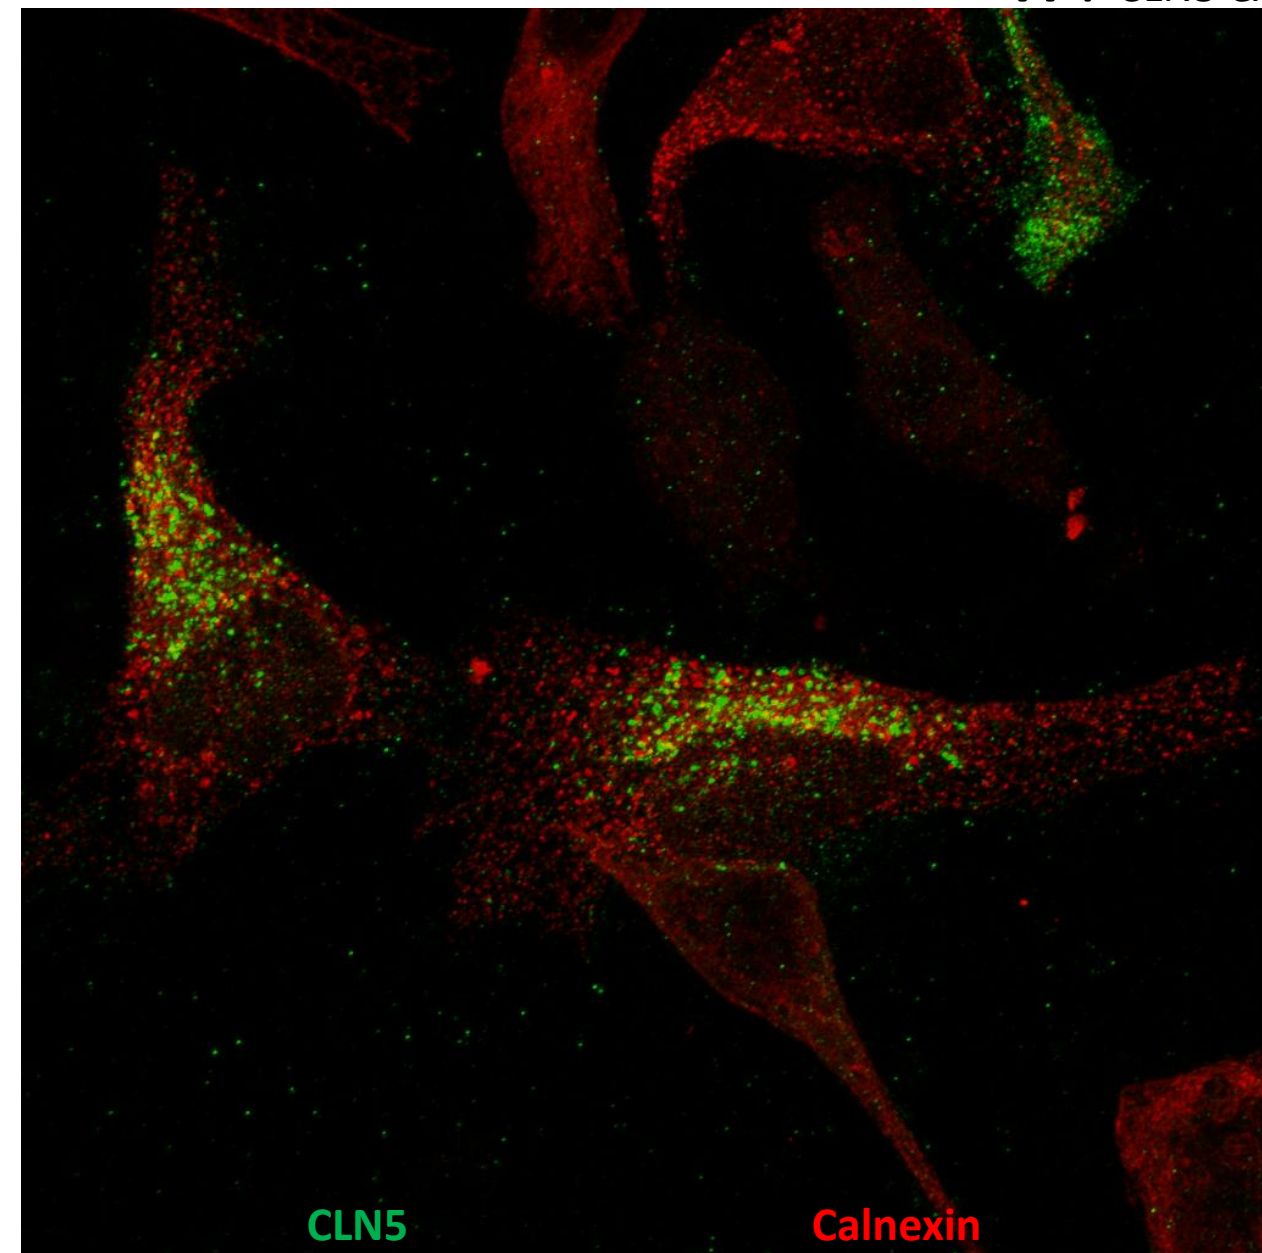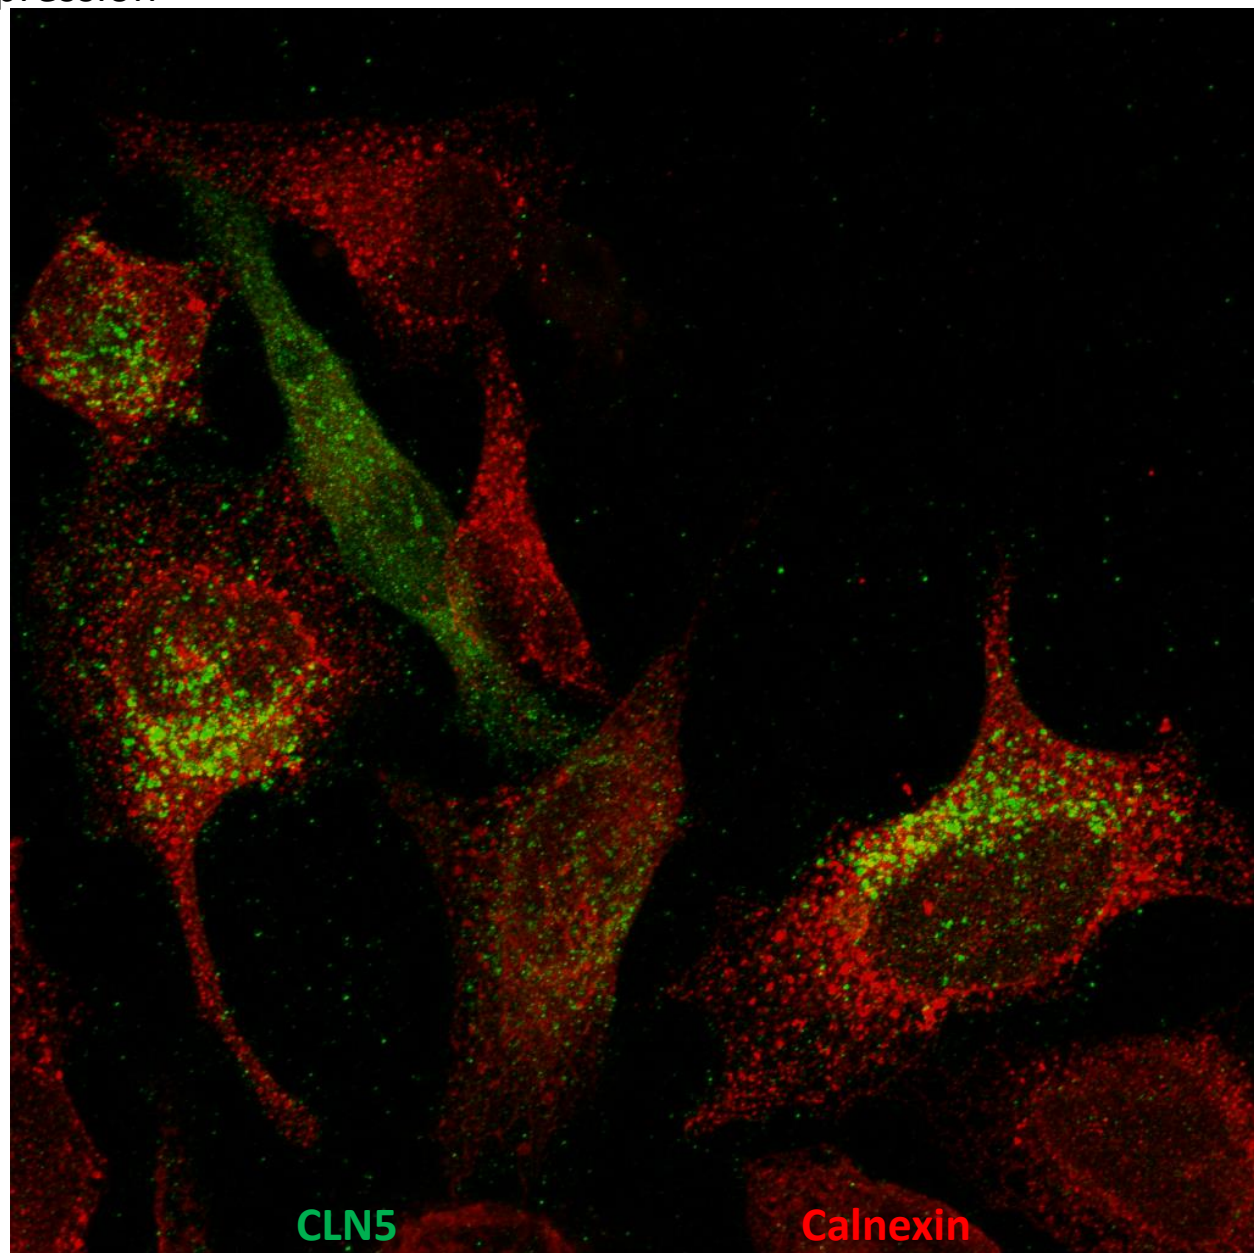

WT CLN5 expression

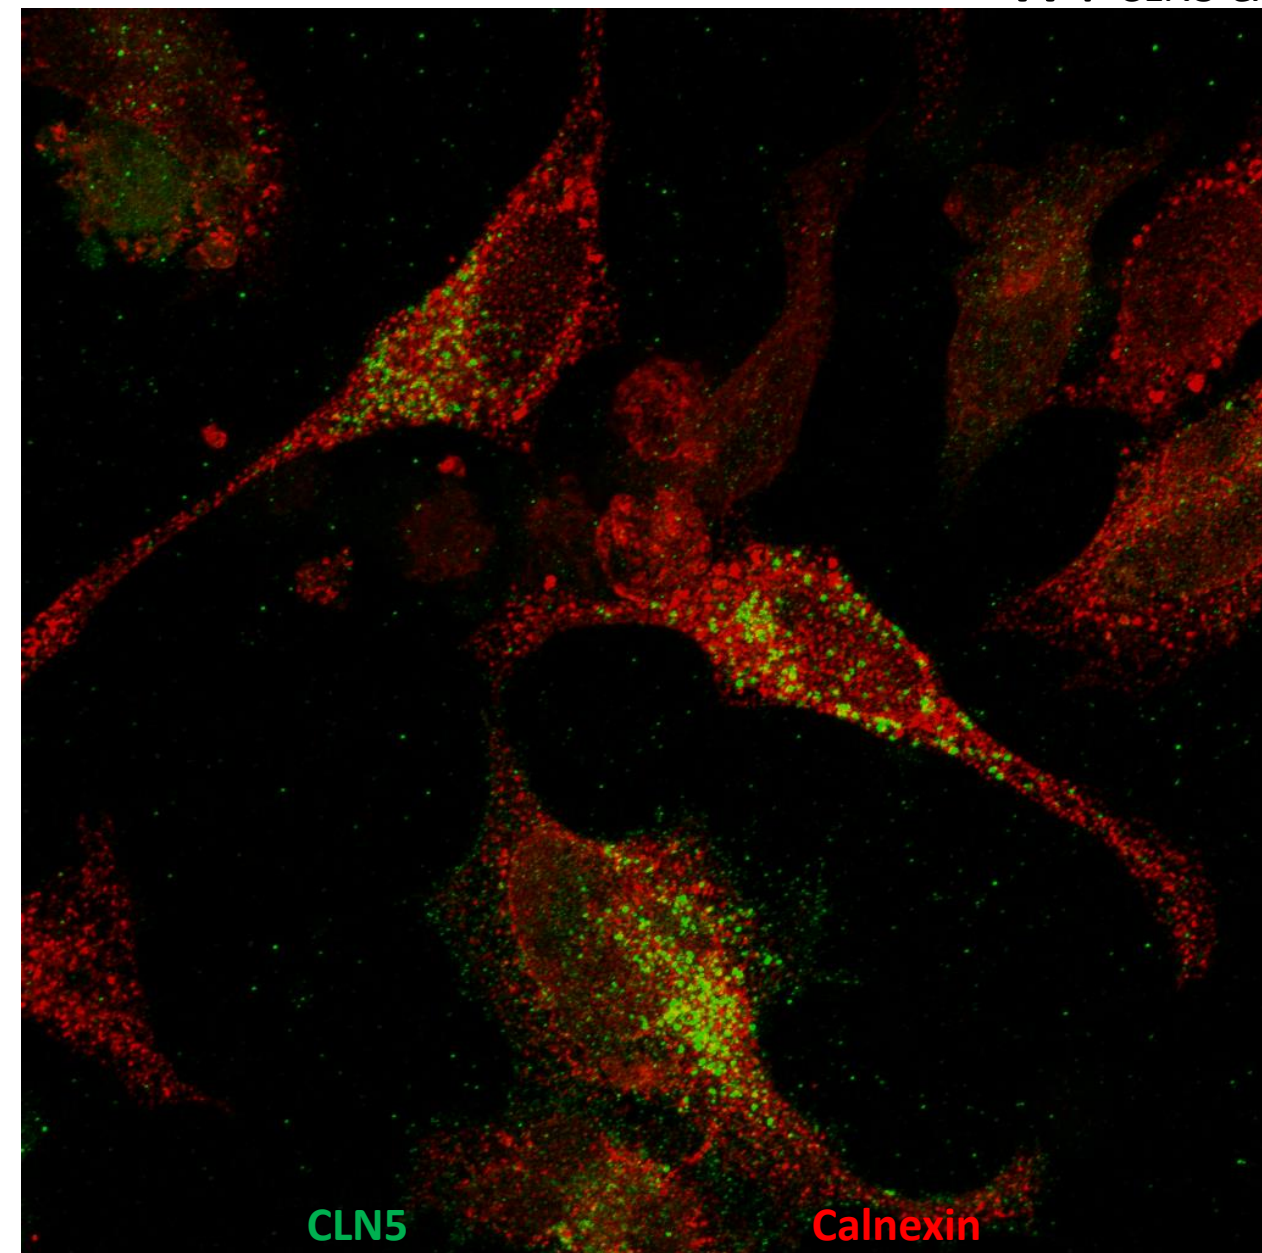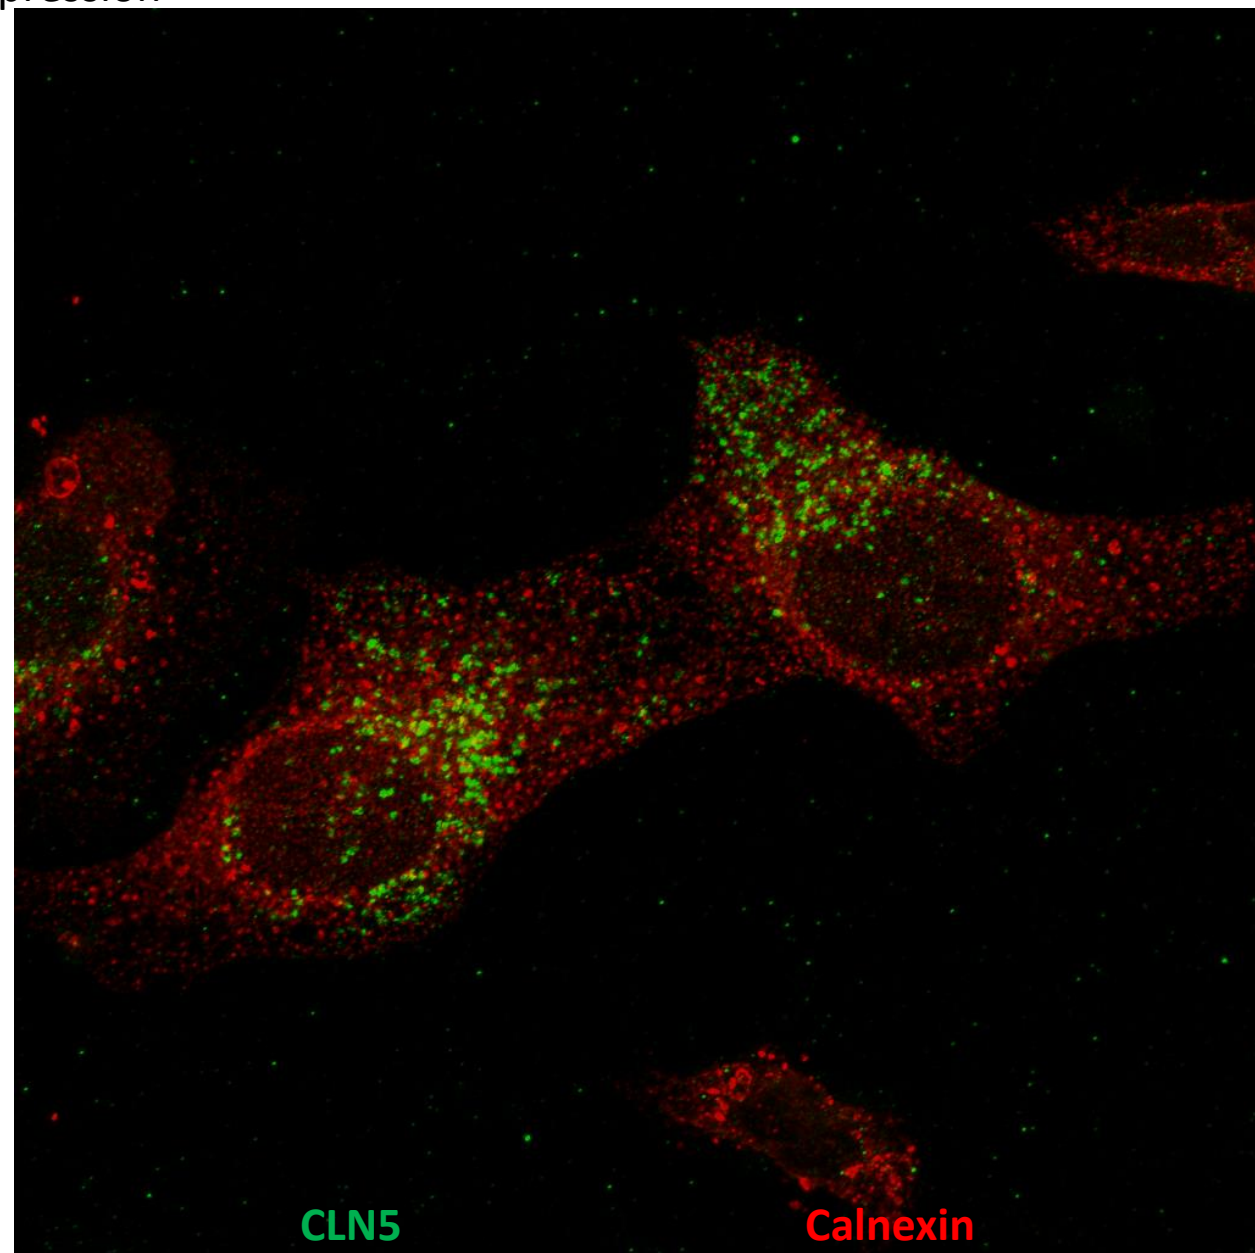

N320S CLN5 expression  
and co-localization with  
ER marker Calnexin

# N320S CLN5 expression

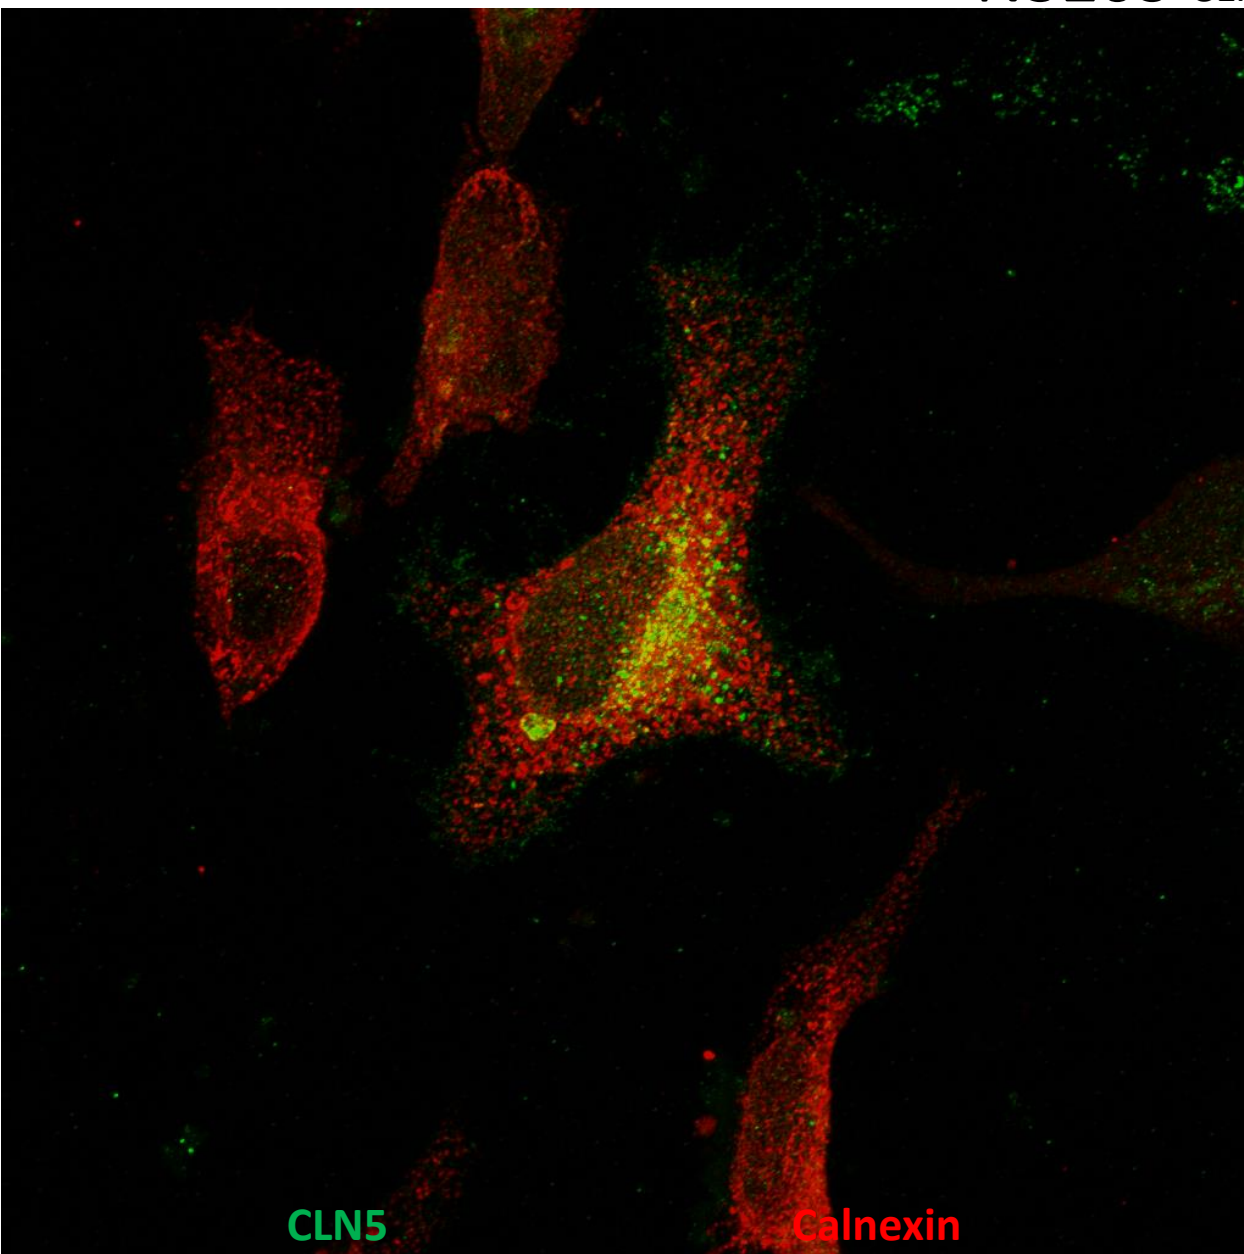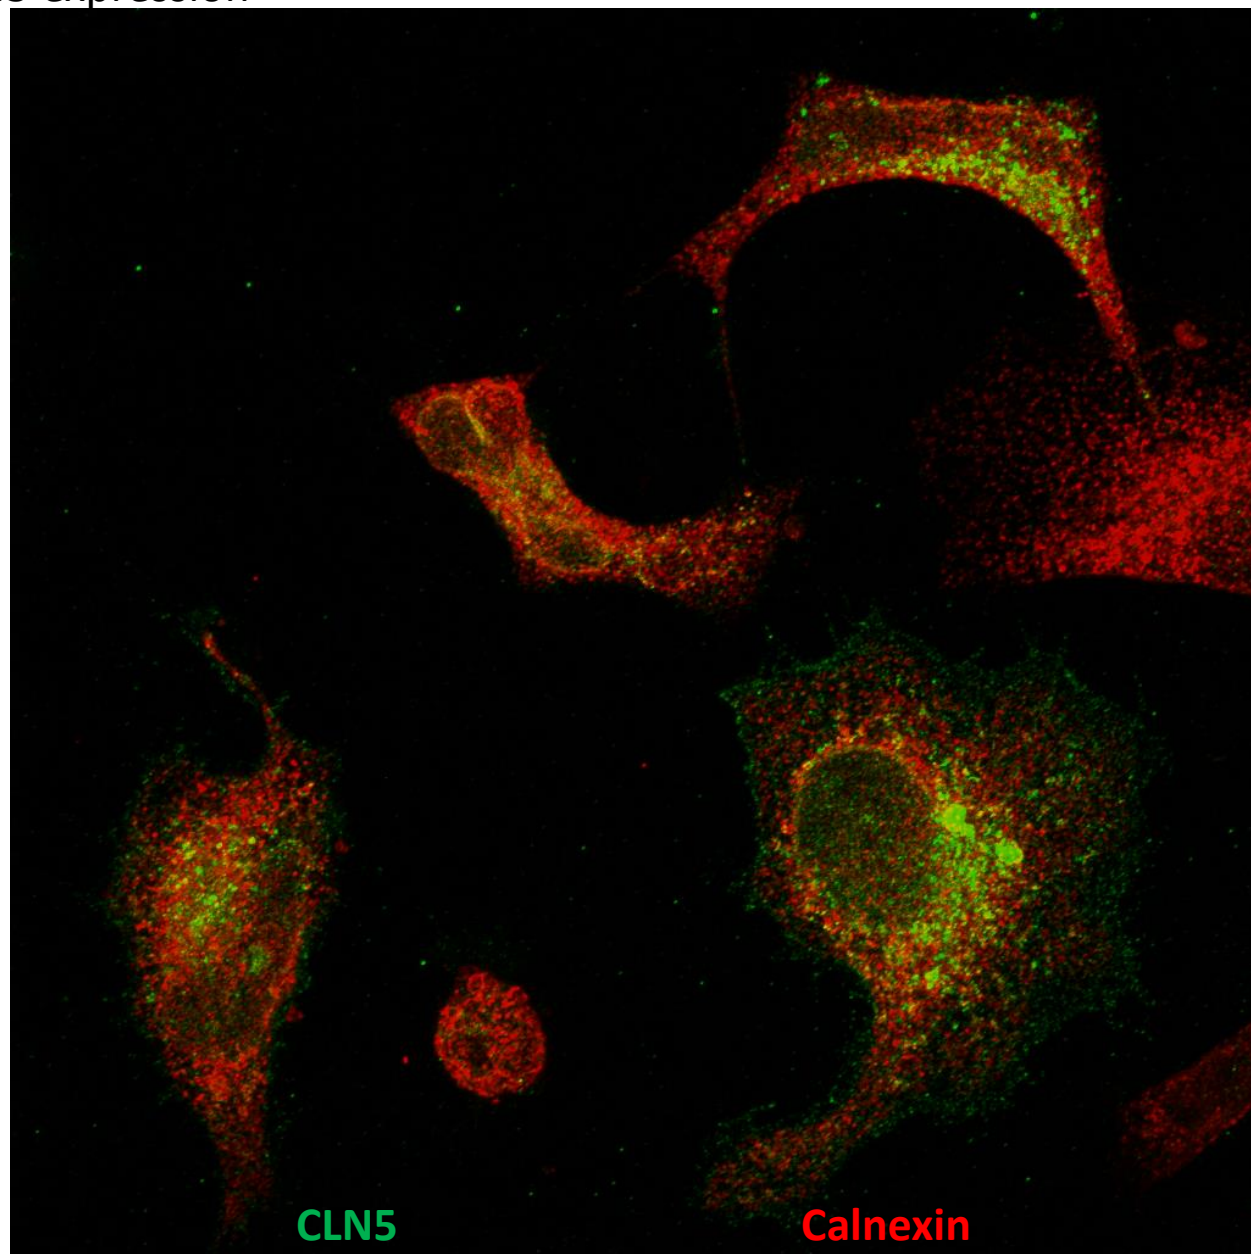

N320S CLN5 expression

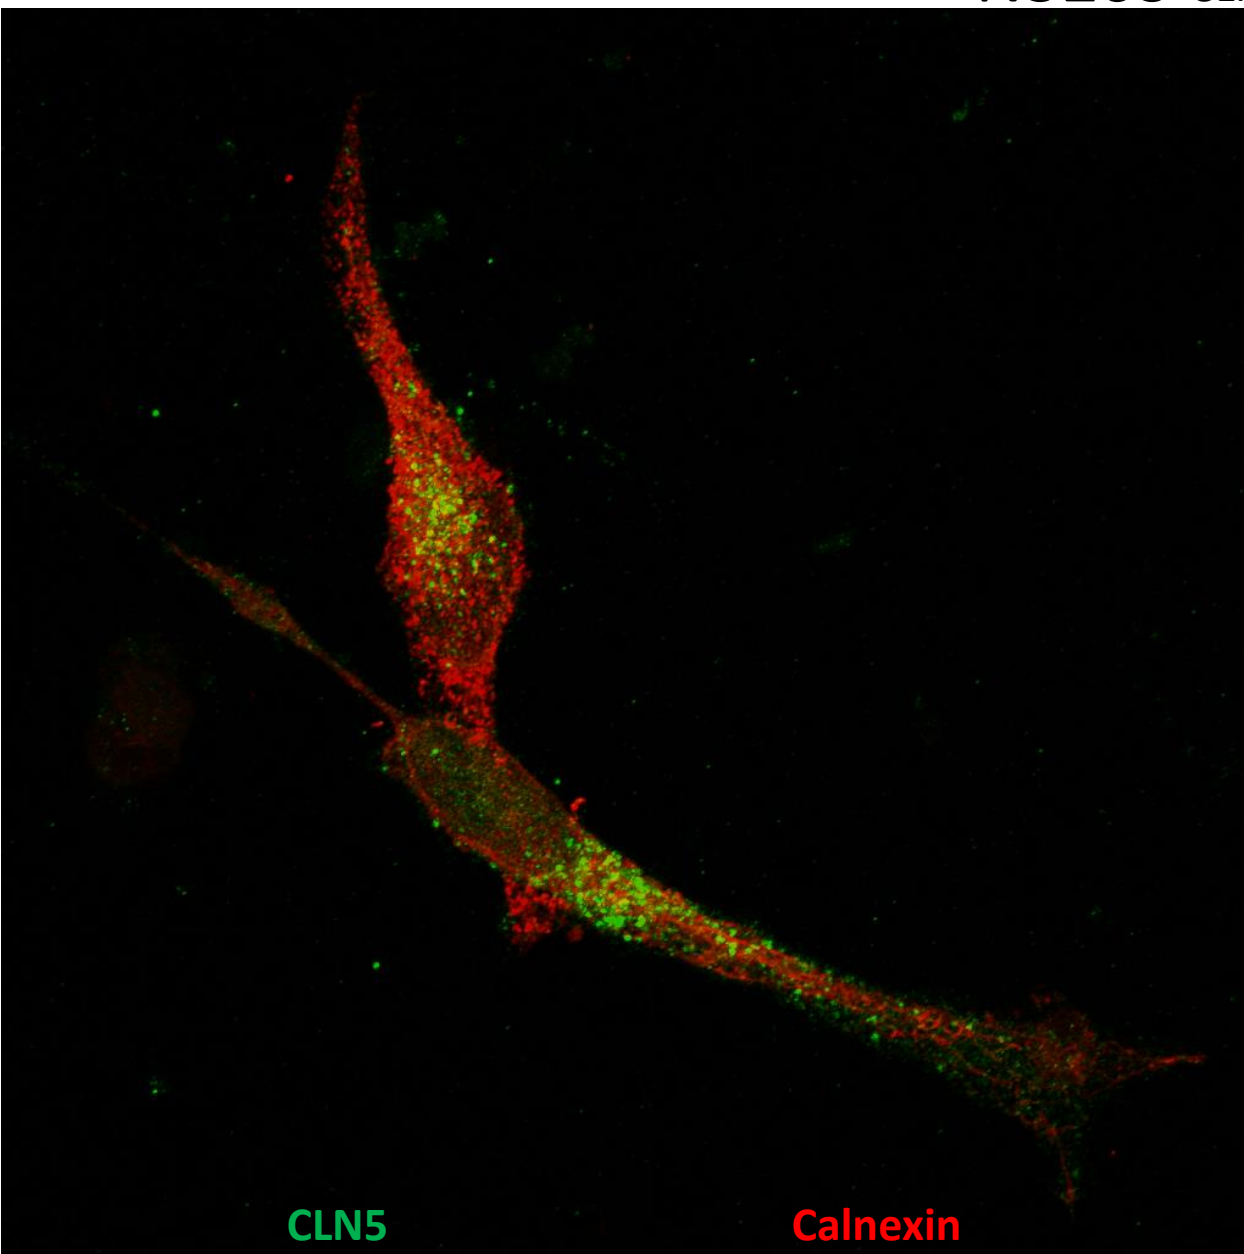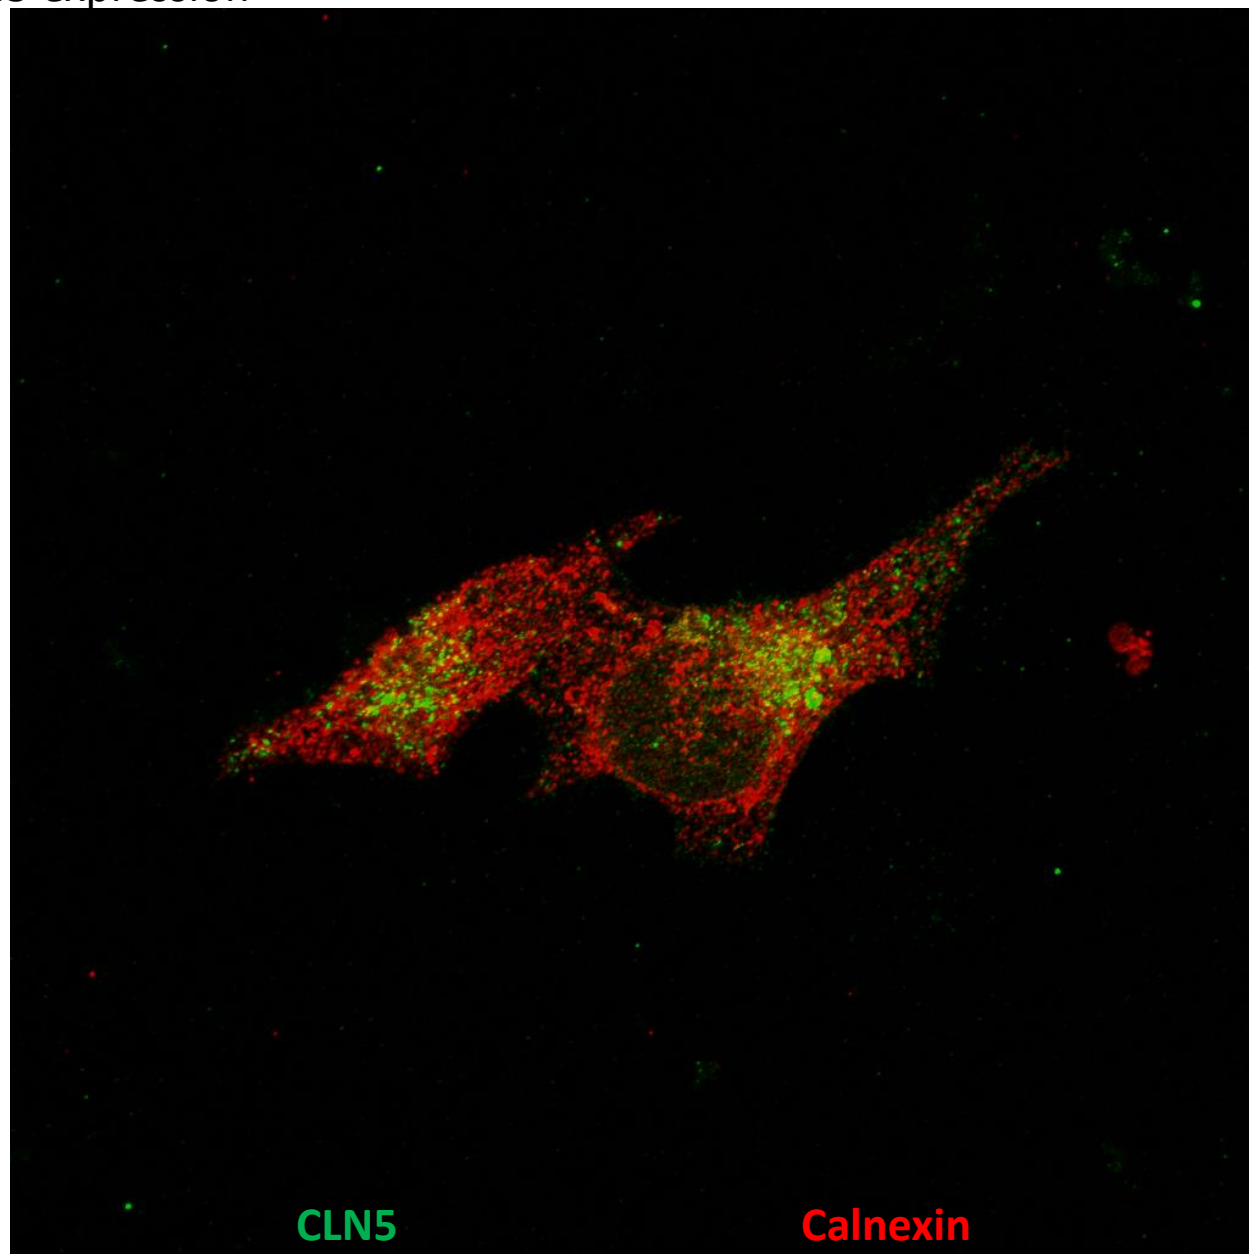

# N320S CLN5 expression

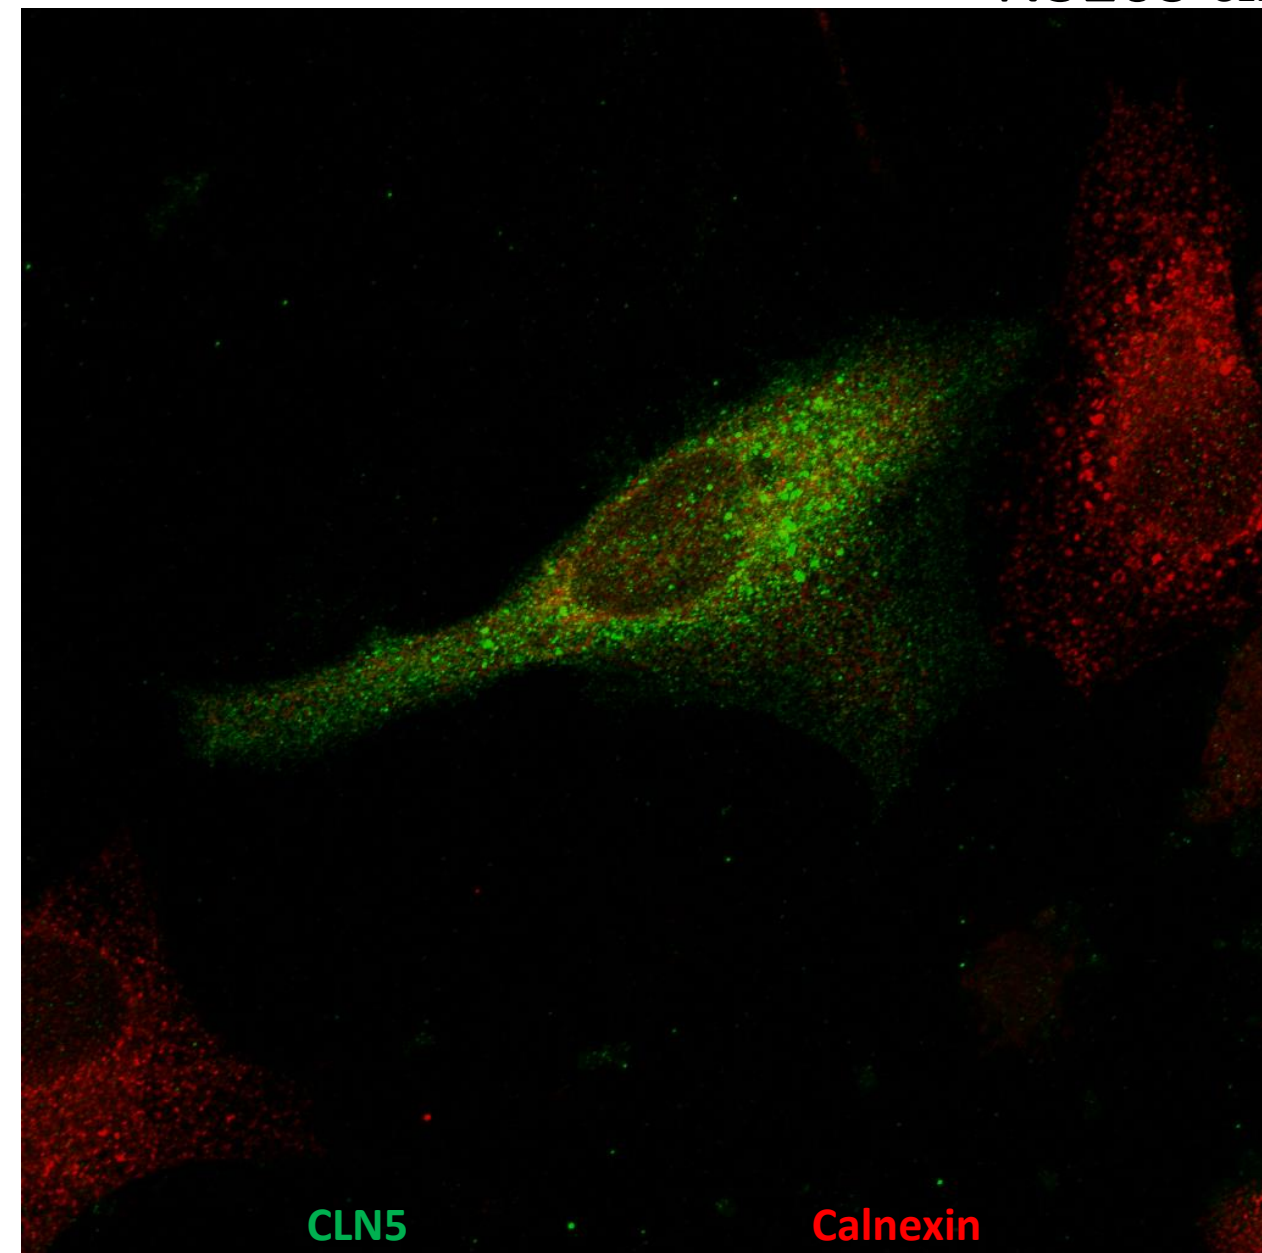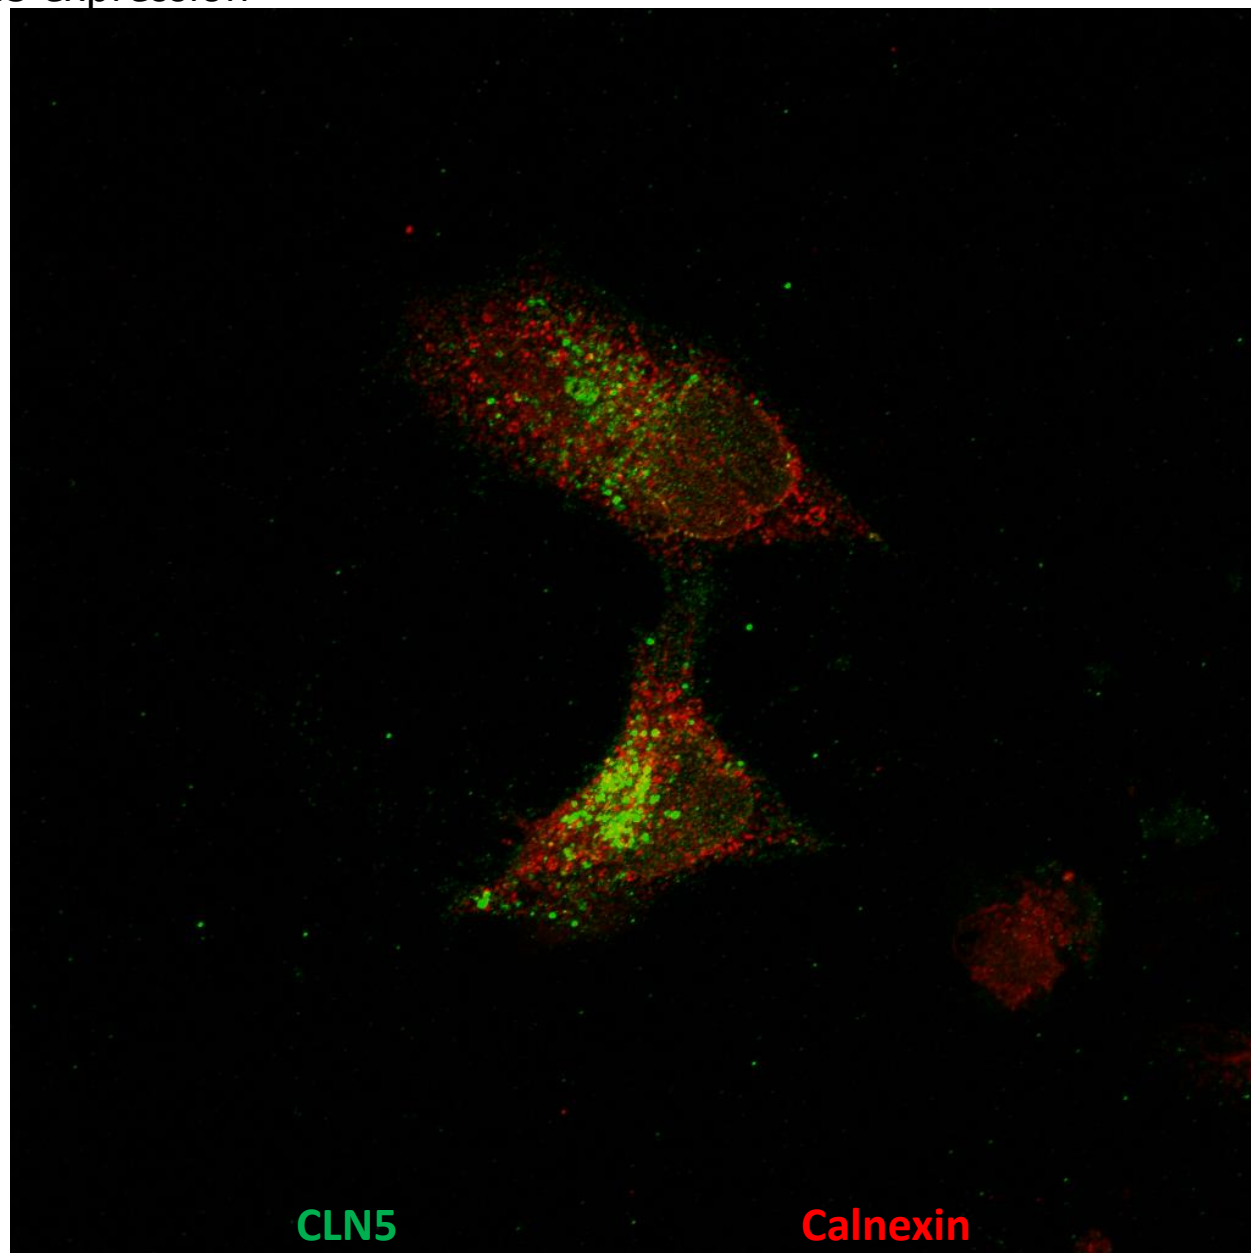



# N320S CLN5 expression

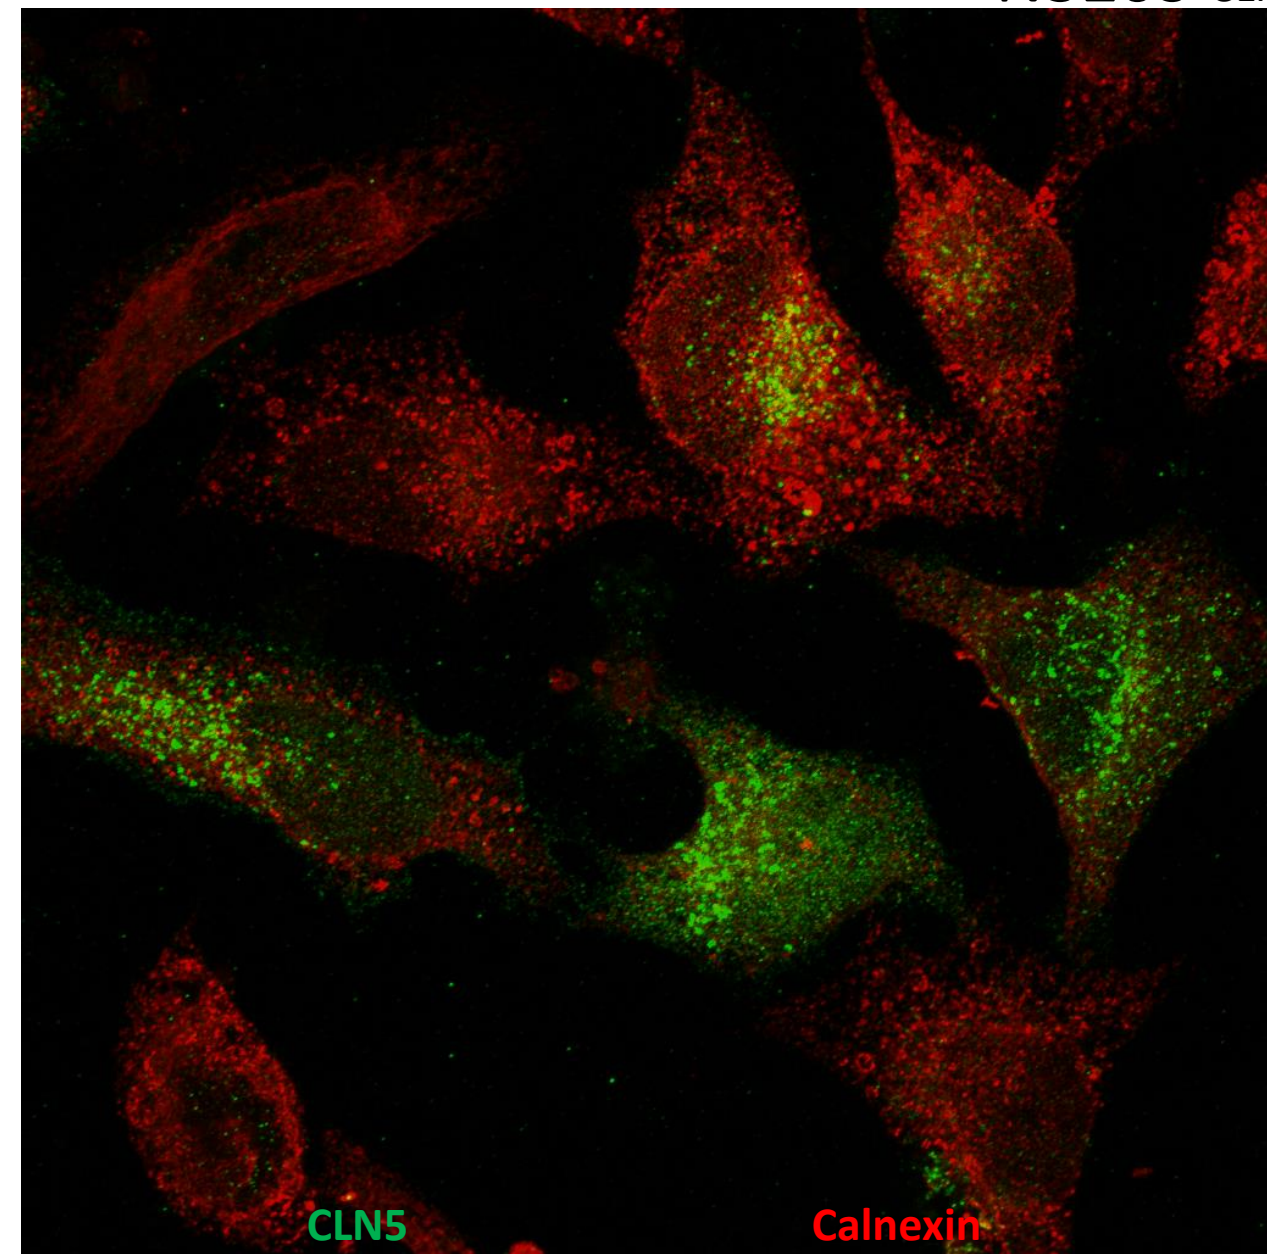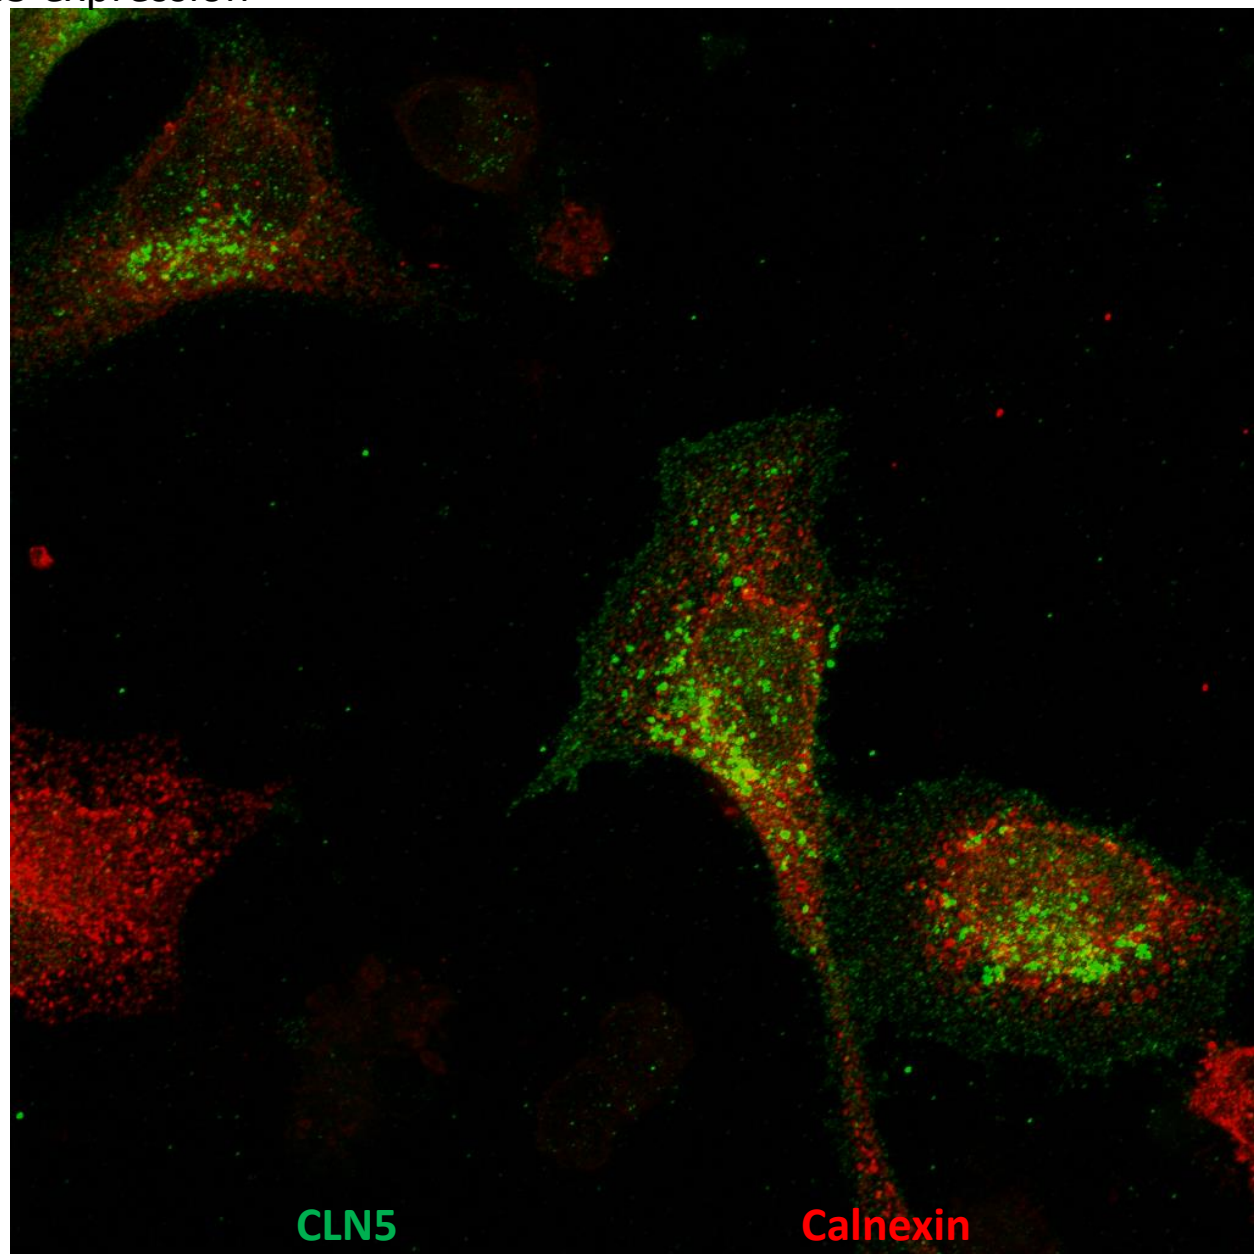

N320S CLN5 expression

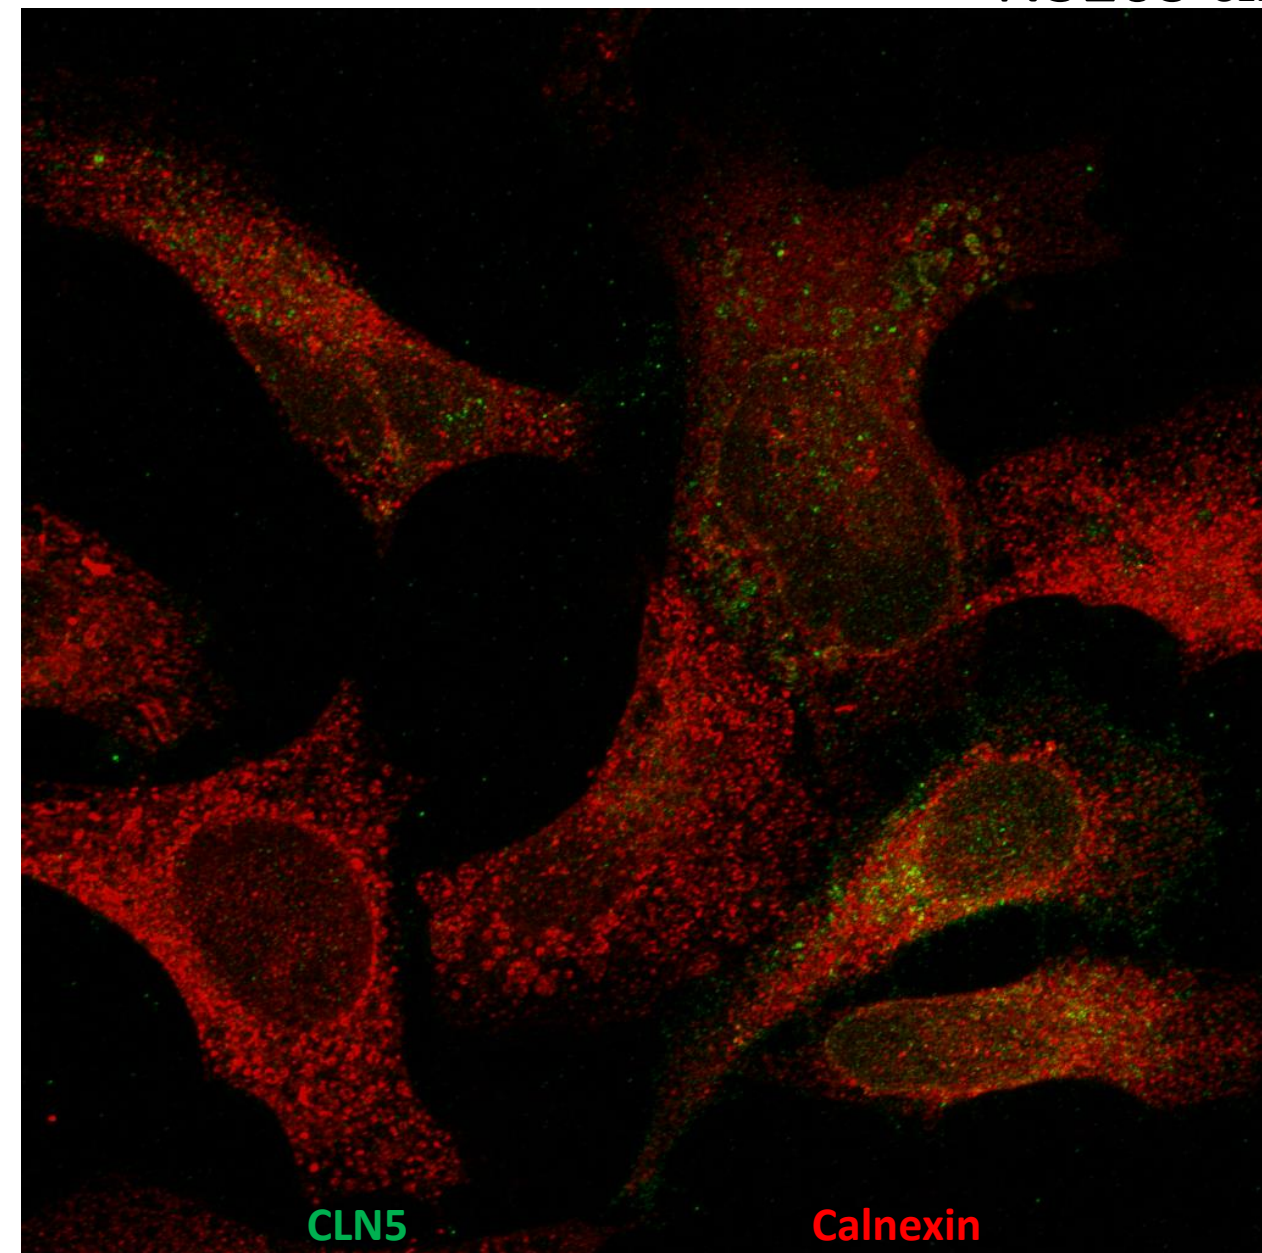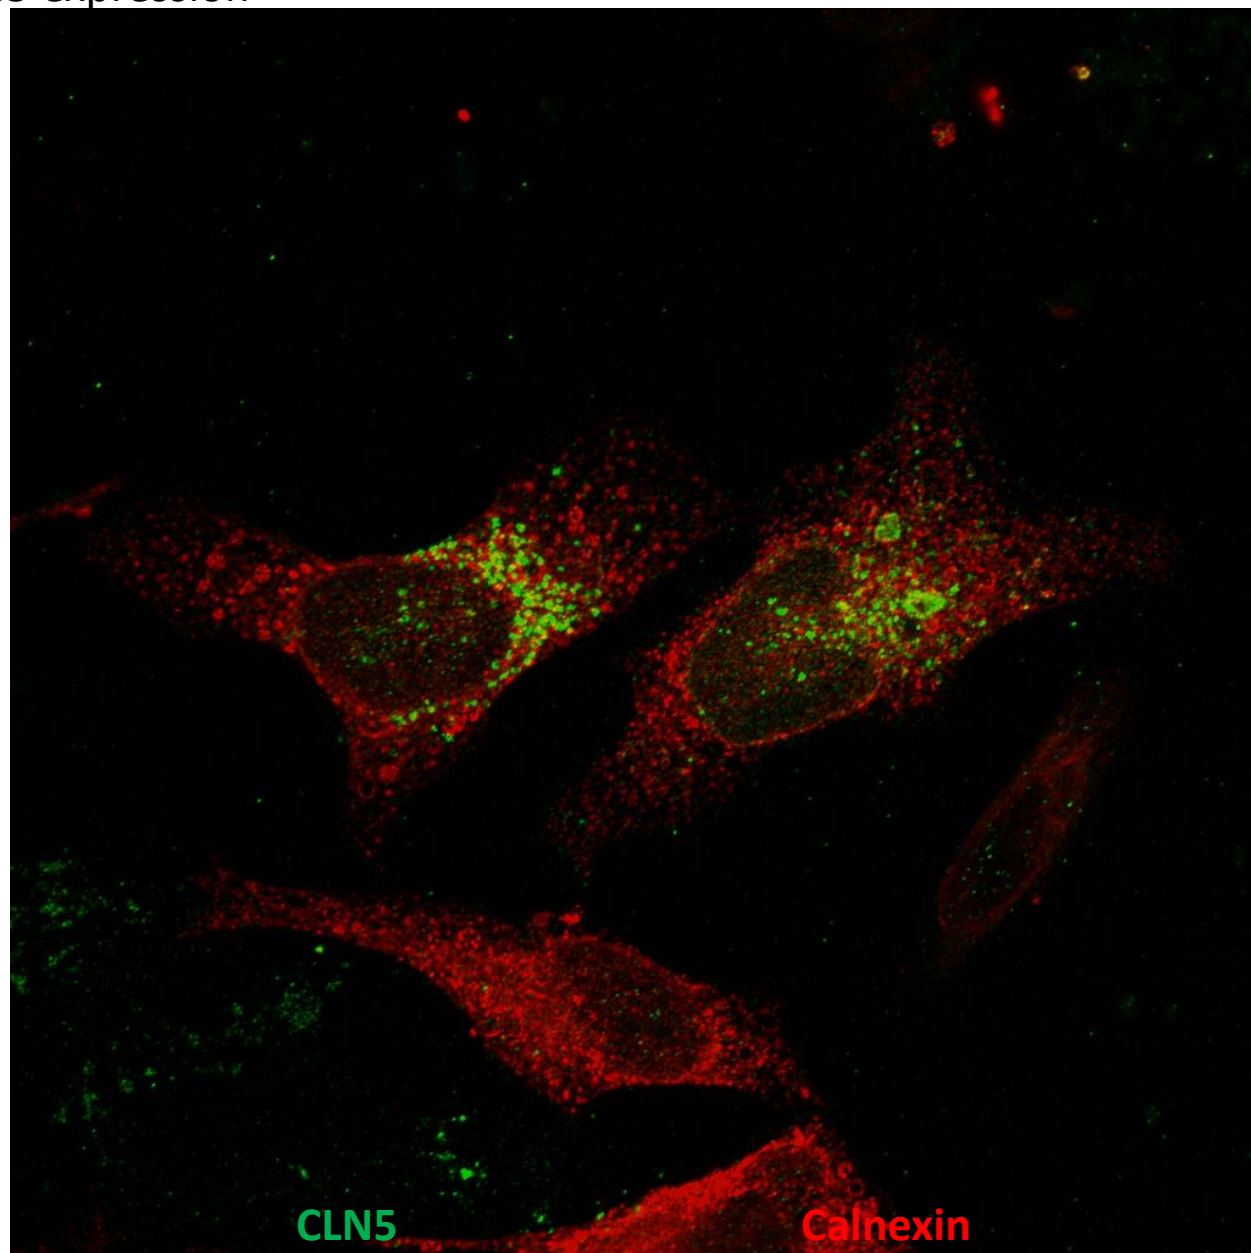

# N320S CLN5 expression

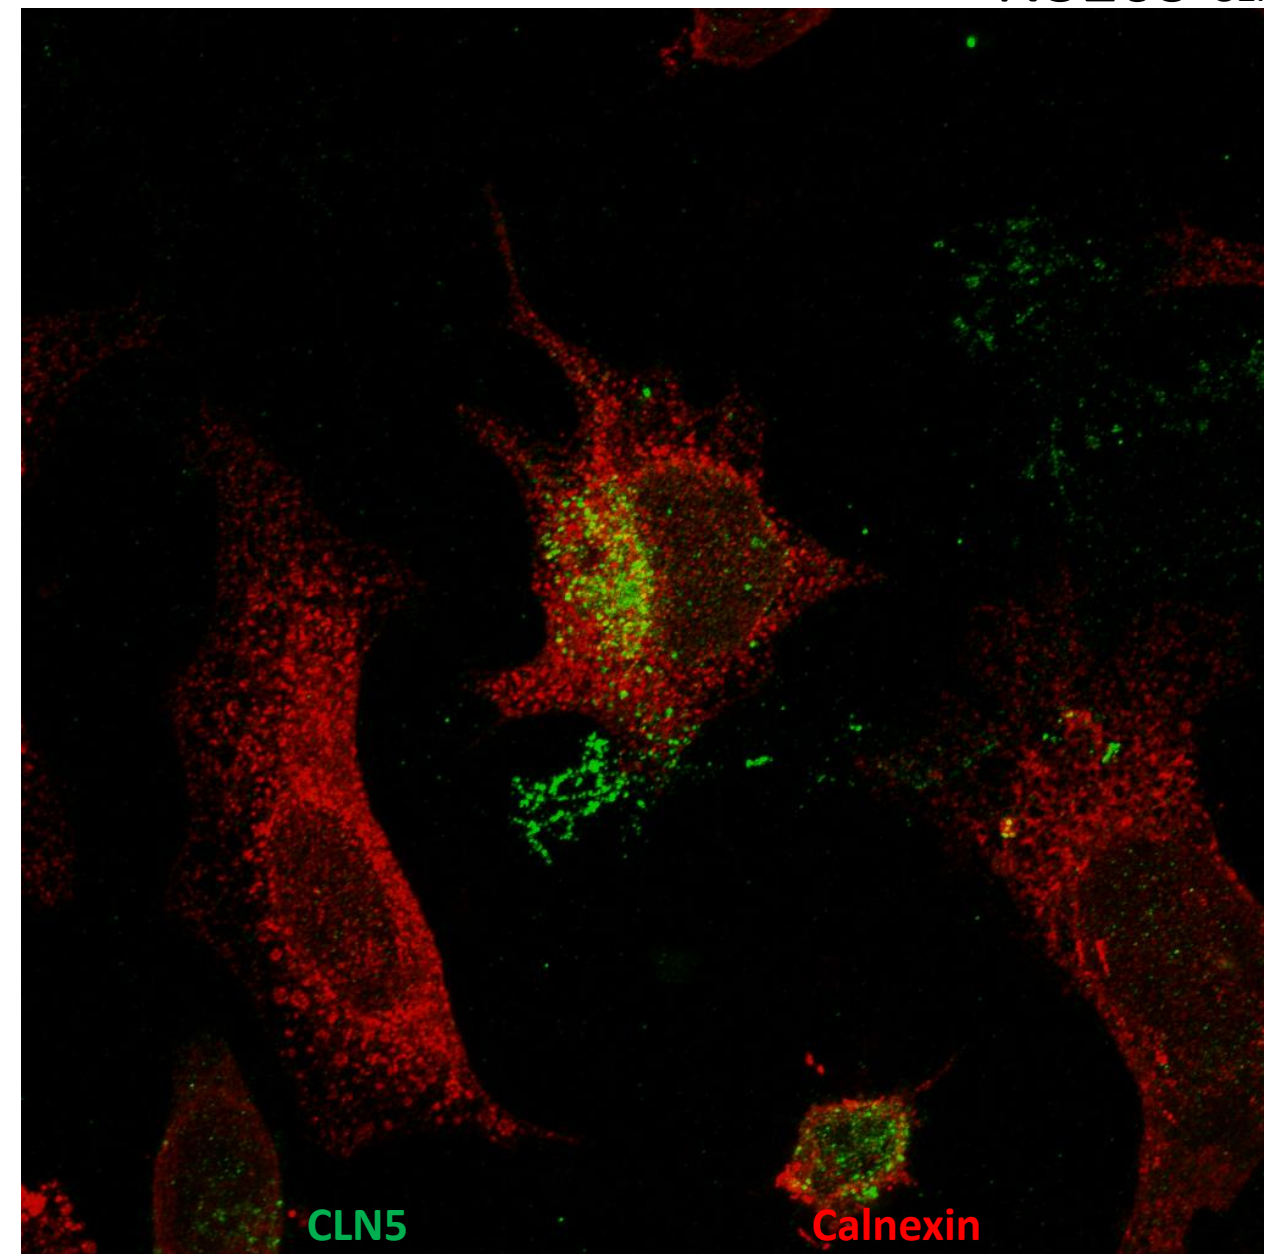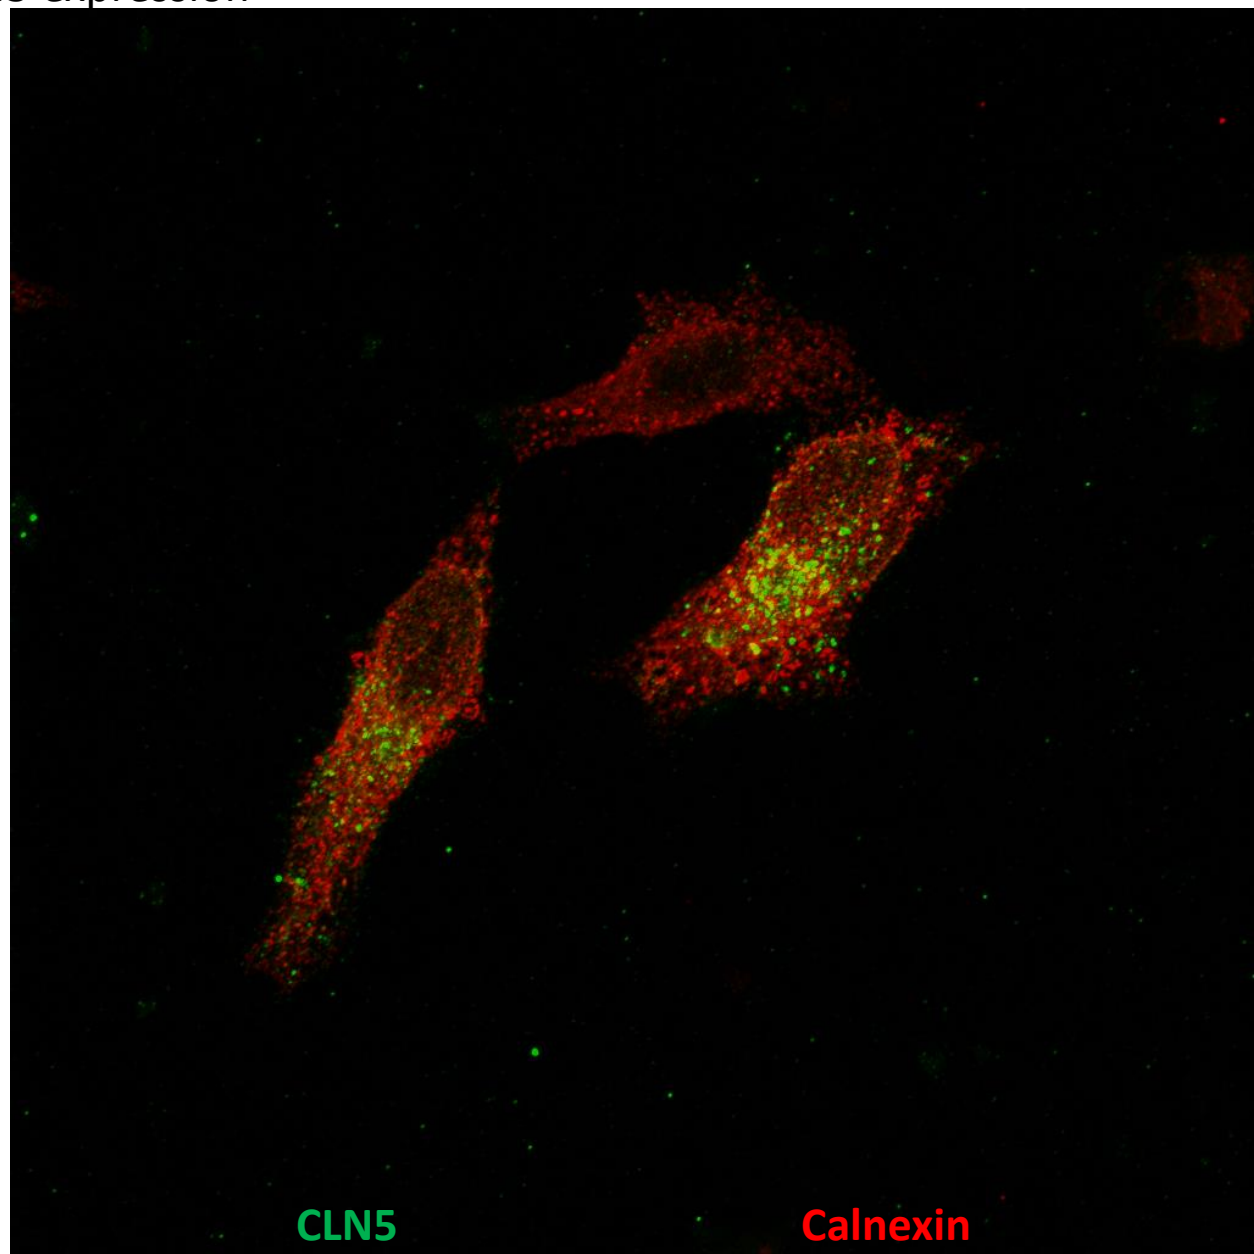

N320S CLN5 expression

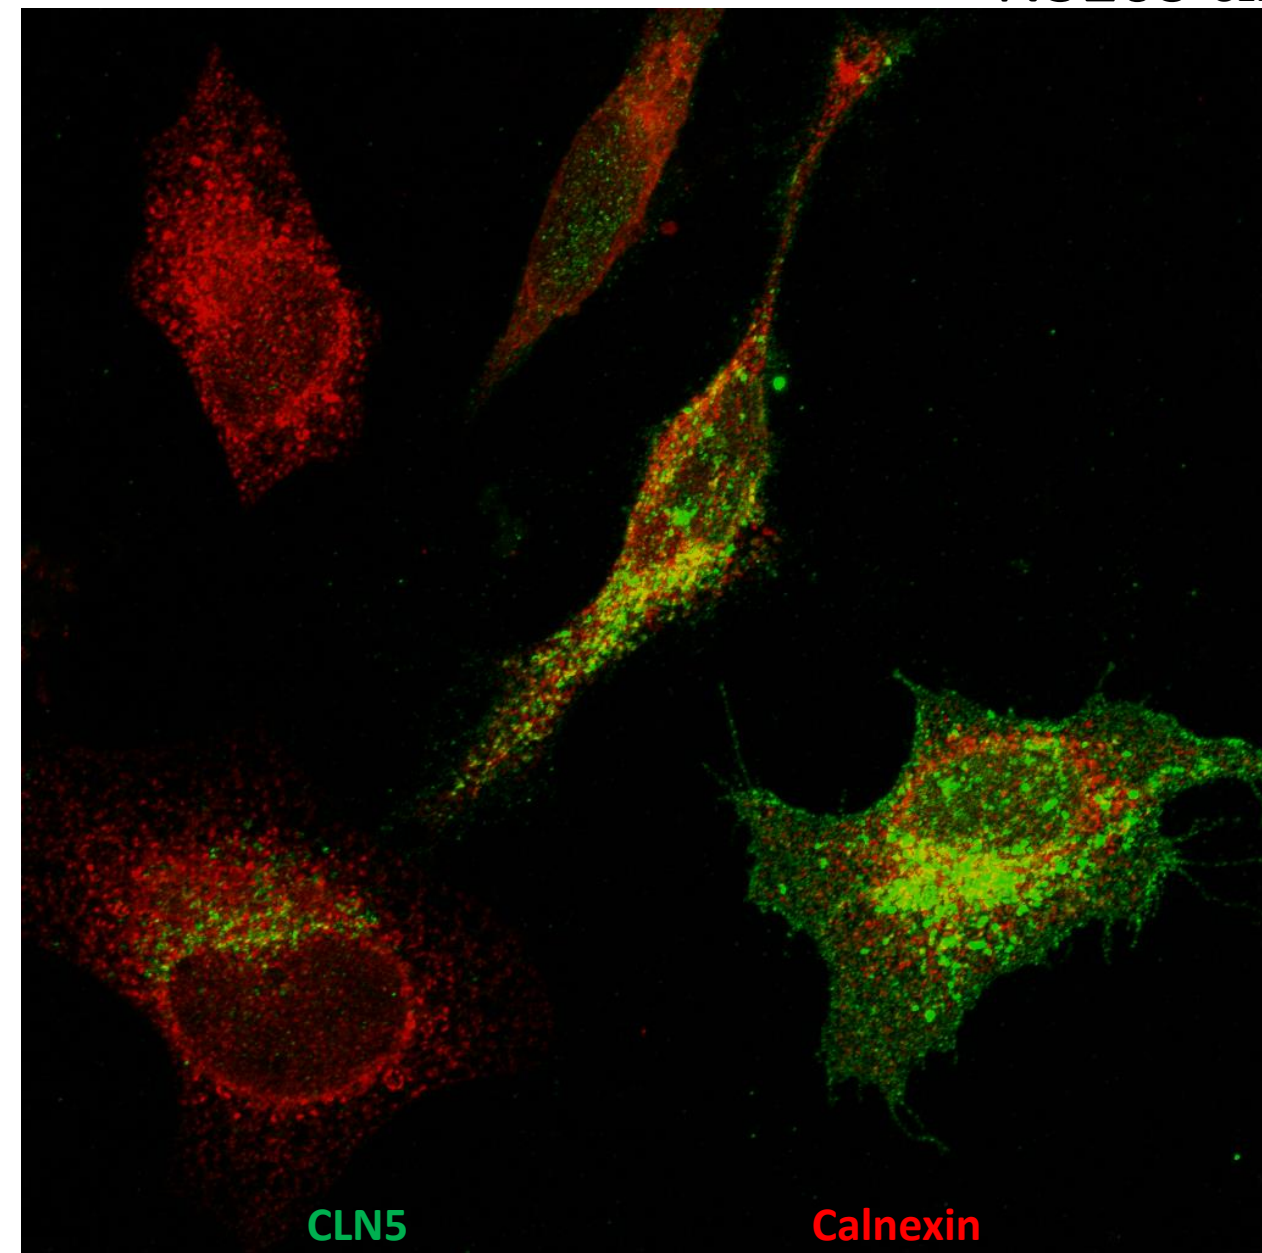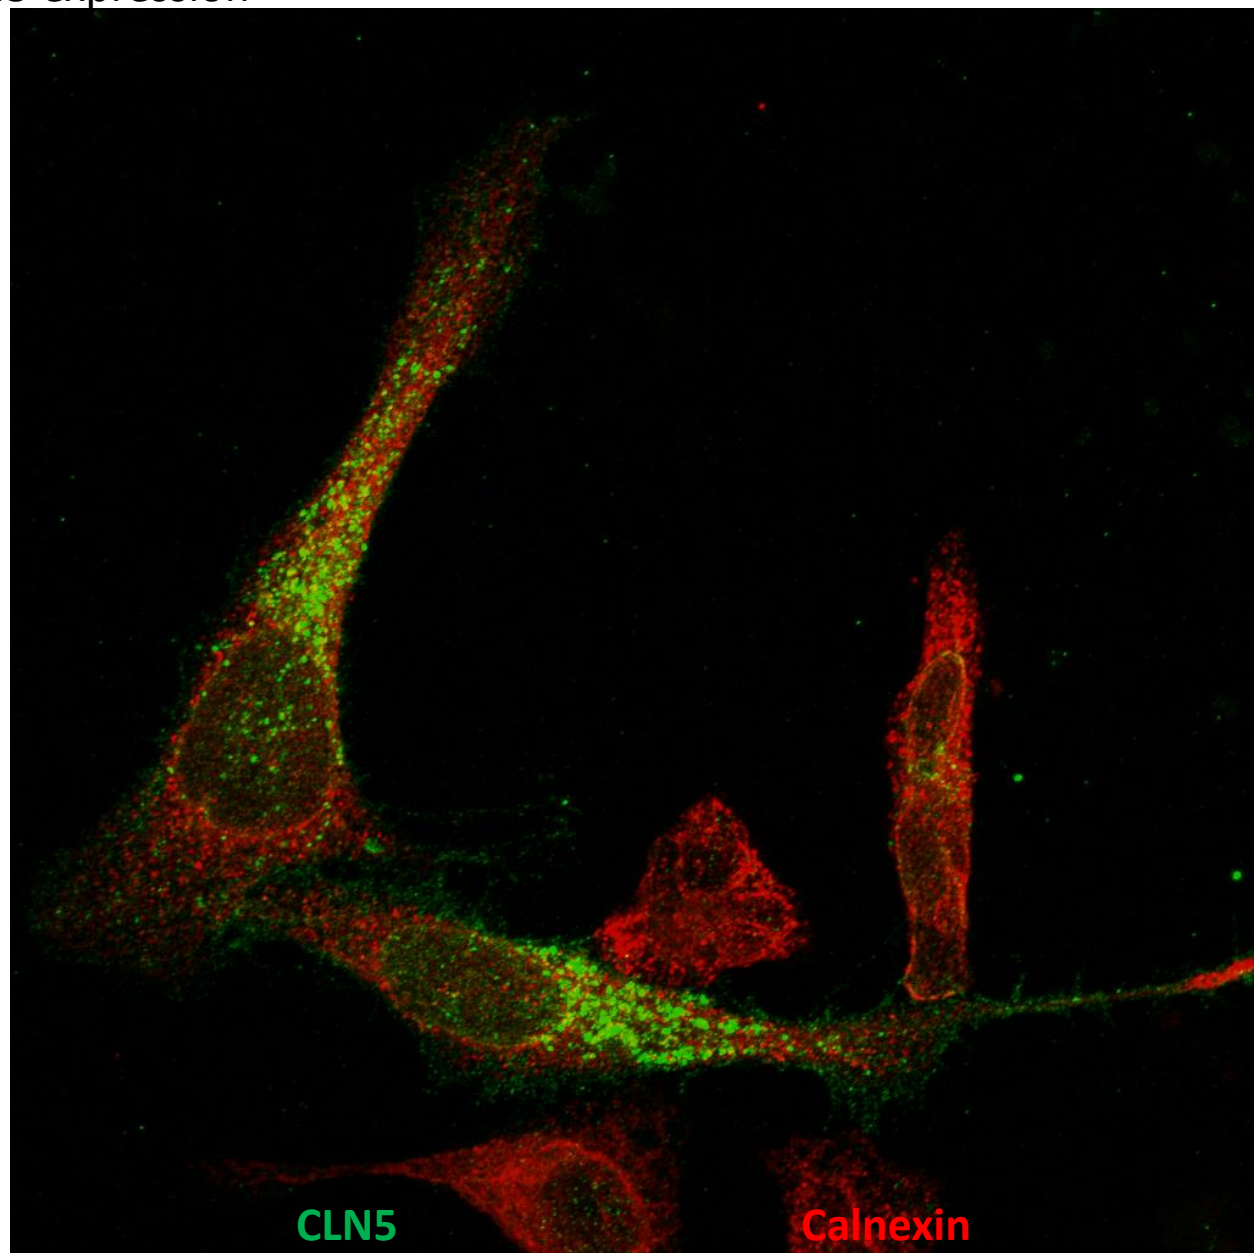

N320S CLN5 expression

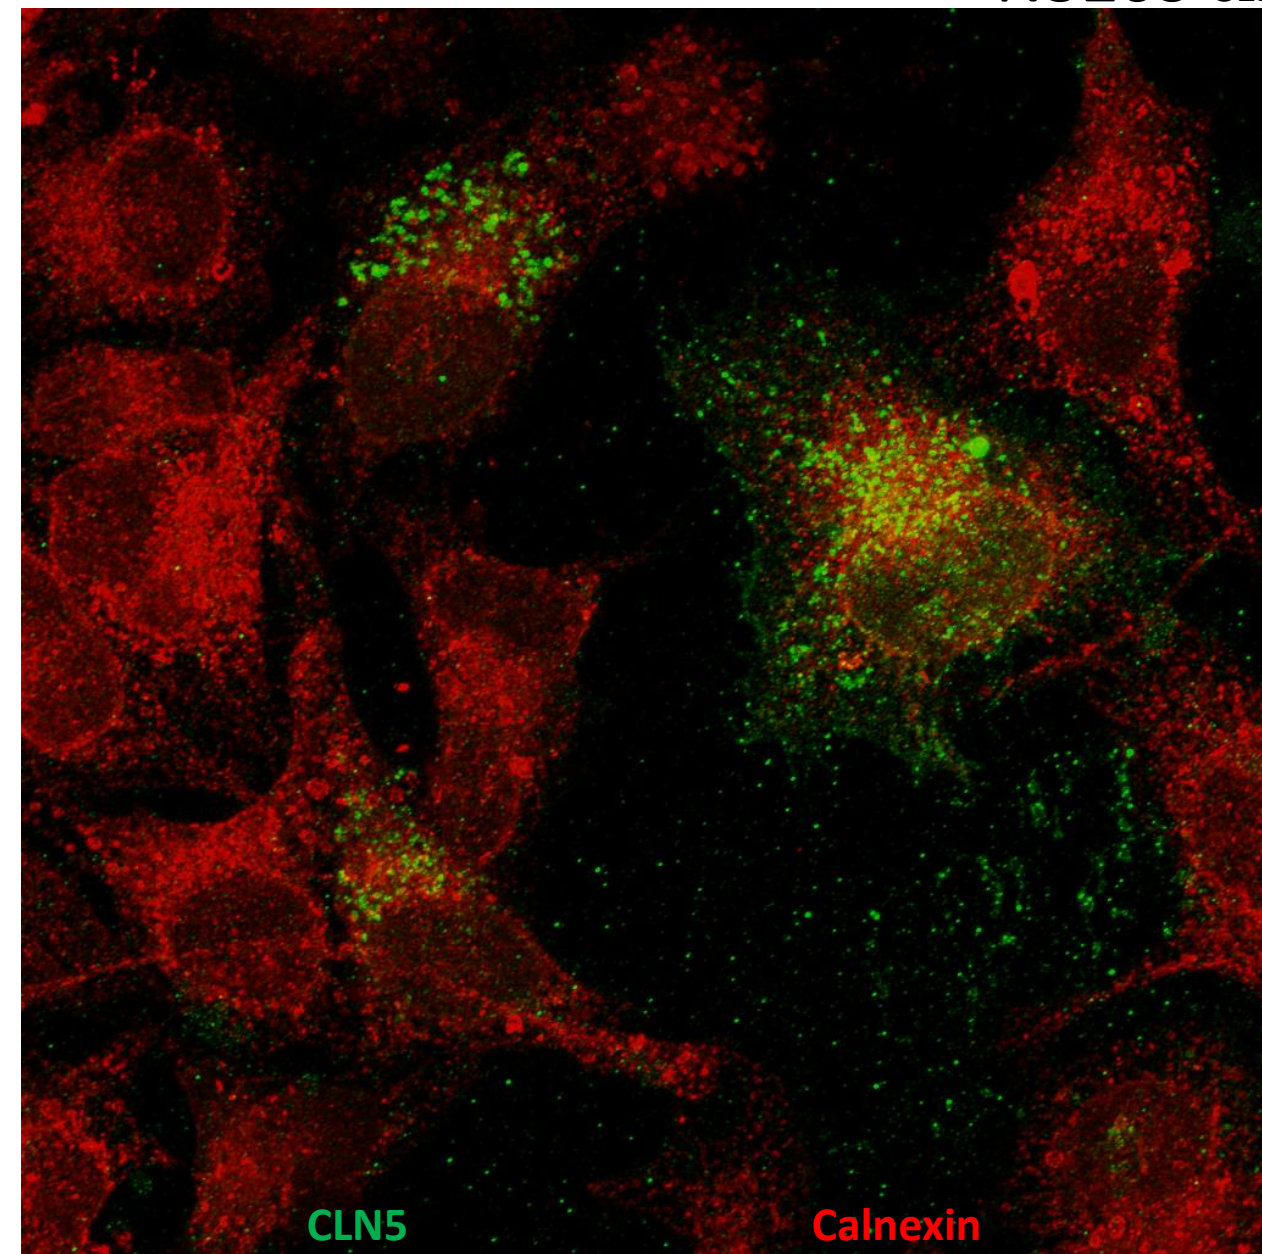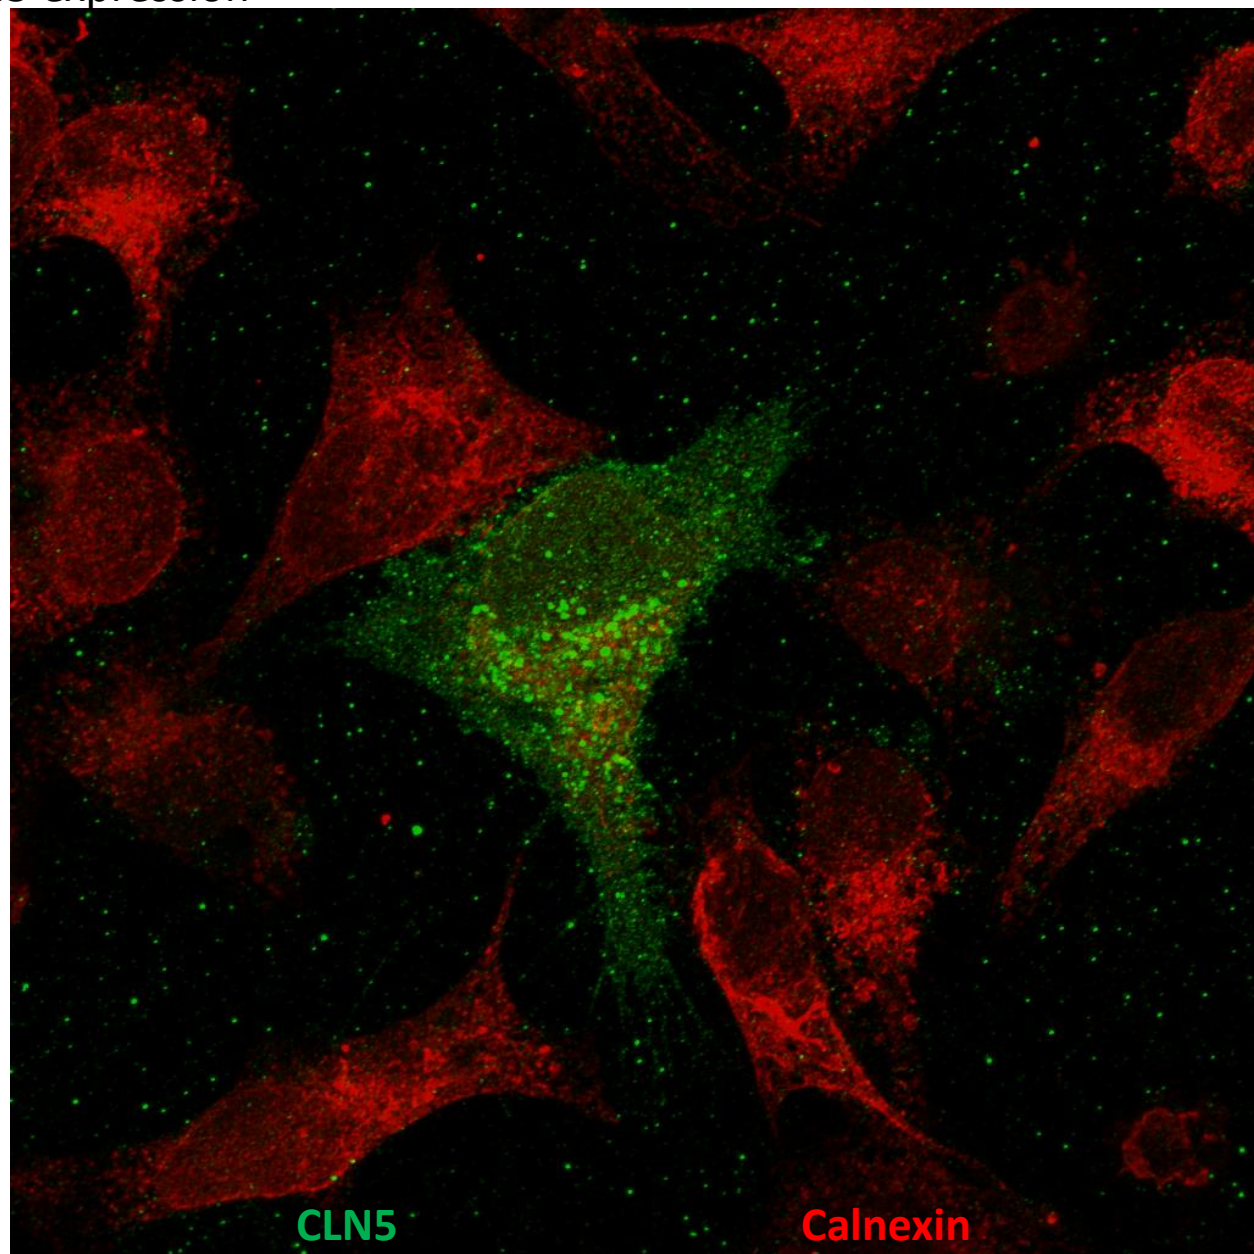

# N320S CLN5 expression

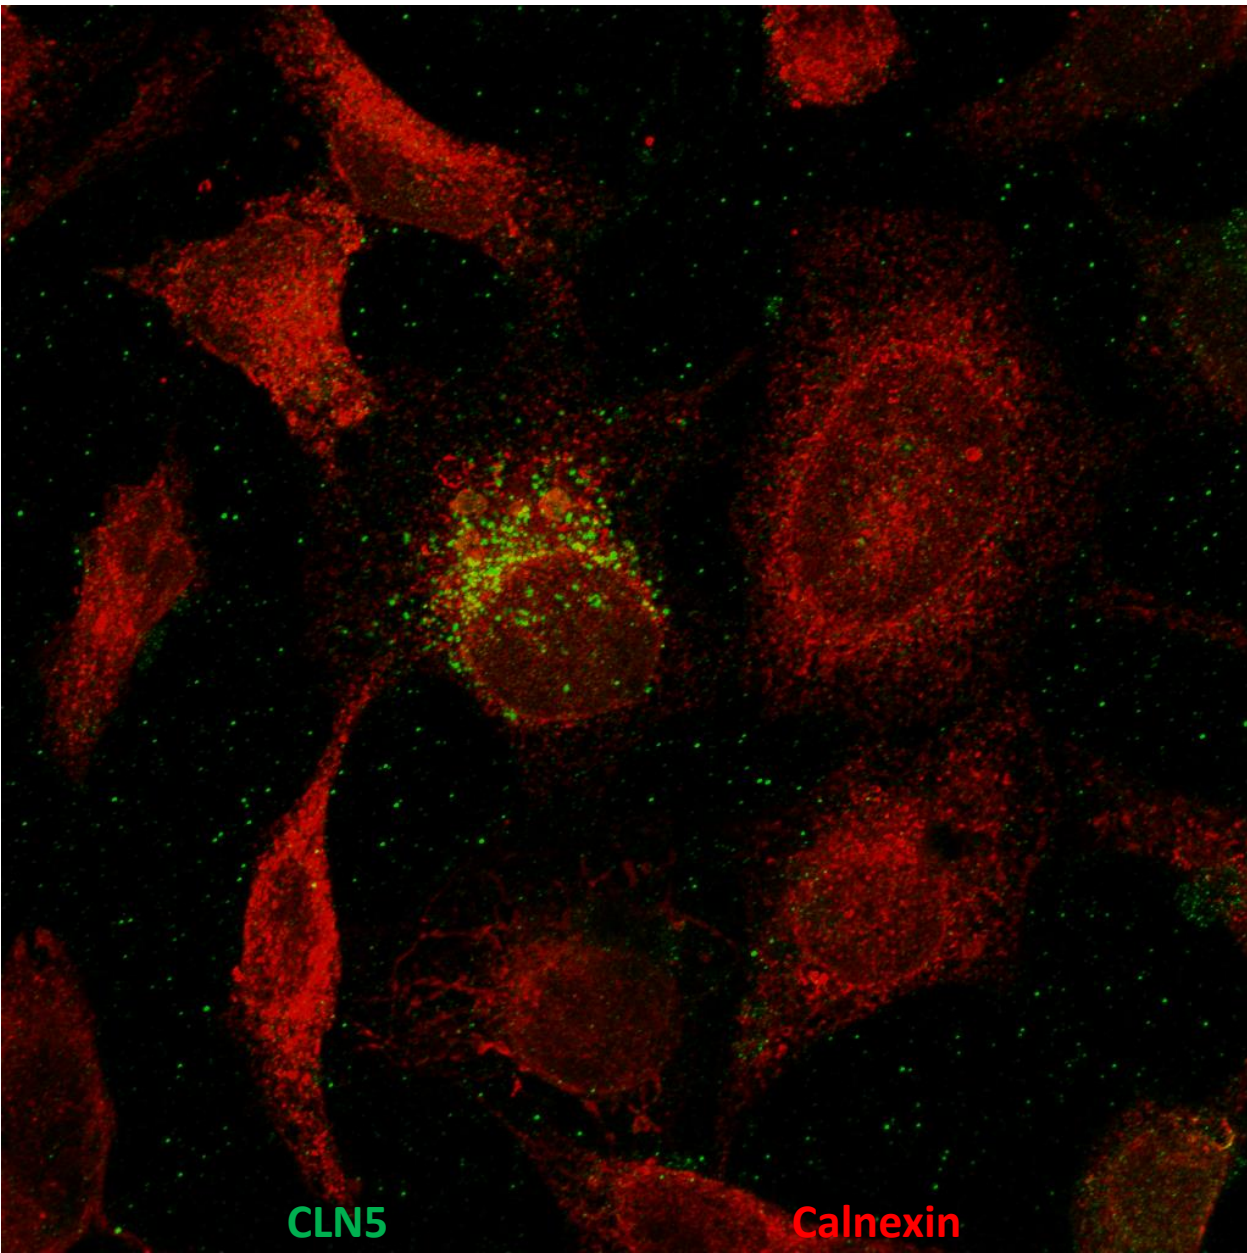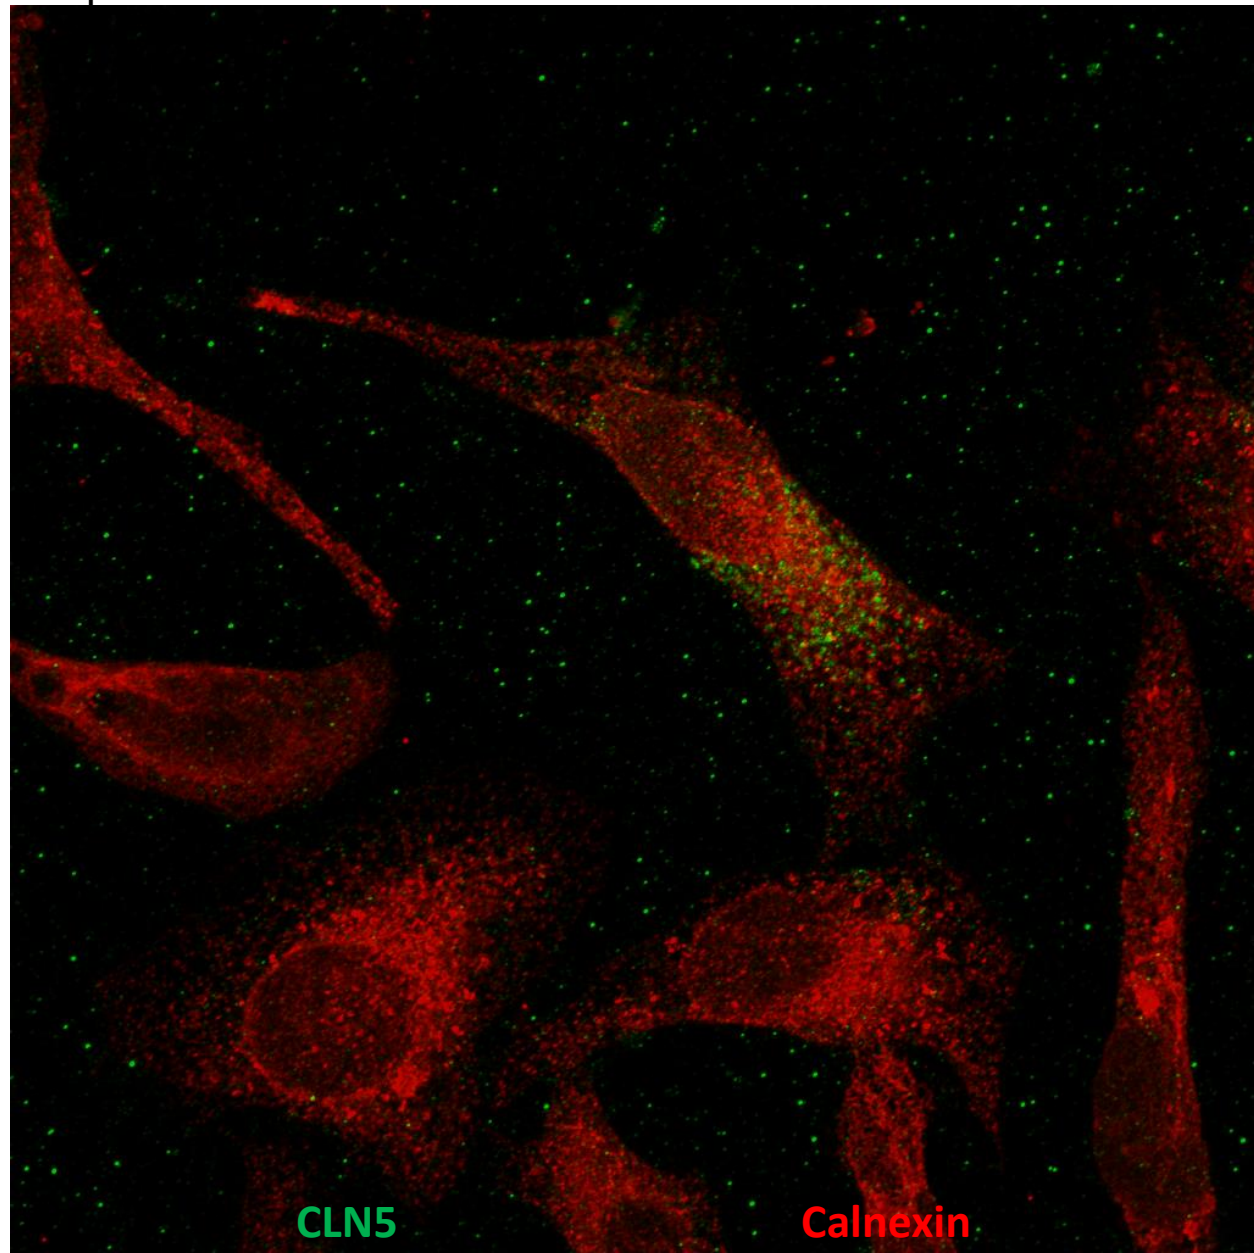

# N320S CLN5 expression

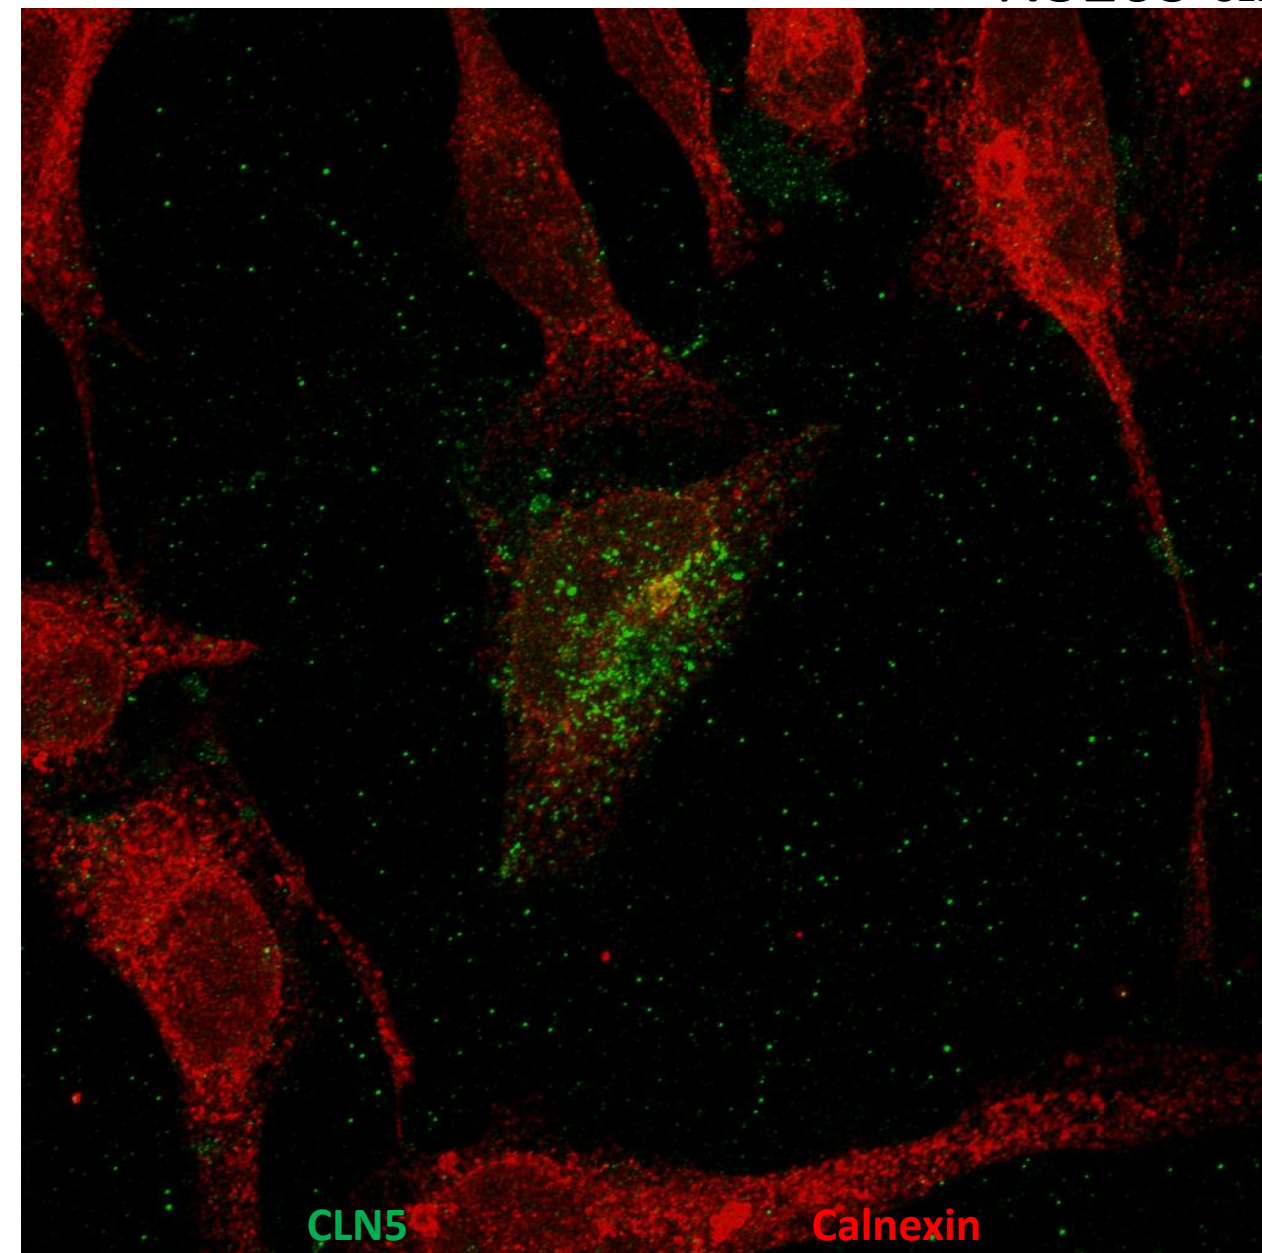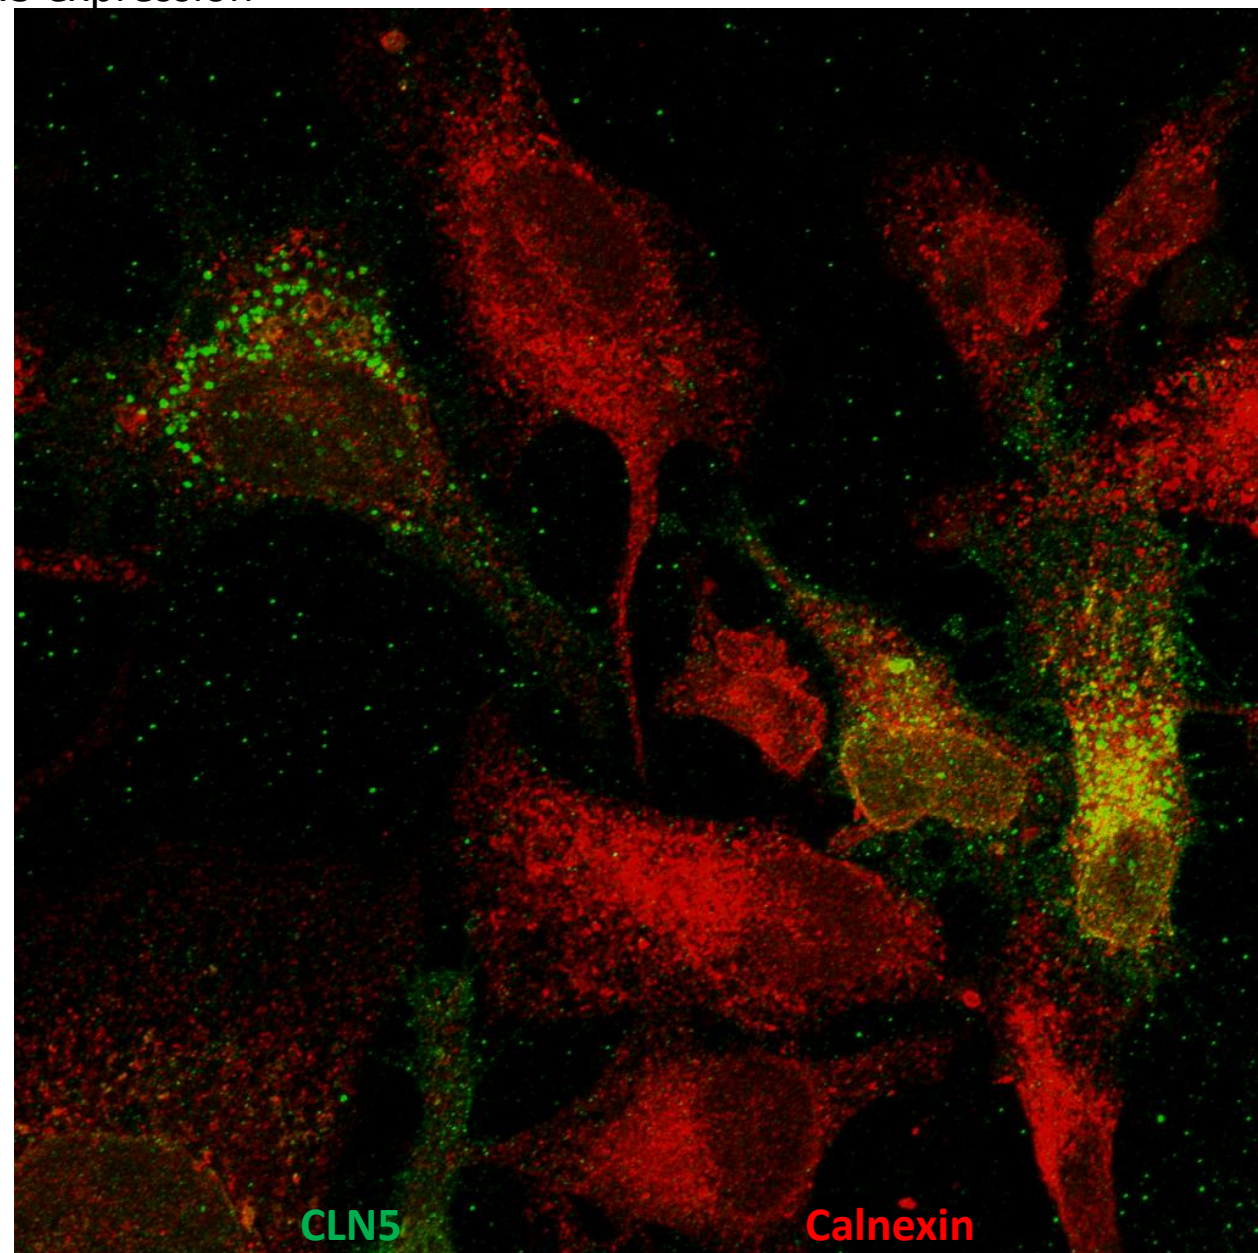

# N320S CLN5 expression

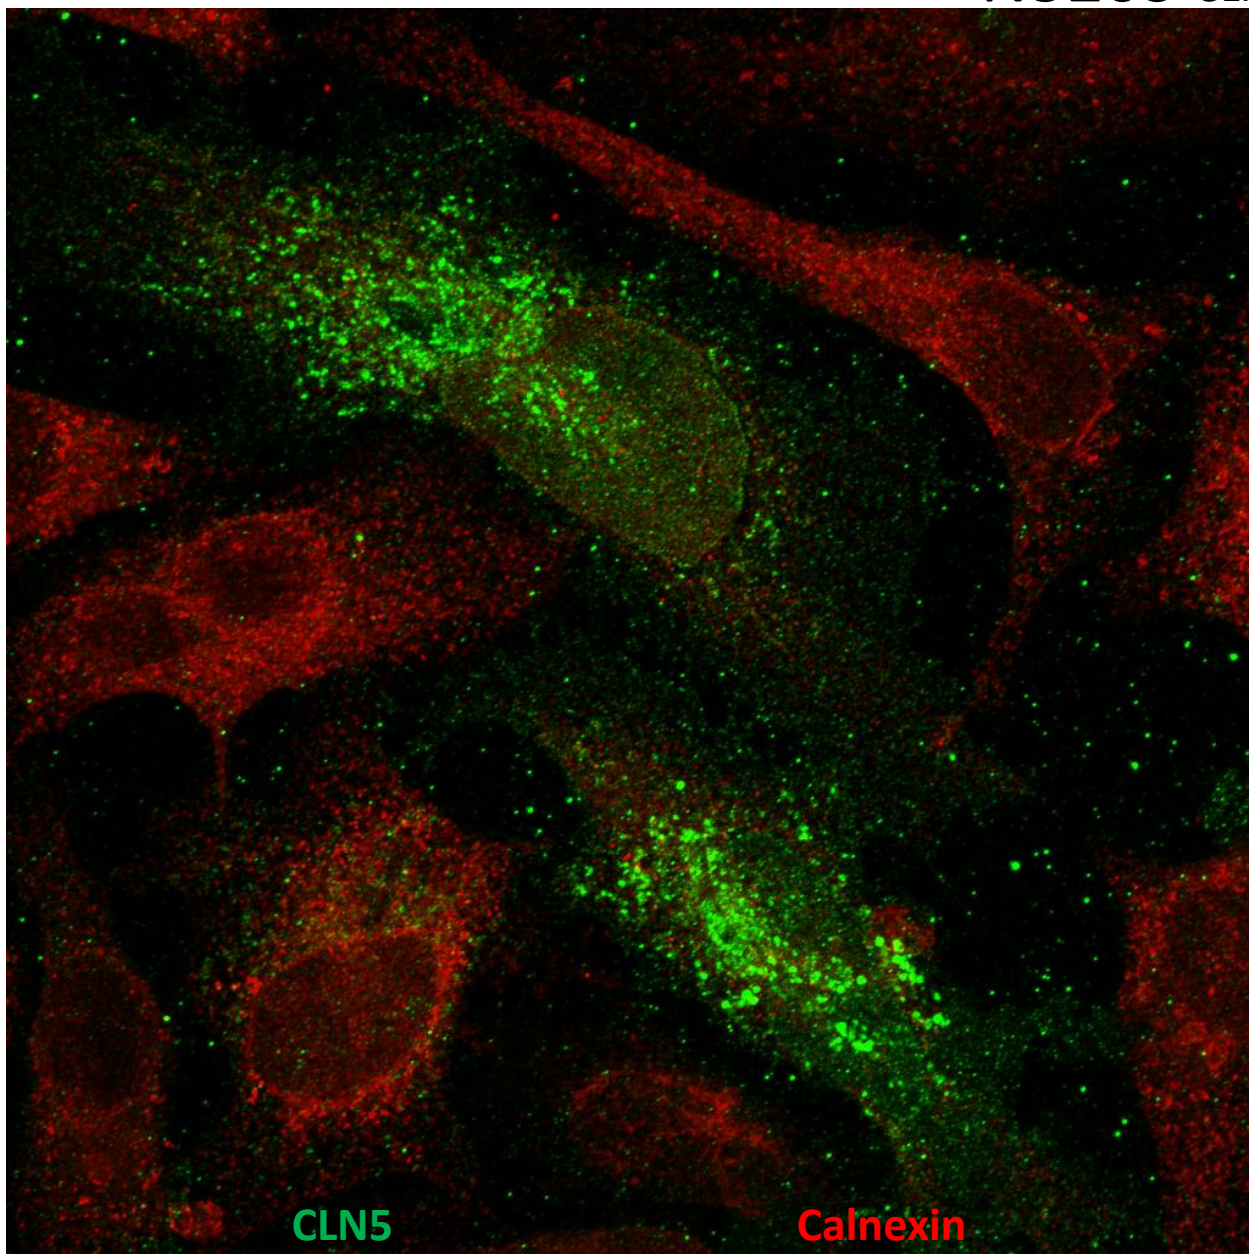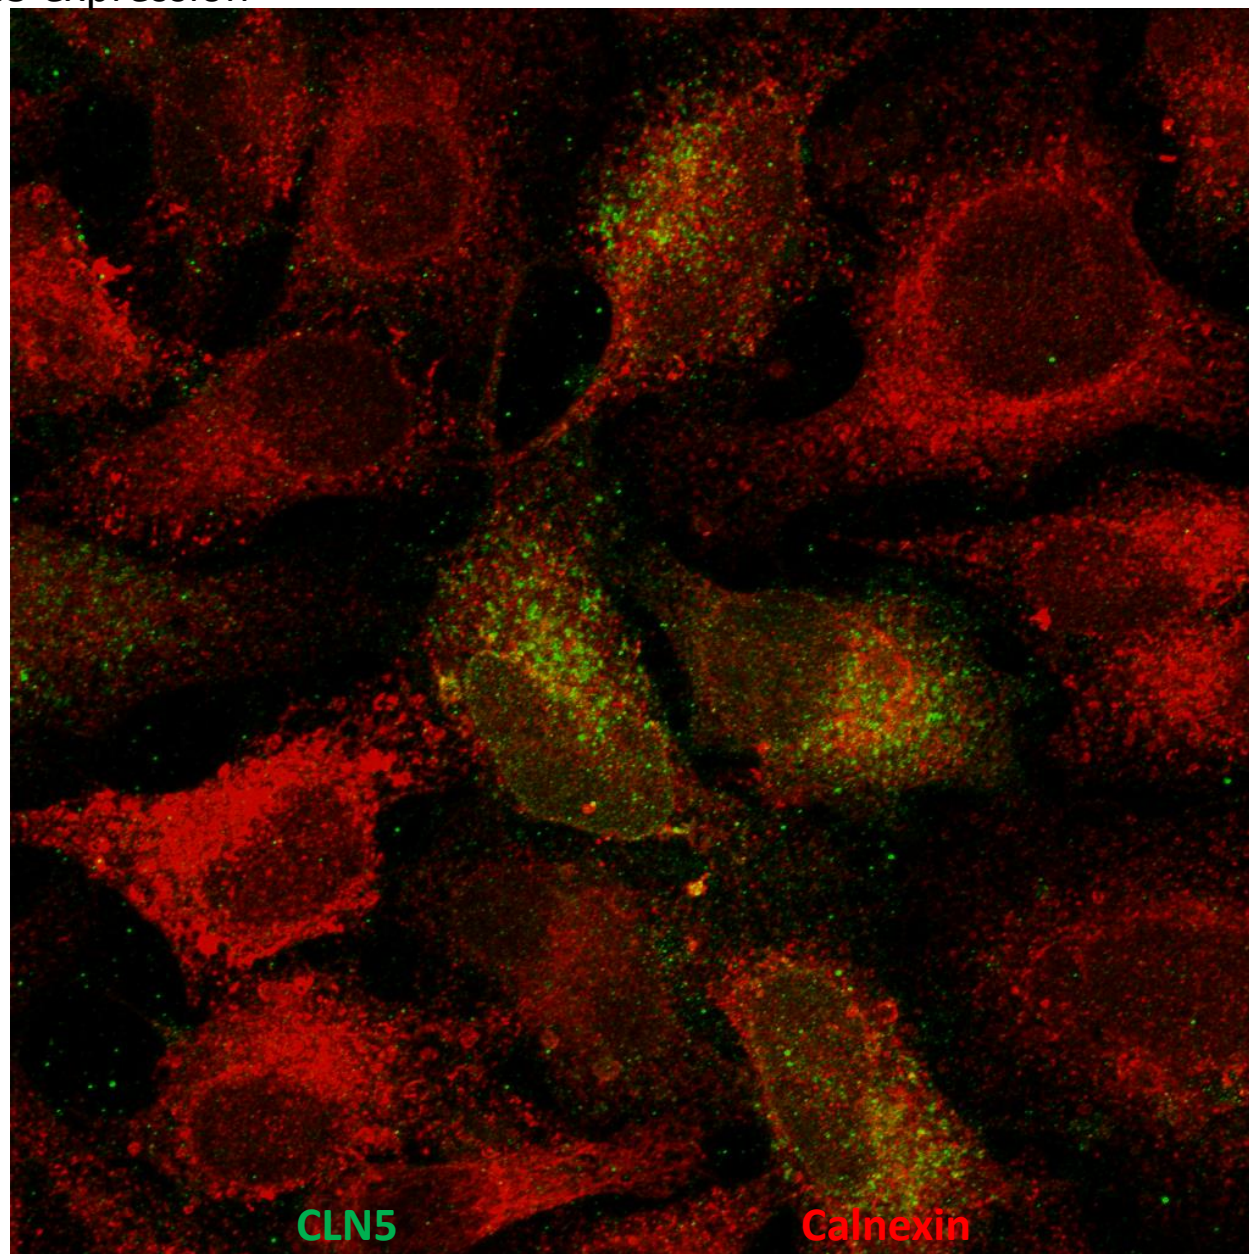



# N320S CLN5 expression

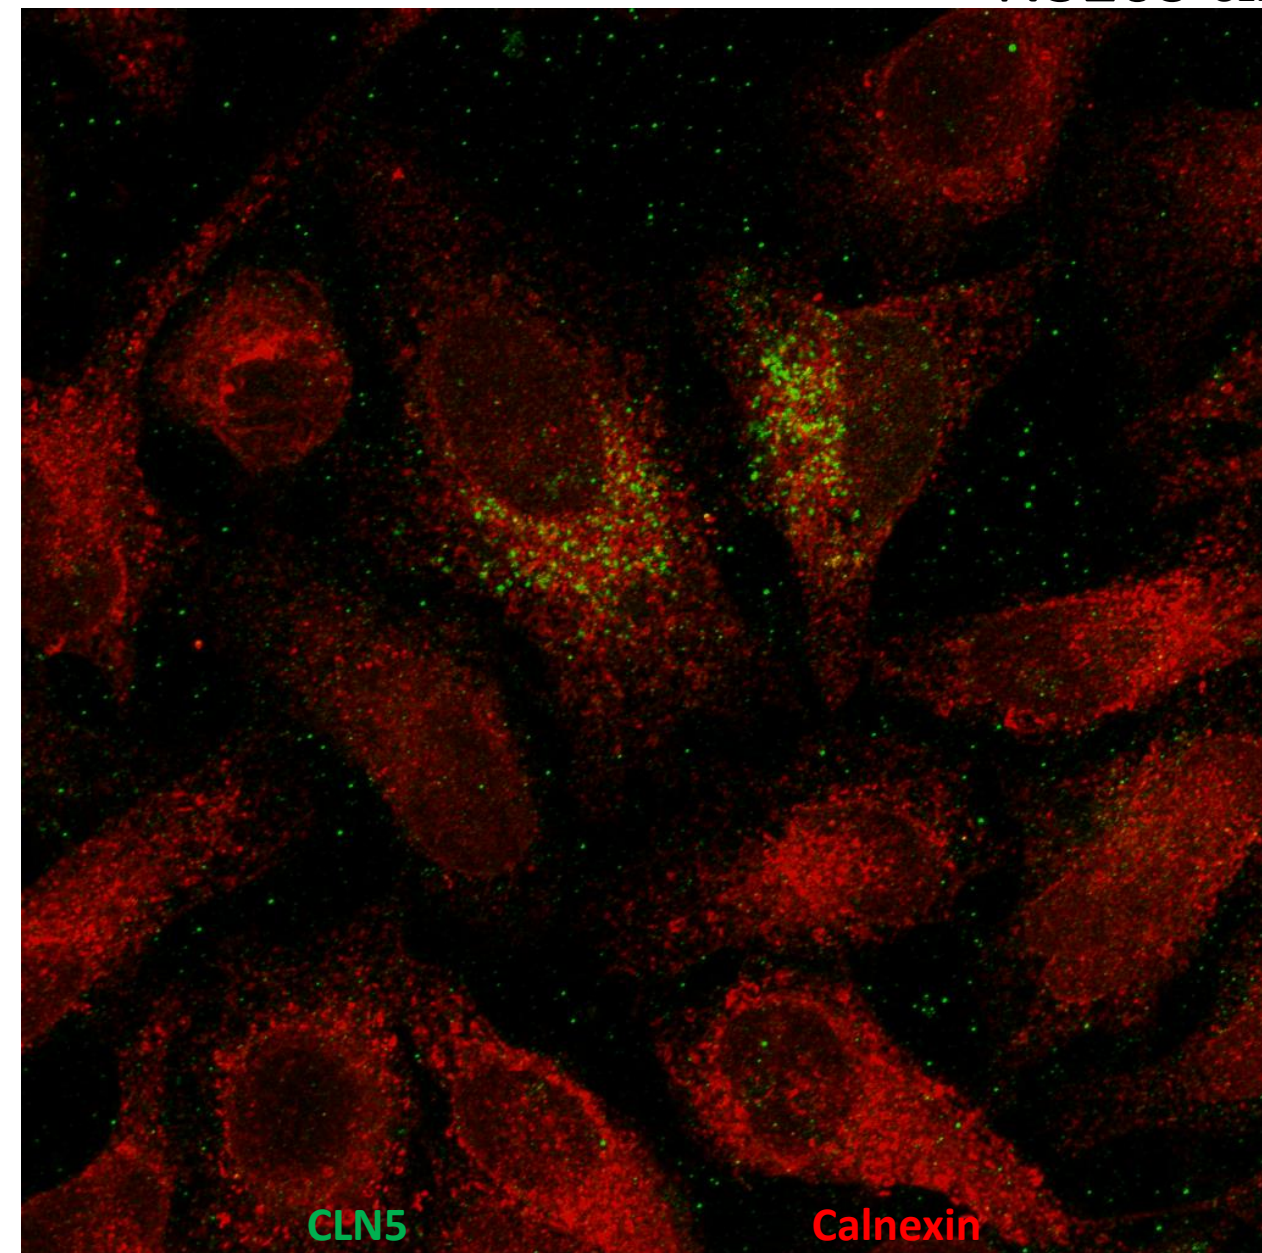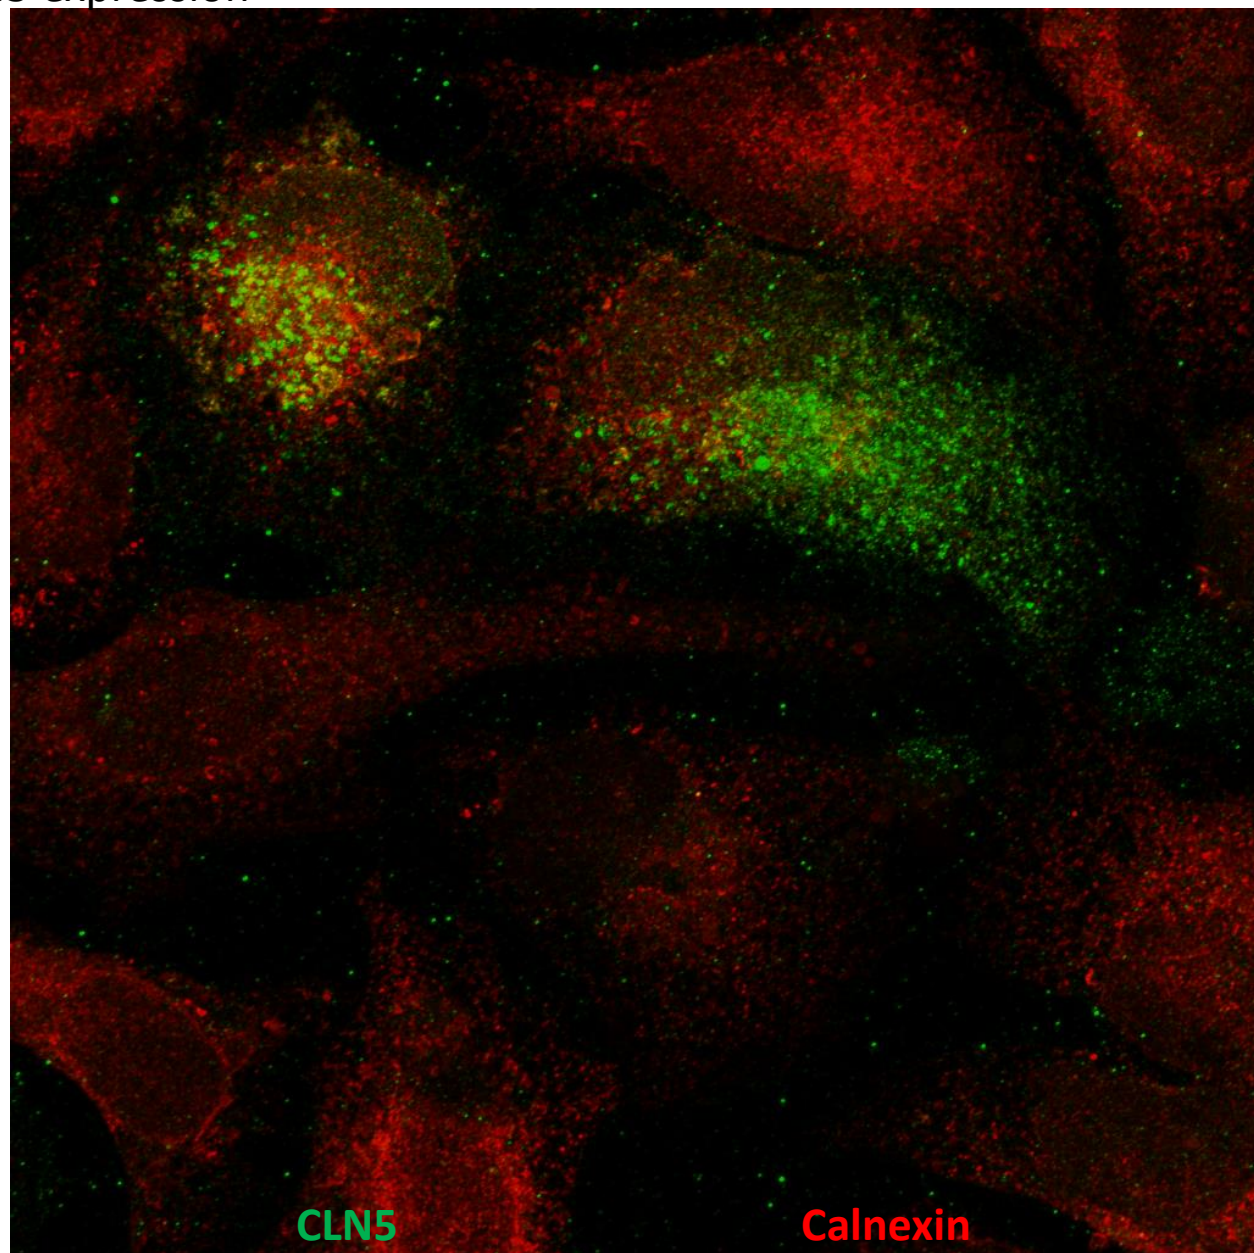

N320S CLN5 expression

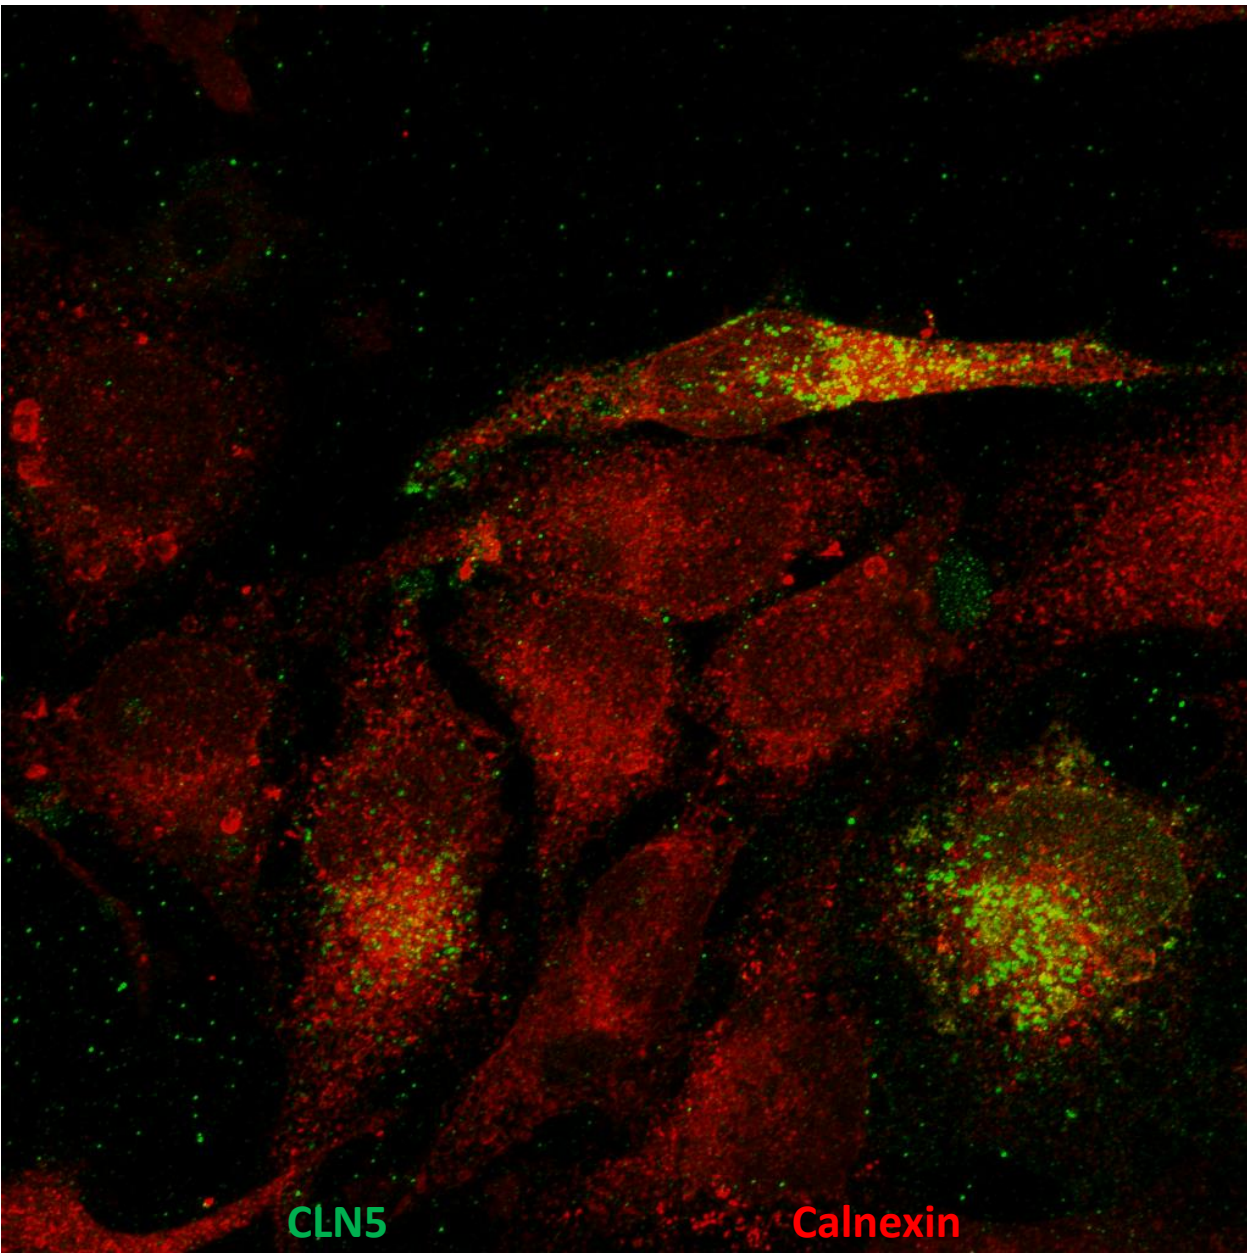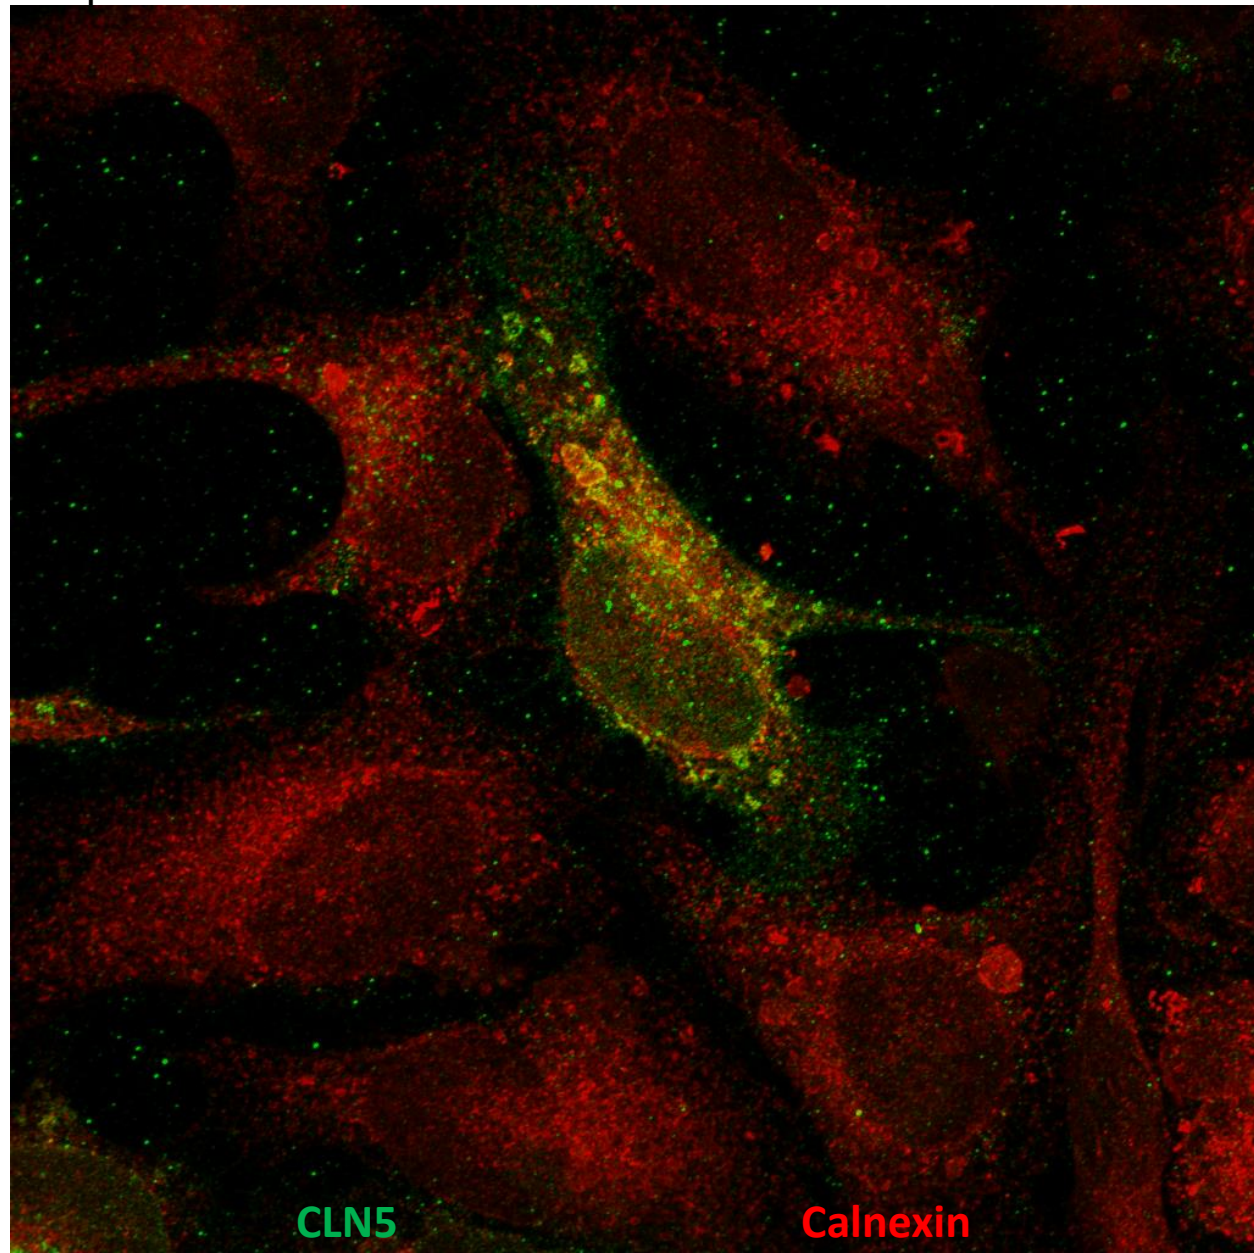

# N320S CLN5 expression

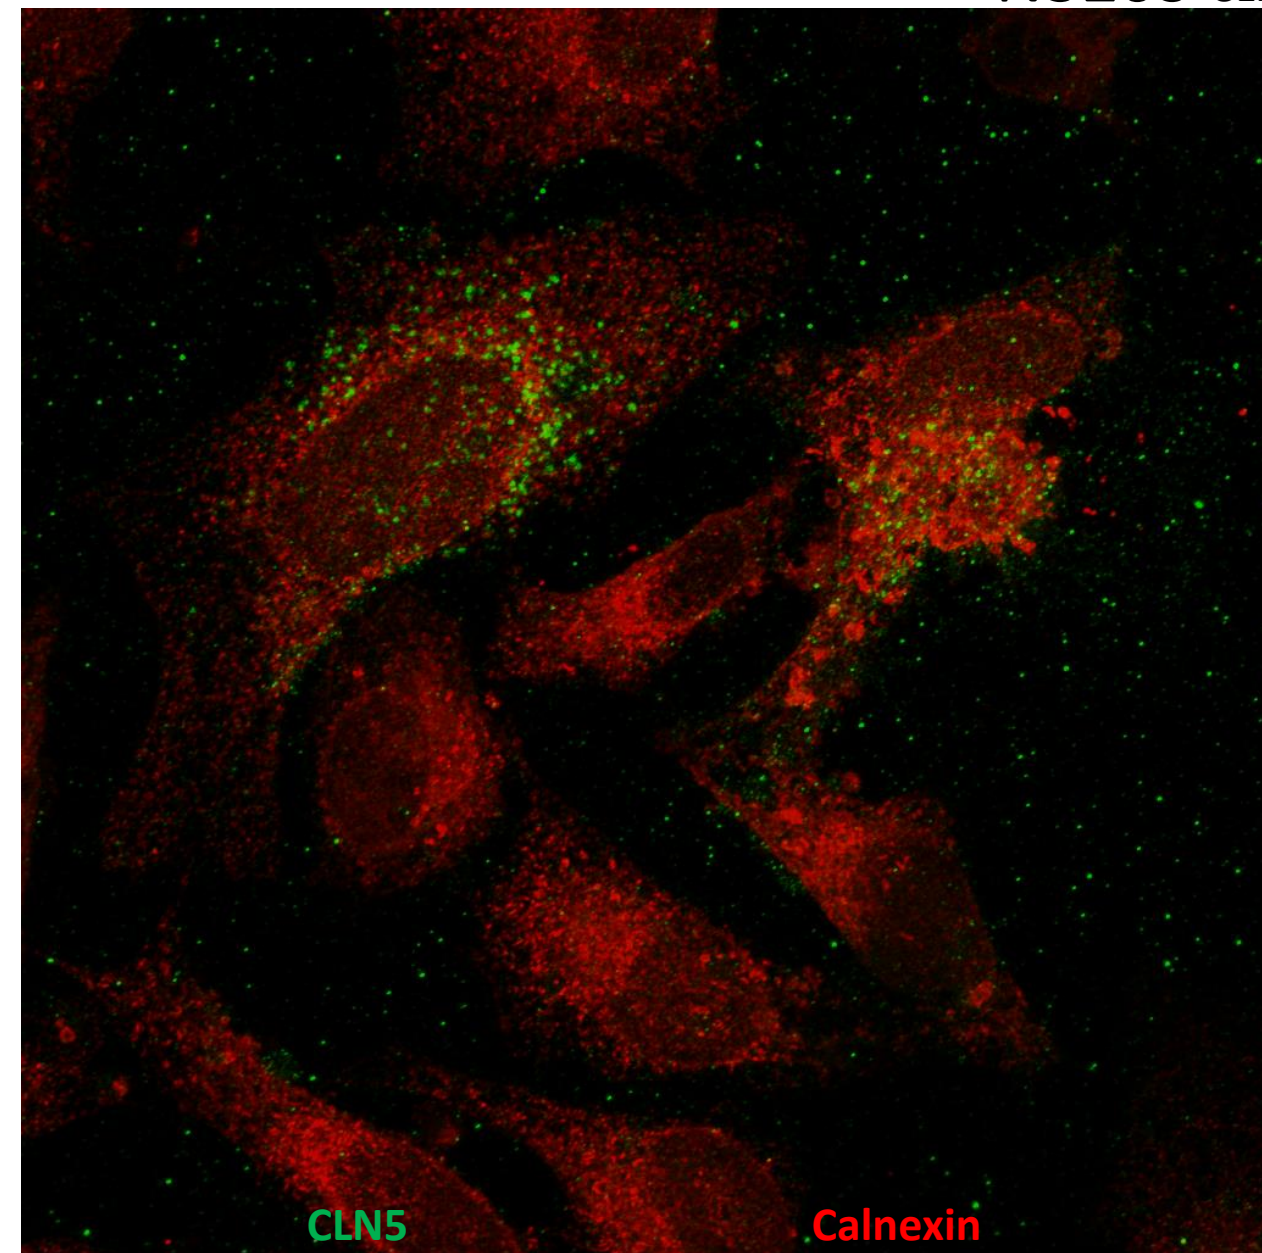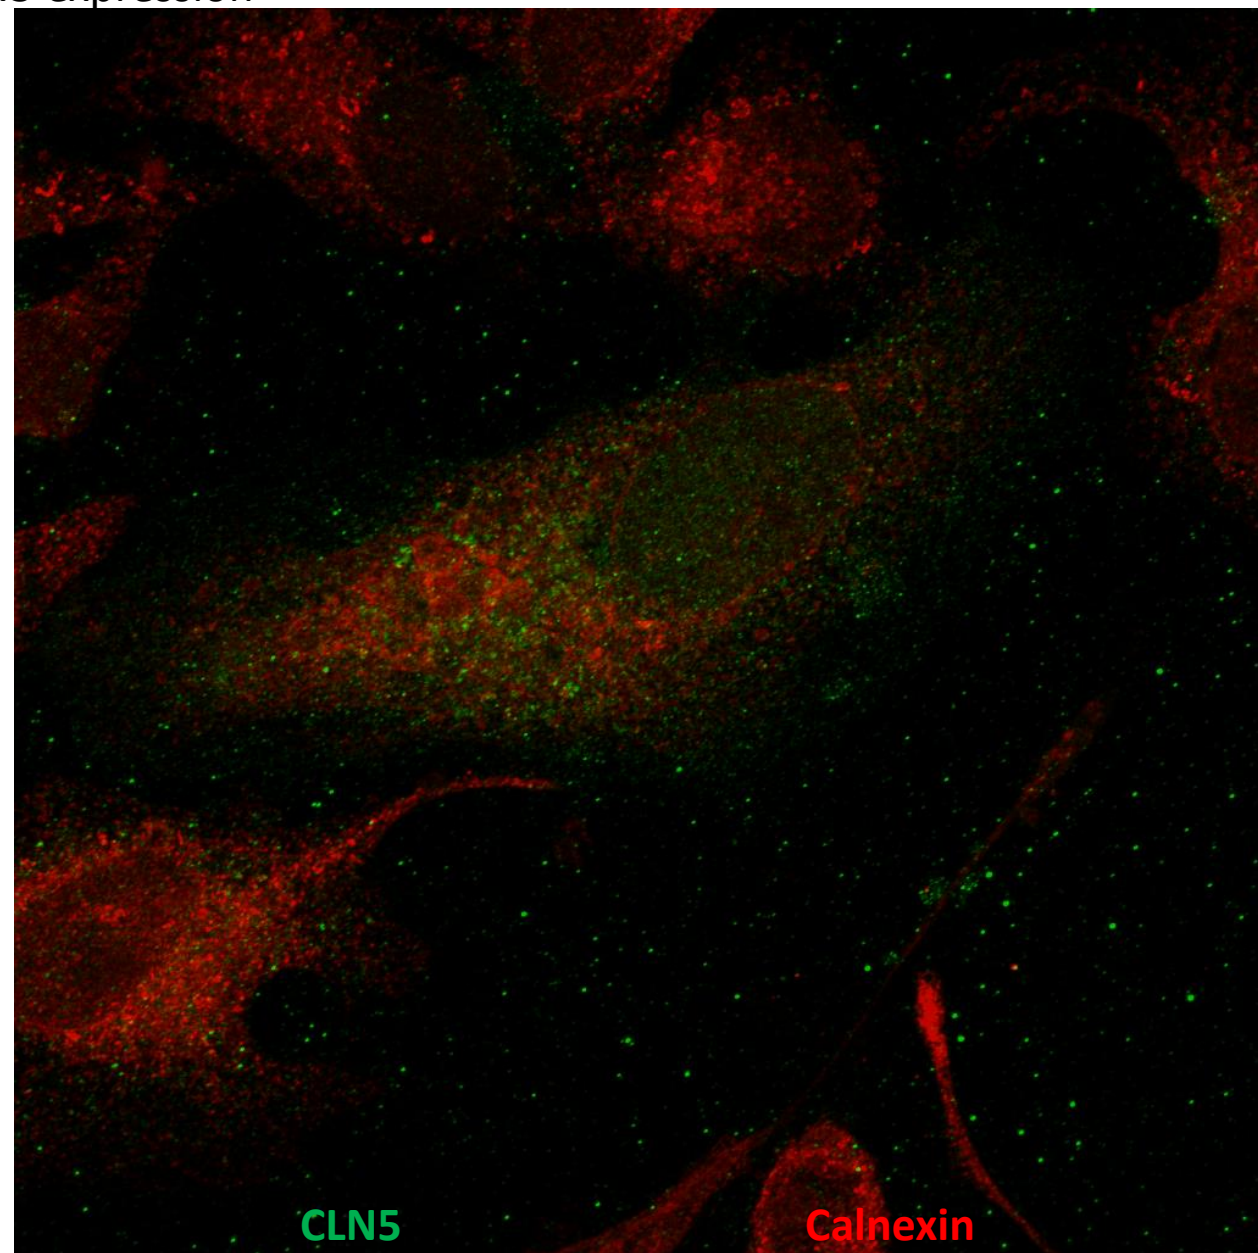

N320S CLN5 expression

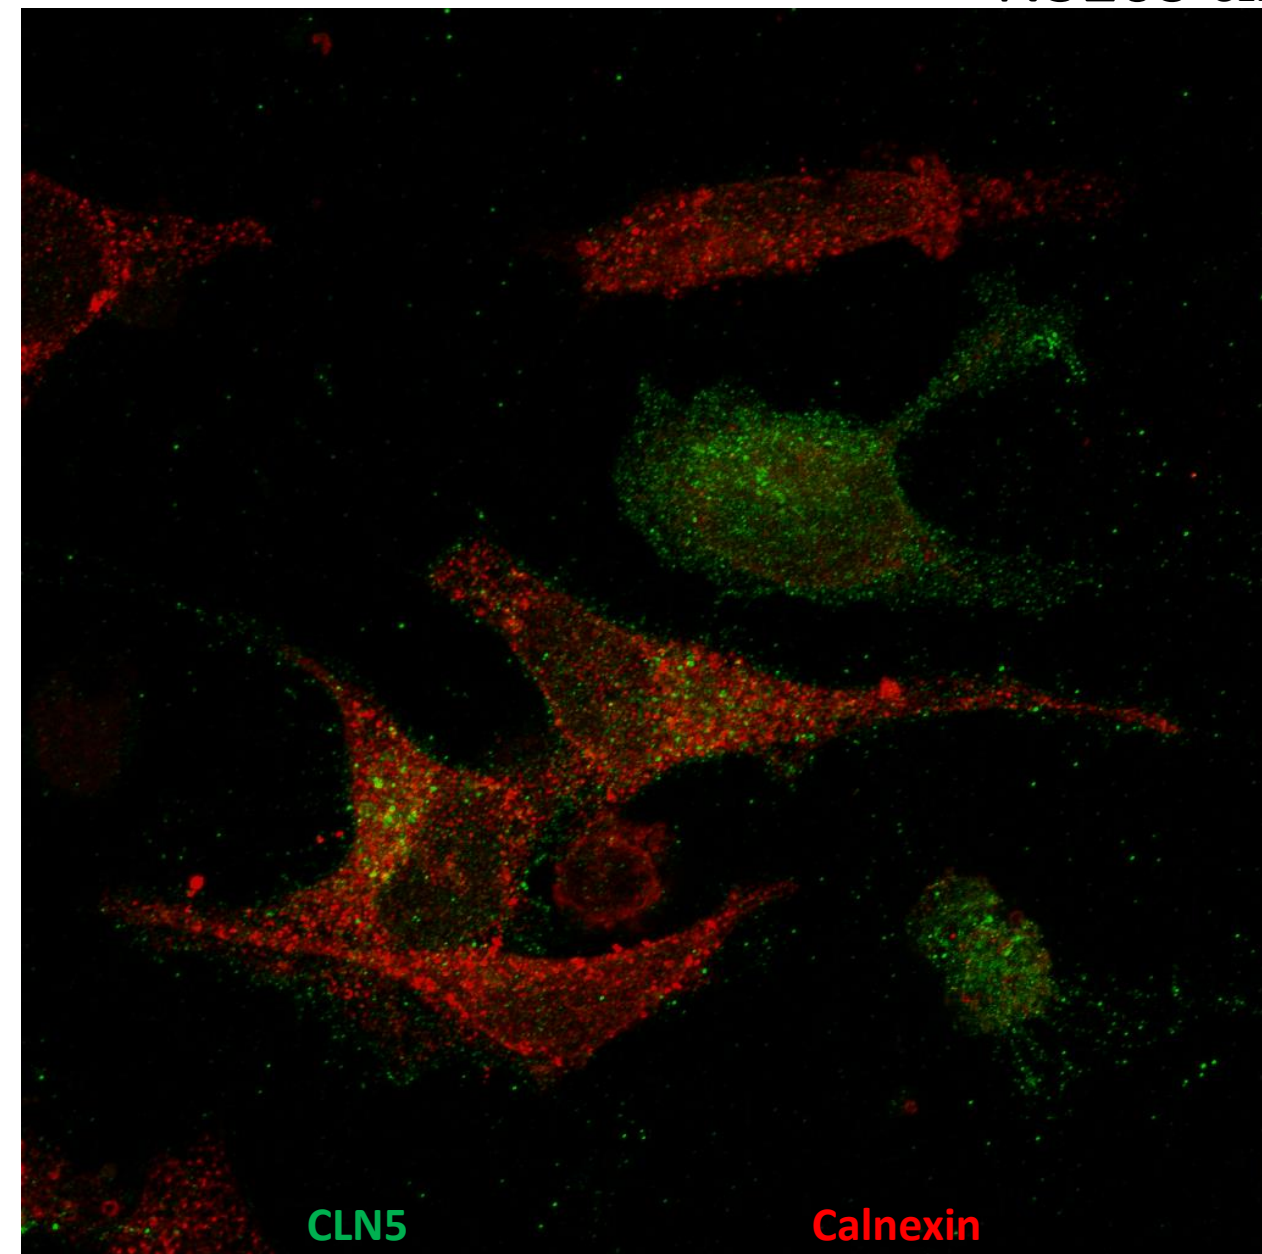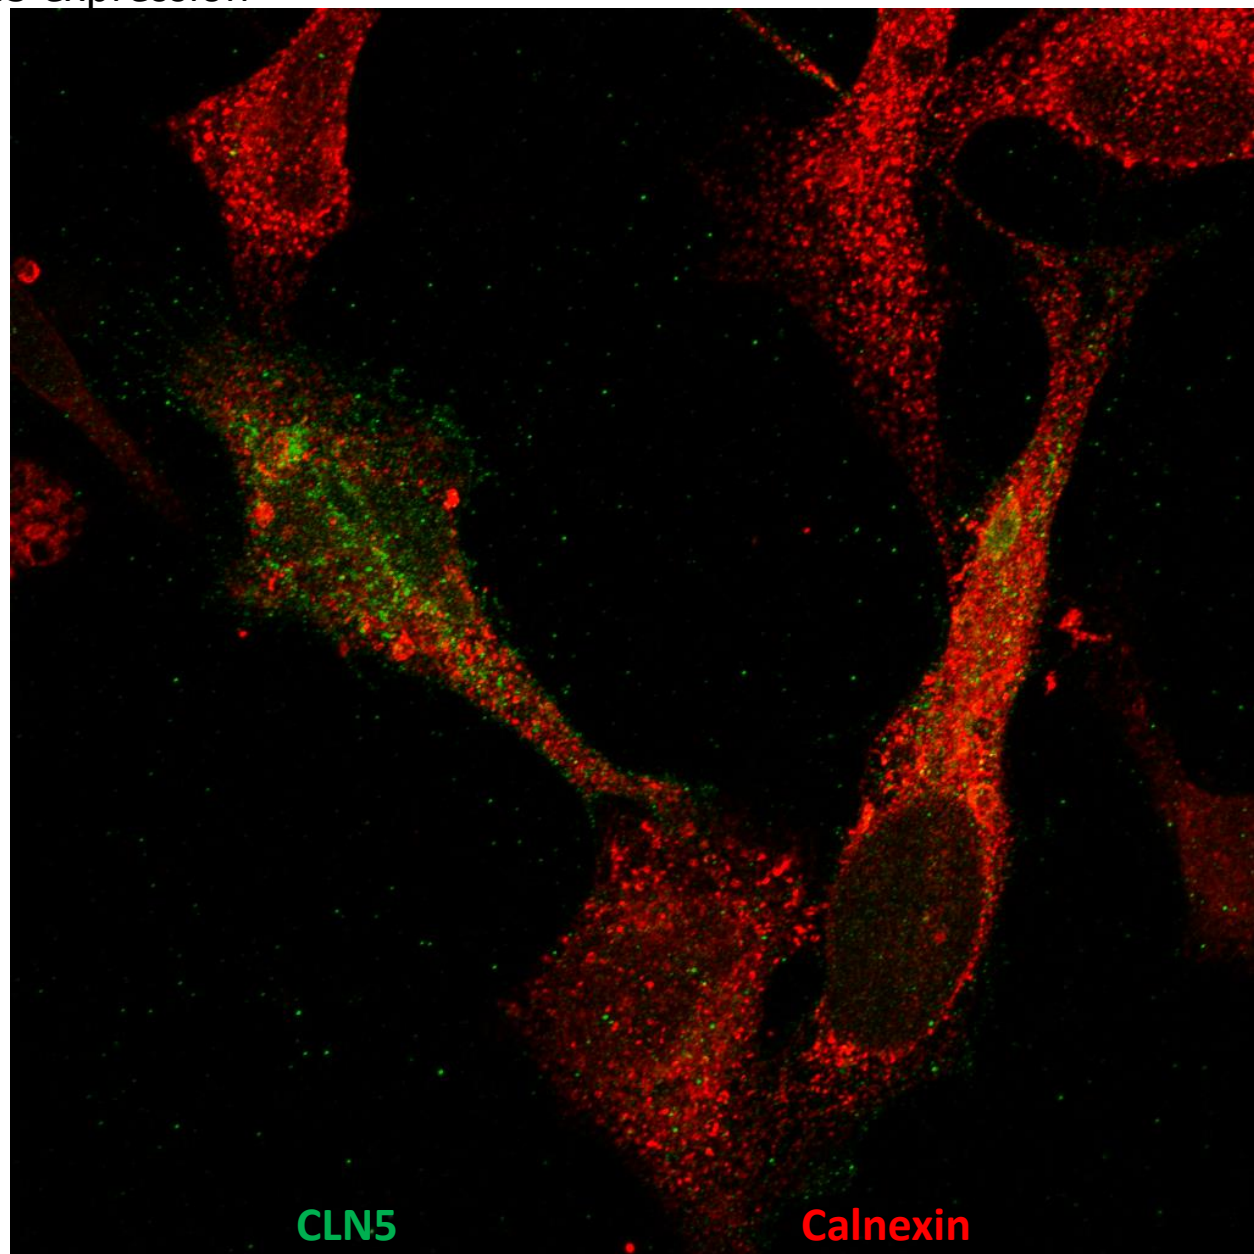

# N320S CLN5 expression

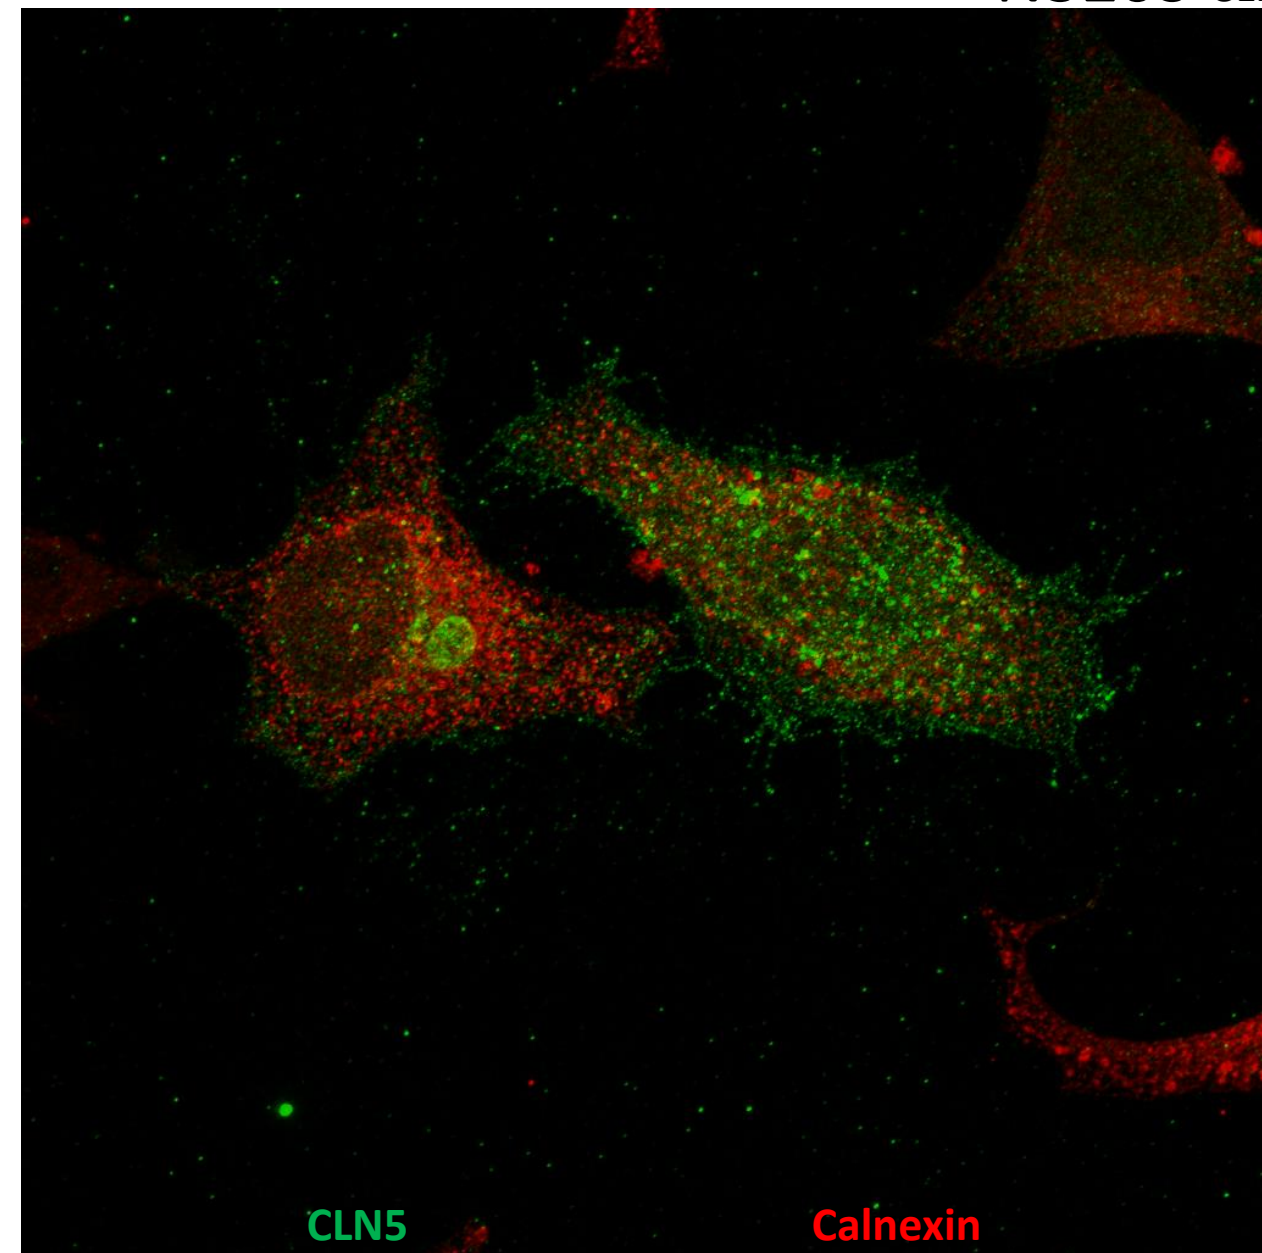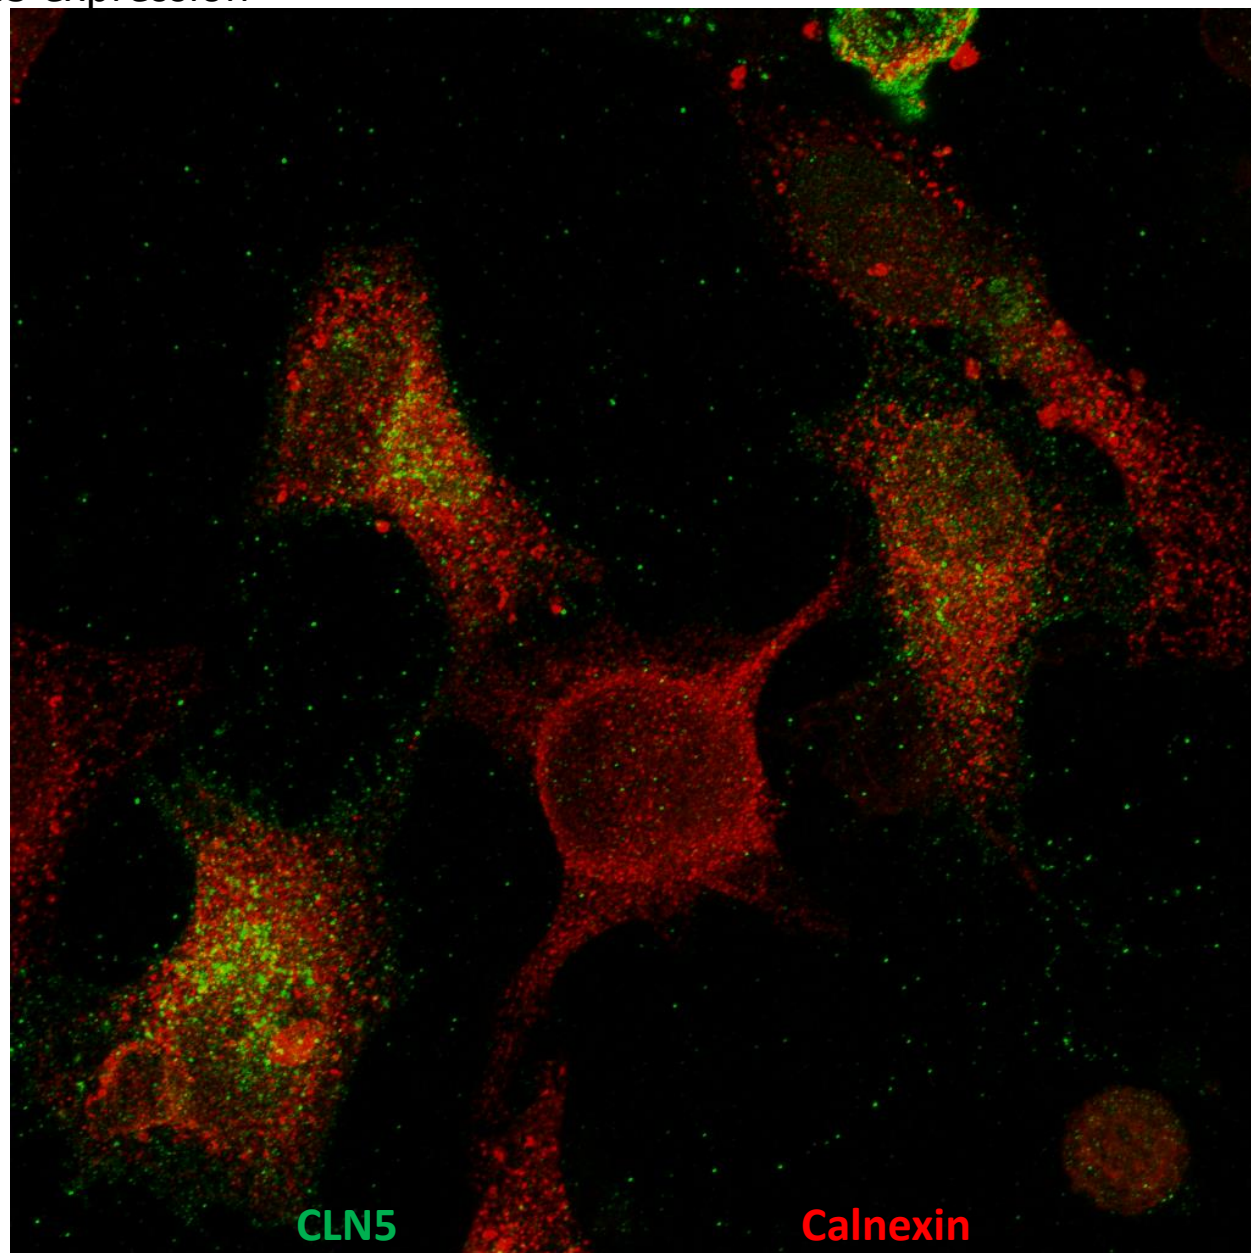

# N320S CLN5 expression

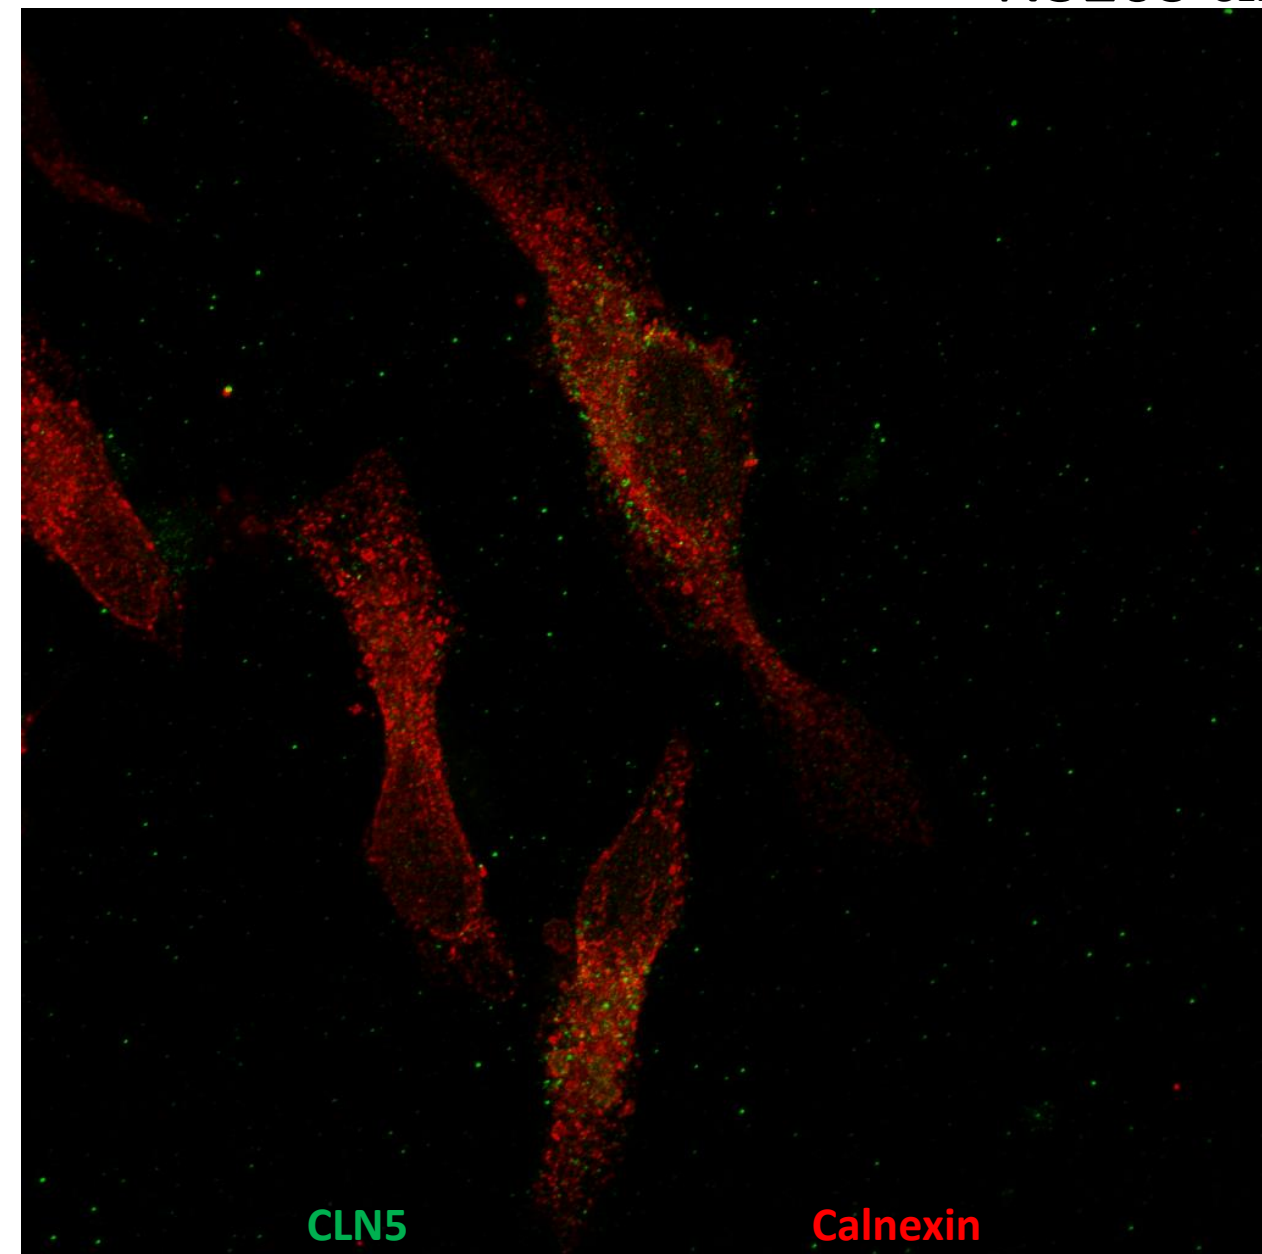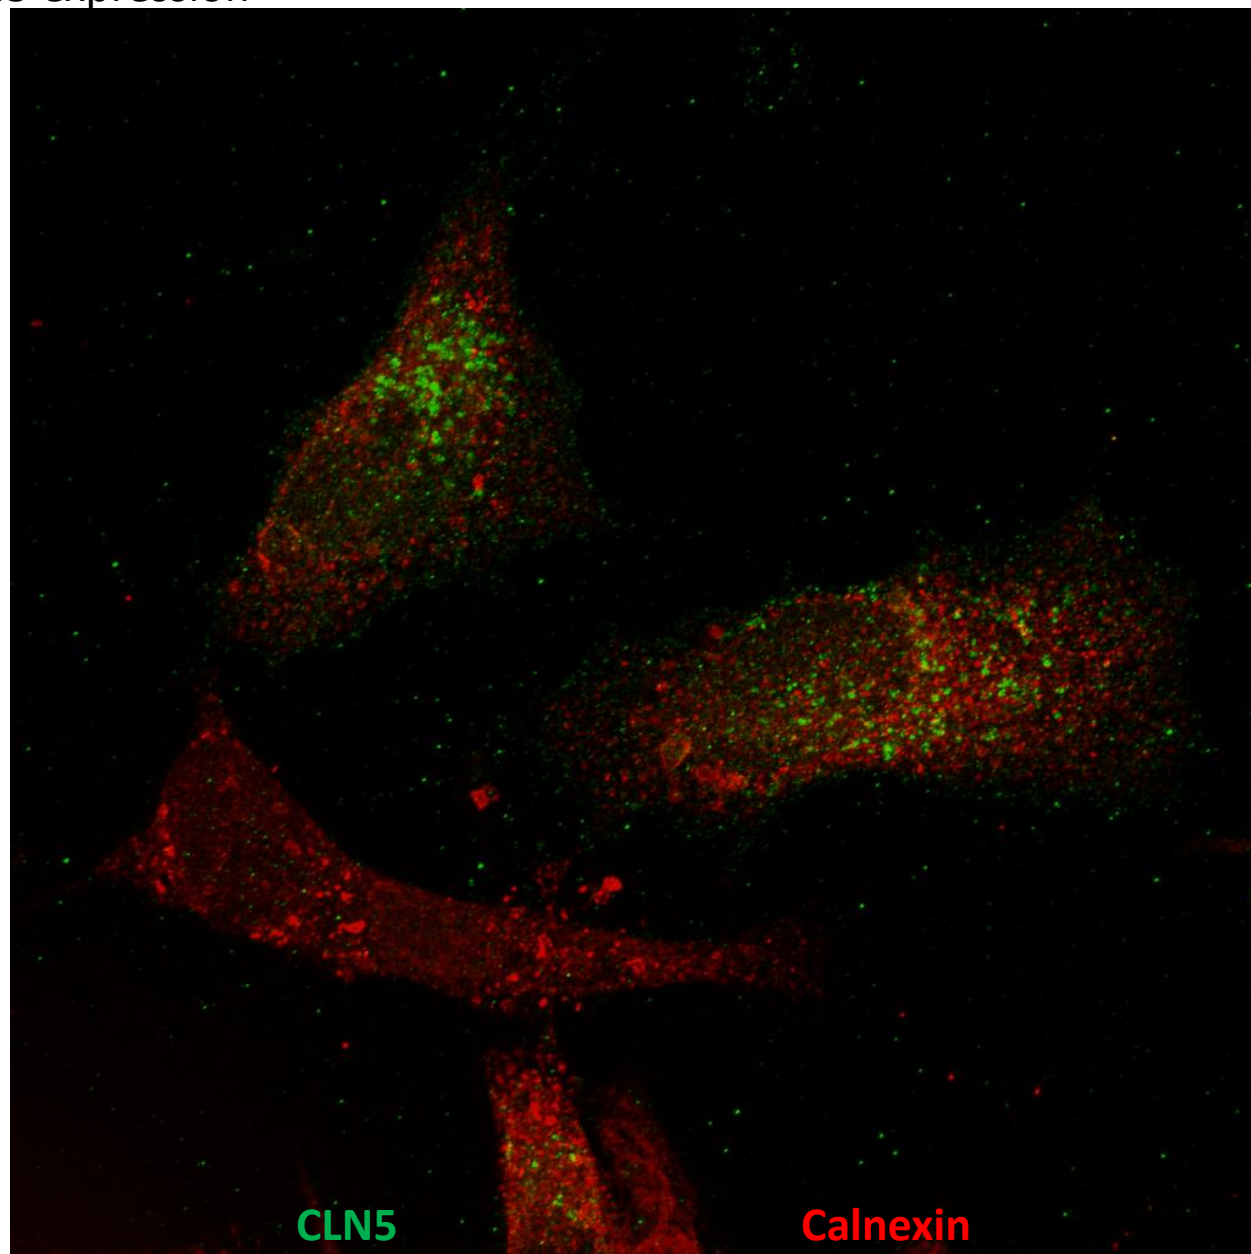

# N320S CLN5 expression

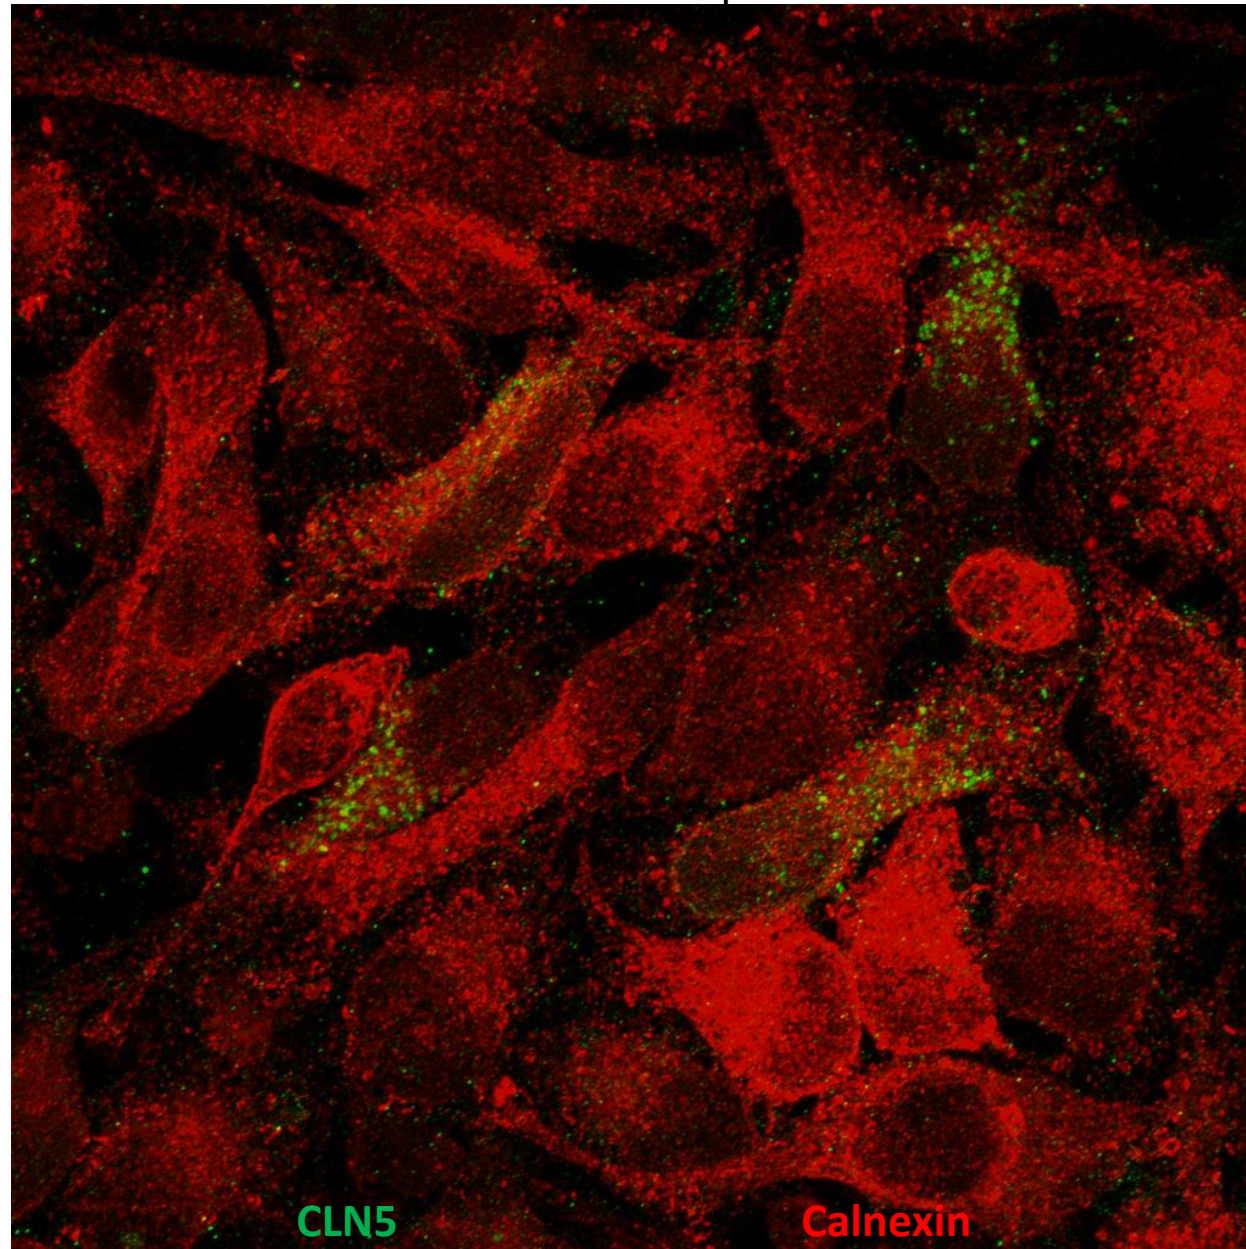

Supplement: zmb020181842s1.pdf [file zmb020181842s1.pdf]
